# Supplementary material
Source: PubMed Central journal article supplement (PMC3413329)

## General Procedures

All reactions were carried out under an argon atmosphere. Toluene was purchased from J.T. Baker in a CYCLE-TAINER solvent-deliver keg and vigorously purged with argon for 1 hour. The solvent was further purified by passing through successive alumina and Q5 reactant-packed columns on a solvent purification system. The anhydrous DMF was purchased from Aldrich Chemical Co. in Sure-Seal bottles and was used as received. Pd<sub>2</sub>(dba)<sub>3</sub> and **L2** were purchased from Strem Chemicals Inc. and TMSN<sub>3</sub>, CuI, alkynes, aryl halides, aryl triflates, benzotriazole and 1,2,3-triazole were purchased from Aldrich Chemical Co., Alfa Aesar, or TCI America and were used without further purification. Anhydrous tribasic potassium phosphate was purchased from Alfa Aesar, and stored in a glovebox. Small portions were removed and stored in a desiccator for up to 2 weeks (All reactions were set-up outside of the glovebox). **L1**, **L3** and **L4** were prepared by literature procedure.<sup>1,2</sup>

Reactions were monitored by GC and thin-layer chromatography (TLC) carried out on 0.25 mm E. Merck silica gel plates (60F-254) using UV light (*N*<sup>2</sup>-arylated 1,2,3-triazoles are more volatile and less polar than corresponding *N*<sup>1</sup>-arylated products). Flash silica gel chromatography was performed using Silicycle SiliaFlashP60 (230-400 mesh) silica gel. All compounds were characterized by <sup>1</sup>H NMR, <sup>13</sup>C NMR, IR spectroscopy. Copies of the <sup>1</sup>H and <sup>13</sup>C NMR spectra can be found at the end of the Supporting Information. Nuclear Magnetic Resonance spectra were recorded on a Bruker 400 MHz instrument. All <sup>1</sup>H NMR experiments are reported in δ units, parts per million (ppm), and were measured relative to the signals for residual chloroform (7.26 ppm) or dimethylsulfoxide (2.50 ppm) in the deuterated solvent. All <sup>13</sup>C NMR spectra are reported in ppm relative to deuteriochloroform (77.23 ppm) or dimethylsulfoxide-*d*<sub>6</sub> (39.52 ppm), and all were obtained with 1H decoupling. All IR spectra were taken on a Perkin – Elmer 2000 FTIR. All GC analyses were performed on a Agilent 6890 gas chromatograph with an FID detector using a J & W DB-1 column (10 m, 0.1 mm I.D.). Elemental analyses were performed by Atlantic Microlabs Inc., Norcross, GA. The pure compounds are estimated to be ≥ 95% pure as determined by <sup>1</sup>H NMR and GC analysis

## Computational Methods

All calculations were carried out with Gaussian03 suite of computational programs.<sup>3</sup> Ground state geometry optimizations were evaluated using B3LYP<sup>4</sup> density functional method. For C, H, and N atoms, the 6-31G(d) basis set was used; while LANL2DZ effective core potentials of Hay and Wadt<sup>5</sup> with double-ζ basis sets were used for Pd and P atoms. Frequency calculations were performed on all optimized structures to verify that they have no negative frequencies. The Gibbs free energies were calculated at 298.15 K and 1 atm. Single point energy calculations were done with the 6-311+G(2d,p) basis set to obtain higher accuracy electronic energies.

## General Procedure for the synthesis of 4-substituted 1,2,3-triazoles<sup>6</sup>

*Caution:* This reaction produces explosive and toxic hydrogen azide (HN<sub>3</sub>) in situ. The reaction should be conducted behind a safety shield in a hood.

An oven-dried vial was equipped with a magnetic stir bar and charged with CuI (95 mg, 0.5 mmol) (alkynes that were solid at room temperature were added at this point). The vial was sealed with a screw-cap septum, and then evacuated and backfilled with argon (this process was repeated a total of 3 times). TMSN<sub>3</sub> (2.0 mL, 15 mmol) and alkyne (10 mmol) were added via syringe, followed by addition of DMF/MeOH (4:1, 10 mL). The reaction mixture was stirred at 100 °C for 6-24 h. The reaction mixture was cooled to room temperature, diluted with EtOAc, washed with 30% aqueous NH<sub>4</sub>OH, dried over MgSO<sub>4</sub>, concentrated in vacuo and purified via flash chromatography.

*Note:* A safer two-step preparation of 4-substituted 1,2,3-triazoles is also available.<sup>7</sup>

## 4-Phenyl-1,2,3-triazole (CAS:1680-44-0)

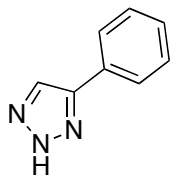

Following general procedure for the synthesis of 4-substituted-1,2,3-triazoles, a mixture of phenylacetylene (1.1 mL, 10 mmol),  $\text{TMSN}_3$  (2.0 mL, 1.2 mmol), CuI (95 mg, 0.5 mmol), in DMF/MeOH (4:1, 10 mL) was heated to 100 °C for 6 h. The crude product was purified via flash chromatography (Hexanes/EtOAc, 1:1) to provide the title compound as a white solid (1.26 g, 86%), mp 144-145 °C.  $^1\text{H}$  NMR (400 MHz, DMSO-*d*<sub>6</sub>)  $\delta$  15.20 (s, 1H), 8.34 (s, 1H), 7.88 (d,  $J$  = 7.6 Hz, 2H), 7.48-7.38 (m, 2H), 7.37-7.27 (m, 1H);  $^{13}\text{C}$  NMR (100 MHz,  $\text{CDCl}_3$ )  $\delta$  145.3, 130.4, 129.0, 128.4, 128.2, 125.6; IR (film)  $\nu_{\text{max}}$  3854, 3746, 3115, 2852, 2335, 1699, 1652, 1558, 1456, 1385, 1081, 976, 874, 765, 692, 514  $\text{cm}^{-1}$ ; Anal. Calcd. For  $\text{C}_8\text{H}_7\text{N}_3$ : C, 66.19; H, 4.86. Found: C, 66.31; H, 4.81.

#### 4-(2,4-Difluorophenyl)-1,2,3-triazole (CAS:1043553-13-4)

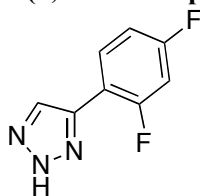

Following general procedure for the synthesis of 4-substituted-1,2,3-triazoles, a mixture of 2,4-difluorophenylacetylene (1.38 g, 10 mmol),  $\text{TMSN}_3$  (2.0 mL, 1.2 mmol), CuI (95 mg, 0.5 mmol), in DMF/MeOH (4:1, 10 mL) was heated to 100 °C for 6 h. The crude product was purified via flash chromatography (Hexanes/EtOAc, 3:2) to provide the title compound as a white solid (1.47 g, 81%). mp 110-112 °C  $^1\text{H}$  NMR (400 MHz, DMSO-*d*<sub>6</sub>)  $\delta$  15.34 (s, 1H), 8.13 (s, 1H), 8.01 (dd,  $J$  = 8.4, 15.6 Hz, 1H), 7.33-7.24 (m, 1H), 7.17-7.08 (m, 1H);  $^{13}\text{C}$  NMR (100 MHz,  $\text{CDCl}_3$ )  $\delta$  161.9 (dd,  $J$  = 13, 247 Hz), 159.1 (dd,  $J$  = 12, 250 Hz), 139.0, 129.2 (dd,  $J$  = 5, 10 Hz), 128.0, 115.1 (dd,  $J$  = 5, 14 Hz), 112.2 (dd,  $J$  = 4, 21 Hz), 104.6 (t,  $J$  = 26 Hz); IR (film)  $\nu_{\text{max}}$  3853, 3745, 3127, 2858, 2335, 1697, 1652, 1538, 1471, 1385, 1270, 1137, 1072, 982, 844, 772, 668, 612  $\text{cm}^{-1}$ ; Anal. Calcd. For  $\text{C}_8\text{H}_5\text{N}_3\text{F}_2$ : C, 53.04; H, 2.78. Found: C, 53.49; H, 2.78.

#### 3-(1,2,3-Triazol-4-yl)pyridine (CAS:120241-79-4)

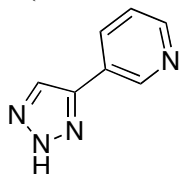

Following general procedure for the synthesis of 4-substituted-1,2,3-triazoles, a mixture of 3-ethynylpyridine (1.03 g, 10 mmol),  $\text{TMSN}_3$  (2.0 mL, 1.2 mmol), CuI (95 mg, 0.5 mmol), in DMF/MeOH (4:1, 10 mL) was heated to 100 °C for 18 h. The crude product was recrystallized from EtOAc/Et<sub>2</sub>O to give the title compound as a off-white solid (1.19 g, 83%) mp 180-182 °C.  $^1\text{H}$  NMR (400 MHz, DMSO-*d*<sub>6</sub>)  $\delta$  15.36 (s, 1H), 9.10 (s, 1H), 8.54 (d,  $J$  = 3.6 Hz, 1H), 8.47 (s, 1H), 8.21 (d,  $J$  = 8.0 Hz, 1H), 7.45 (dd,  $J$  = 3.6, 7.6 Hz, 1H);  $^{13}\text{C}$  NMR (100 MHz,  $\text{CDCl}_3$ )  $\delta$  148.7, 146.4, 142.6, 132.5, 126.9, 126.1, 123.6; IR (film)  $\nu_{\text{max}}$  3854, 3746, 2362, 1652, 1507, 1457, 1358, 1124, 953, 895, 806, 694  $\text{cm}^{-1}$ ; Anal. Calcd. For  $\text{C}_7\text{H}_6\text{N}_4$ : C, 57.53; H, 4.14. Found: C, 57.55; H, 4.09.

#### 4-Butyl-1,2,3-triazole (CAS: 152066-45-0)

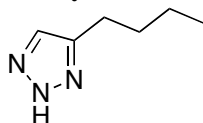

Following general procedure for the synthesis of 4-substituted-1,2,3-triazoles, a mixture of 1-hexyne (1.5 mL, 10 mmol), TMSN<sub>3</sub> (2.0 mL, 1.2 mmol), CuI (95 mg, 0.5 mmol), in DMF/MeOH (4:1, 10 mL) was heated to 100 °C for 24 h. The crude product was purified via flash chromatography (Hexanes/EtOAc, 3:2) to provide the title compound as pale yellow oil (1.06 g, 84%). <sup>1</sup>H NMR (400 MHz, CDCl<sub>3</sub>) δ 15.02 (s, 1H), 7.49 (s, 1H), 2.67 (t, *J* = 7.8 Hz, 2H), 1.64-1.53 (m, 2H), 1.34-1.22 (m, 2H), 0.83 (t, *J* = 7.2 Hz, 3H); <sup>13</sup>C NMR (100 MHz, CDCl<sub>3</sub>) 145.0, 129.3, 31.3, 24.3, 22.2, 13.7; IR (film) ν<sub>max</sub> 3747, 3137, 2957, 2865, 2362, 1558, 1460, 1383, 1219, 1111, 975, 849, 668 cm<sup>-1</sup>.

#### 4-Cyclopentyl-1,2,3-triazole (CAS:1231244-99-7)

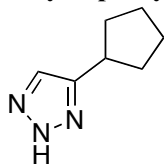

Following general procedure for the synthesis of 4-substituted-1,2,3-triazoles, a mixture of ethynylcyclopentane (500 mg, 5.3 mmol), TMSN<sub>3</sub> (1.07 mL, 7.95 mmol), CuI (42 mg, 0.22 mmol), in DMF/MeOH (4:1, 5 mL) was heated to 100 °C for 18 h. The crude product was purified via flash chromatography (Hexanes/EtOAc, 3:2) to provide the title compound as pale yellow oil (582 mg, 80%). <sup>1</sup>H NMR (400 MHz, CDCl<sub>3</sub>) δ 15.17 (s, 1H), 7.46 (s, 1H), 3.18-3.06 (m, 1H), 2.08-1.93 (m, 2H), 1.71-1.46 (m, 6H); <sup>13</sup>C NMR (100 MHz, CDCl<sub>3</sub>) 148.8, 127.9, 35.6, 33.0, 25.0; IR (film) ν<sub>max</sub> 3747, 3137, 2957, 2865, 2362, 1558, 1460, 1383, 1219, 1111, 975, 849, 668 cm<sup>-1</sup>.

#### *tert*-Butyl ((1,2,3-triazol-4-yl)methyl)carbamate (CAS:1009101-68-1)

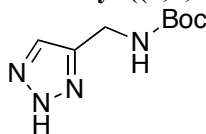

Following general procedure for the synthesis of 4-substituted-1,2,3-triazoles, a mixture of *N*-Boc-propargylamine (1.59 g, 10 mmol), TMSN<sub>3</sub> (2.0 mL, 15 mmol), CuI (95 mg, 0.5 mmol), in DMF/MeOH (4:1, 10 mL) was heated to 100 °C for 18 h. The crude product was purified via flash chromatography (Hexanes/EtOAc, 1:1) to provide the title compound as a white solid (1.38 g, 69%). mp 80-81 °C. <sup>1</sup>H NMR (400 MHz, CDCl<sub>3</sub>) δ 14.41 (s, 1H), 7.62 (s, 1H), 5.76 (br, 1H), 4.40 (d, *J* = 5.2 Hz, 2H), 1.37 (s, 9H); <sup>13</sup>C NMR (100 MHz, CDCl<sub>3</sub>) 156.5, 144.8, 131.6, 80.2, 35.7, 28.5; IR (film) ν<sub>max</sub> 3747, 3145, 2934, 2869, 2361, 1686, 1521, 1456, 1367, 1280, 1170, 1020, 932, 860, 772, 667 cm<sup>-1</sup>; Anal. Calcd. For C<sub>8</sub>H<sub>14</sub>N<sub>4</sub>O<sub>2</sub>: C, 48.47; H, 7.12. Found: C, 48.66; H, 6.96.

#### 4-((Benzyloxy)methyl)-1,2,3-triazole (CAS:796034-32-7)

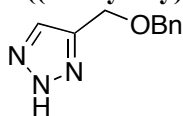

Following general procedure for the synthesis of 4-substituted-1,2,3-triazoles, a mixture of benzyl 2-propynyl ether (1.44 mL, 10 mmol), TMSN<sub>3</sub> (2.0 mL, 15 mmol), CuI (95 mg, 0.5 mmol), in DMF/MeOH (4:1, 10 mL) was heated to 100 °C for 18 h. The crude product was purified via flash chromatography (Hexanes/EtOAc, 1:1) to provide the title compound as a white solid (1.5 g, 79%). mp 51-53 °C. <sup>1</sup>H NMR (400 MHz, CDCl<sub>3</sub>) δ 14.87 (s, 1H), 7.73 (s, 1H), 7.41-7.22 (m, 5H), 4.73 (s, 2H), 4.59 (s, 2H); <sup>13</sup>C NMR (100 MHz, CDCl<sub>3</sub>) 143.1, 137.3, 128.4, 127.9, 127.8, 127.7, 72.4, 62.7; IR (film) ν<sub>max</sub> 3754, 3145, 2865, 2362, 1651, 1559, 1496, 1454, 1362, 1212, 1099, 1027, 742, 698, 603 cm<sup>-1</sup>; Anal. Calcd. For C<sub>10</sub>H<sub>11</sub>N<sub>3</sub>O: C, 63.48; H, 5.86. Found: C, 63.51; H, 6.01.

#### General Procedure for *N*-arylation of 1,2,3-triazoles

An oven-dried vial was equipped with a magnetic stir bar and charged with Pd<sub>2</sub>(dba)<sub>3</sub> and **L1**. The vial was sealed with a screw-cap septum, and then evacuated and backfilled with argon (this process was

repeated a total of 3 times). Toluene (0.5 mL) was added to the vial via syringe. The resulting dark purple mixture was stirred at 120 °C for 3 min, at this point the color of the mixture turned to dark brown. A second oven-dried vial, which was equipped with stir bar, was charged with K<sub>3</sub>PO<sub>4</sub> (424 mg, 2.0 mmol) (aryl halides and 1,2,3-triazoles that were solid at room temperature were added at this point). The vial was sealed with a screw-cap septum, and then evacuated and backfilled with argon (this process was repeated a total of 3 times) and then 1,2,3-triazole (1.2 mmol) and aryl halide (1.0 mmol) were added by syringe and the premixed catalyst solution and toluene (0.5 mL) was added by syringe to the second vial (total 1.0 mL toluene). The reaction mixture was heated at 120 °C for 5 h. The reaction was cooled to room temperature, diluted with EtOAc, washed with brine, dried over MgSO<sub>4</sub>, concentrated in vacuo and purified via flash chromatography.

### 2-Phenyl-2H-1,2,3-triazole (CAS:51039-49-7)

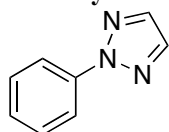

Following general procedure for *N*-arylation of 1,2,3-triazoles, a mixture of bromobenzene (116 μL, 1.0 mmol), 1,2,3-triazole (70 μL, 1.2 mmol), K<sub>3</sub>PO<sub>4</sub> (424 mg, 2.0 mmol), Pd<sub>2</sub>(dba)<sub>3</sub> (6.9 mg, 0.0075 mmol), **L1** (8.6 mg, 0.018 mmol) in toluene (1.0 mL) was heated to 120 °C for 5 h. The crude product was purified via flash chromatography (Hexanes/EtOAc, 9:1) to provide the title compound as colorless oil (130 mg, 90%). <sup>1</sup>H NMR (400 MHz, CDCl<sub>3</sub>) δ 8.12-8.06 (m, 2H), 7.81 (s, 2H), 7.51-7.44 (m, 2H), 7.38-7.32 (m, 1H); <sup>13</sup>C NMR (100 MHz, CDCl<sub>3</sub>) δ 140.0, 135.7, 129.5, 127.7, 119.1; IR (film) ν<sub>max</sub> 3128, 3059, 2362, 1745, 1598, 1500, 1410, 1376, 1259, 1152, 1069, 953, 820, 757, 692, 668, 510, 455 cm<sup>-1</sup>; Anal. Calcd. For C<sub>8</sub>H<sub>7</sub>N<sub>3</sub>: C, 66.19; H, 4.86. Found: C, 66.44; H, 5.03.

### 3-(2H-1,2,3-Triazol-2-yl)benzonitrile

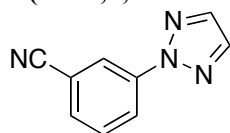

Following general procedure for *N*-arylation of 1,2,3-triazoles, a mixture of 3-bromobenzonitrile (182 mg, 1.0 mmol), 1,2,3-triazole (70 μL, 1.2 mmol), K<sub>3</sub>PO<sub>4</sub> (424 mg, 2.0 mmol), Pd<sub>2</sub>(dba)<sub>3</sub> (4.6 mg, 0.005 mmol), **L1** (4.8 mg, 0.01 mmol) in toluene (1.0 mL) was heated to 120 °C for 5 h. The crude product was purified via flash chromatography (Hexanes/EtOAc, 8:1) to provide the title compound as a white solid (1st run: 153 mg, 90%; 2nd run: 148 mg, 87%), mp 100-101 °C. <sup>1</sup>H NMR (400 MHz, CDCl<sub>3</sub>) δ 8.32 (s, 1H), 8.29-8.24 (m, 1H), 7.80 (s, 2H), 7.59-7.51 (m, 2H); <sup>13</sup>C NMR (100 MHz, CDCl<sub>3</sub>) δ 140.1, 136.5, 130.8, 130.4, 122.9, 122.2, 118.0, 113.6; IR (film) ν<sub>max</sub> 3853, 3744, 3122, 2361, 2232, 1696, 1582, 1478, 1406, 1376, 1259, 1162, 1082, 953, 886, 844, 798, 667, 602, 472 cm<sup>-1</sup>; Anal. Calcd. For C<sub>9</sub>H<sub>6</sub>N<sub>4</sub>: C, 63.52; H, 3.55. Found: C, 63.52; H, 3.51.

### 2-(3-(Benzyloxy)phenyl)-2H-1,2,3-triazole

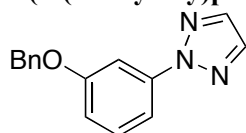

Following general procedure for *N*-arylation of 1,2,3-triazoles, a mixture of 1-(benzyloxy)-3-bromobenzene (263 mg, 1.0 mmol), 1,2,3-triazole (70 μL, 1.2 mmol), K<sub>3</sub>PO<sub>4</sub> (424 mg, 2.0 mmol), Pd<sub>2</sub>(dba)<sub>3</sub> (4.6 mg, 0.005 mmol), **L1** (4.8 mg, 0.01 mmol) in toluene (1.0 mL) was heated to 120 °C for 5 h. The crude product was purified via flash chromatography (Hexanes/EtOAc, 10:1) to provide the title compound as a white solid (1st run: 225 mg, 90%; 2nd run: 226 mg, 90%), mp 70-71 °C. <sup>1</sup>H NMR (400 MHz, CDCl<sub>3</sub>) δ 7.85 (t, *J* = 2.2 Hz, 1H), 7.82 (s, 2H), 7.80-7.76 (m, 1H), 7.53-7.48 (m, 2H), 7.47-7.35 (m, 4H), 7.03-6.98 (m, 1H), 5.16 (s, 2H); <sup>13</sup>C NMR (100 MHz, CDCl<sub>3</sub>) δ 159.6, 141.0, 136.6, 135.6, 130.2, 128.7, 128.1, 127.6, 114.5, 111.5, 105.5, 70.2; IR (film) ν<sub>max</sub> 3845, 3746,

3142, 3066, 2936, 2875, 2362, 1773, 1620, 1495, 1407, 1375, 1295, 1246, 1219, 1168, 1085, 1013, 950, 882, 827, 777, 750, 699, 665, 530  $\text{cm}^{-1}$ ; Anal. Calcd. For  $\text{C}_{15}\text{H}_{13}\text{N}_3\text{O}$ : C, 71.70; H, 5.21. Found: C, 71.90; H, 5.15.

### 2-(3-Nitrophenyl)-2H-1,2,3-triazole (CAS:342623-98-7)

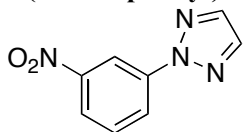

Following general procedure for *N*-arylation of 1,2,3-triazoles, a mixture of 1-bromo-3-nitrobenzene (202 mg, 1.0 mmol), 1,2,3-triazole (70  $\mu\text{L}$ , 1.2 mmol),  $\text{K}_3\text{PO}_4$  (424 mg, 2.0 mmol),  $\text{Pd}_2(\text{dba})_3$  (2.3 mg, 0.0025 mmol), **L1** (2.4 mg, 0.005 mmol) in toluene (1.0 mL) was heated to 120  $^\circ\text{C}$  for 5 h. The crude product was purified via flash chromatography (Hexanes/EtOAc, 9:1) to provide the title compound as a pale yellow solid (1st run: 167 mg, 88%; 2nd run: 164 mg, 86%), mp 126-127  $^\circ\text{C}$ .  $^1\text{H}$  NMR (400 MHz,  $\text{CDCl}_3$ )  $\delta$  8.91 (t,  $J = 2.0$  Hz, 1H), 8.43-8.37 (m, 1H), 8.19-8.15 (m, 1H), 7.86 (s, 2H), 7.65 (t,  $J = 8.0$  Hz, 1H);  $^{13}\text{C}$  NMR (100 MHz,  $\text{CDCl}_3$ )  $\delta$  149.0, 140.6, 136.7, 130.5, 124.4, 122.0, 114.2; IR (film)  $\nu_{\text{max}}$  3854, 375, 3128, 2362, 1698, 1652, 1520, 1406, 1381, 1348, 1069, 954, 893, 839, 808, 736, 658, 466  $\text{cm}^{-1}$ .

### 2-(3-Chlorophenyl)-2H-1,2,3-triazole (CAS:59067-28-6)

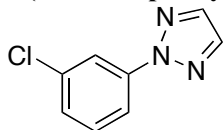

Following general procedure for *N*-arylation of 1,2,3-triazoles, a mixture of 1-bromo-3-chlorobenzene (191 mg, 1.0 mmol), 1,2,3-triazole (70  $\mu\text{L}$ , 1.2 mmol),  $\text{K}_3\text{PO}_4$  (424 mg, 2.0 mmol),  $\text{Pd}_2(\text{dba})_3$  (2.3 mg, 0.0025 mmol), **L1** (2.4 mg, 0.005 mmol) in toluene (1.0 mL) was heated to 120  $^\circ\text{C}$  for 5 h. The crude product was purified via flash chromatography (Hexanes/EtOAc, 5:1) to provide the title compound as a white solid (1st run: 163 mg, 91%; 2nd run: 161 mg, 90%), mp 38-40  $^\circ\text{C}$ .  $^1\text{H}$  NMR (400 MHz,  $\text{CDCl}_3$ )  $\delta$  8.11 (t,  $J = 2.0$  Hz, 1H), 7.99-7.94 (m, 1H), 7.80 (s, 2H), 7.41-7.35 (m, 1H), 7.33-7.27 (m, 1H);  $^{13}\text{C}$  NMR (100 MHz,  $\text{CDCl}_3$ )  $\delta$  140.8, 136.1, 135.3, 130.5, 127.7, 119.4, 117.1; IR (film)  $\nu_{\text{max}}$  3747, 3081, 2361, 1594, 1486, 1438, 1408, 1373, 1261, 1153, 1105, 1074, 953, 869, 826, 778, 666, 488  $\text{cm}^{-1}$ ; Anal. Calcd. For  $\text{C}_8\text{H}_6\text{N}_2\text{Cl}$ : C, 53.50; H, 3.37. Found: C, 53.79; H, 3.40.

### 2-(3-(1,3-Dioxolan-2-yl)phenyl)-2H-1,2,3-triazole

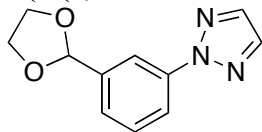

Following general procedure for *N*-arylation of 1,2,3-triazoles, a mixture of 2-(3-bromophenyl)-1,3-dioxolane (151  $\mu\text{L}$ , 1.0 mmol), 1,2,3-triazole (70  $\mu\text{L}$ , 1.2 mmol),  $\text{K}_3\text{PO}_4$  (424 mg, 2.0 mmol),  $\text{Pd}_2(\text{dba})_3$  (4.6 mg, 0.005 mmol), **L1** (4.8 mg, 0.01 mmol) in toluene (1.0 mL) was heated to 120  $^\circ\text{C}$  for 5 h. The crude product was purified via flash chromatography (Hexanes/EtOAc, 6:1) to provide the title compound colorless oil (1st run: 189 mg, 88%; 2nd run 184 mg, 85%).  $^1\text{H}$  NMR (400 MHz,  $\text{CDCl}_3$ )  $\delta$  8.23-8.21 (m, 1H), 8.10-8.05 (m, 1H), 7.79 (s, 2H), 7.51-7.43 (m, 2H), 5.88 (s, 1H), 4.15-3.99 (m, 4H);  $^{13}\text{C}$  NMR (100 MHz,  $\text{CDCl}_3$ )  $\delta$  140.1, 139.9, 135.8, 129.6, 125.8, 119.7, 117.2, 103.2, 65.5; IR (film)  $\nu_{\text{max}}$  3745, 3132, 2960, 2888, 2362, 1597, 1478, 1406, 1260, 1209, 1081, 960, 889, 825, 797, 701, 671, 477  $\text{cm}^{-1}$ ; Anal. Calcd. For  $\text{C}_{11}\text{H}_{11}\text{N}_3\text{O}_2$ : C, 60.82; H, 5.10. Found: C, 61.08; H, 5.14.

### Methyl 5-(2H-1,2,3-triazol-2-yl)nicotinate

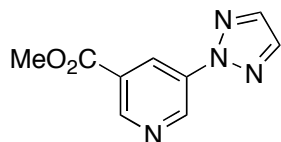

Following general procedure for *N*-arylation of 1,2,3-triazoles, a mixture of methyl 5-bromonicotinate (216 mg, 1.0 mmol), 1,2,3-triazole (70  $\mu$ L, 1.2 mmol),  $K_3PO_4$  (424 mg, 2.0 mmol),  $Pd_2(dba)_3$  (4.6 mg, 0.005 mmol), **L1** (4.8 mg, 0.01 mmol) in toluene (1.0 mL) was heated to 120  $^\circ$ C for 5 h. The crude product was purified via flash chromatography (Hexanes/EtOAc, 5:1) to provide the title compound as a white solid (1st run: 172 mg, 84%; 2nd run: 168 mg, 82%), mp 99-100  $^\circ$ C.  $^1H$  NMR (400 MHz,  $CDCl_3$ )  $\delta$  9.48-9.45 (m, 1H), 9.14-9.11 (m, 1H), 8.88-8.84 (m, 1H), 7.84 (s, 2H), 3.95 (s, 3H);  $^{13}C$  NMR (100 MHz,  $CDCl_3$ )  $\delta$  165.0, 149.3, 144.0, 136.8, 136.1, 126.8, 126.6, 52.8; IR (film)  $\nu_{max}$  3745, 2361, 1721, 1569, 1459, 1384, 1315, 1276, 1105, 946, 842, 758, 666  $cm^{-1}$ ; Anal. Calcd. For  $C_9H_8N_4O_2$ : C, 52.94; H, 3.95. Found: C, 53.11; H, 3.93.

#### 4-(2*H*-1,2,3-Triazol-2-yl)benzaldehyde

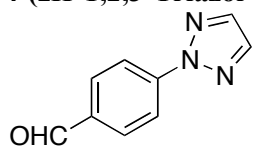

Following general procedure for *N*-arylation of 1,2,3-triazoles, a mixture of 4-bromobenzaldehyde (185 mg, 1.0 mmol), 1,2,3-triazole (70  $\mu$ L, 1.2 mmol),  $K_3PO_4$  (424 mg, 2.0 mmol),  $Pd_2(dba)_3$  (4.6 mg, 0.005 mmol), **L1** (4.8 mg, 0.01 mmol) in toluene (1.0 mL) was heated to 120  $^\circ$ C for 5 h. The crude product was purified via flash chromatography (Hexanes/EtOAc, 6:1) to provide the title compound as a white solid (1st Run: 132 mg, 77%; 2nd run: 141 mg, 81%), mp 100-102  $^\circ$ C.  $^1H$  NMR (400 MHz,  $CDCl_3$ )  $\delta$  9.99 (s, 1H), 8.21 (d,  $J$  = 8.8 Hz, 2H), 7.95 (d,  $J$  = 8.4 Hz, 2H), 7.83 (s, 2H);  $^{13}C$  NMR (100 MHz,  $CDCl_3$ )  $\delta$  191.1, 143.7, 136.7, 135.1, 131.2, 119.2; IR (film)  $\nu_{max}$  3853, 3745, 2361, 1694, 1601, 1508, 1383, 1206, 1154, 1103, 949, 830, 666, 505, 461,  $cm^{-1}$ ; Anal. Calcd. For  $C_9H_7N_3O$ : C, 62.42; H, 4.07. Found: C, 62.66; H, 4.04.

#### 2-(4-Cyclohexylphenyl)-2*H*-1,2,3-triazole

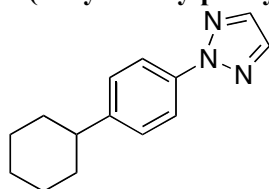

Following general procedure for *N*-arylation of 1,2,3-triazoles, a mixture of 1-bromo-4-cyclohexylbenzene (239 mg, 1.0 mmol), 1,2,3-triazole (70  $\mu$ L, 1.2 mmol),  $K_3PO_4$  (424 mg, 2.0 mmol),  $Pd_2(dba)_3$  (6.9 mg, 0.0075 mmol), **L1** (8.6 mg, 0.018 mmol) in toluene (1.0 mL) was heated to 120  $^\circ$ C for 5 h. The crude product was purified via flash chromatography (Hexanes/EtOAc, 10:1) to provide the title compound as a white solid (1st run: 177 mg, 78%; 2nd run: 174mg, 77%), mp 46-48  $^\circ$ C.  $^1H$  NMR (400 MHz,  $CDCl_3$ )  $\delta$  8.01 (d,  $J$  = 8.8 Hz, 2H), 7.78 (s, 2H), 7.31 (d,  $J$  = 8.4 Hz, 2H), 2.60-2.50 (m, 1H), 1.96-1.71 (m, 5H), 1.50-1.20 (m, 5H);  $^{13}C$  NMR (100 MHz,  $CDCl_3$ )  $\delta$  147.7, 138.0, 135.3, 127.7, 119.0, 44.2, 34.5, 26.9, 26.2; IR (film)  $\nu_{max}$  3745, 2925, 2853, 2361, 1514, 1448, 1412, 1382, 1259, 1151, 953, 830, 673, 543,  $cm^{-1}$ ; Anal. Calcd. For  $C_{14}H_{17}N_3$ : C, 73.98; H, 7.54. Found: C, 74.17; H, 7.47.

#### 1-(4-(2*H*-1,2,3-Triazol-2-yl)phenyl)butan-1-one

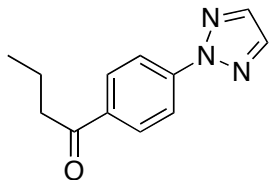

Following general procedure for *N*-arylation of 1,2,3-triazoles, a mixture of 1-(4-chlorophenyl)butan-1-one (183 mg, 1.0 mmol), 1,2,3-triazole (70  $\mu$ L, 1.2 mmol),  $K_3PO_4$  (424 mg, 2.0 mmol),  $Pd_2(dba)_3$  (2.3 mg, 0.0025 mmol), **L1** (2.4 mg, 0.005 mmol) in toluene (1.0 mL) was heated to 120  $^{\circ}C$  for 5 h. The crude product was purified via flash chromatography (Hexanes/EtOAc, 8:1) to provide the title compound as a white solid (1st run: 180 mg, 84%; 2nd run: 181mg, 84%), mp 64-66  $^{\circ}C$ .  $^1H$  NMR (400 MHz,  $CDCl_3$ )  $\delta$  8.10 (d,  $J = 9.2$  Hz, 2H), 8.01 (d,  $J = 9.2$  Hz, 2H), 7.78 (s, 2H), 2.90 (t,  $J = 7.2$  Hz, 2H), 1.79-1.66 (m, 2H), 0.96 (t,  $J = 7.2$  Hz, 3H);  $^{13}C$  NMR (100 MHz,  $CDCl_3$ )  $\delta$  199.0, 142.6, 136.3, 135.8, 129.5, 118.6, 40.6, 17.7, 13.9; IR (film)  $\nu_{max}$  3745, 3122, 2959, 2359, 1937, 1675, 1600, 1511, 1457, 1386, 1308, 1213, 1170, 1107, 1052, 949, 906, 832, 738, 665, 569, 468  $cm^{-1}$ ; Anal. Calcd. For  $C_{12}H_{13}N_3O$ : C, 66.96; H, 6.09. Found: C, 67.25; H, 6.05.

#### Ethyl 4-(2*H*-1,2,3-triazol-2-yl)benzoate

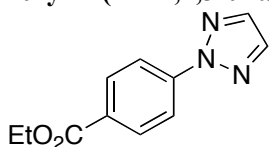

Following general procedure for *N*-arylation of 1,2,3-triazoles, a mixture of ethyl 4-chlorobenzoate (156  $\mu$ L, 1.0 mmol), 1,2,3-triazole (70  $\mu$ L, 1.2 mmol),  $K_3PO_4$  (424 mg, 2.0 mmol),  $Pd_2(dba)_3$  (3.2 mg, 0.0035 mmol), **L1** (3.4 mg, 0.007 mmol) in toluene (1.0 mL) was heated to 120  $^{\circ}C$  for 5 h. The crude product was purified via flash chromatography (Hexanes/EtOAc, 8:1) to provide the title compound as a white solid (1st run: 180 mg, 83%; 2nd run: 177 mg, 82%), mp 49-51  $^{\circ}C$ .  $^1H$  NMR (400 MHz,  $CDCl_3$ )  $\delta$  8.11-8.08 (s, 4H), 7.78 (s, 2H), 4.34 (q,  $J = 7.2$  Hz, 2H), 1.35 (t,  $J = 7.2$  Hz, 3H);  $^{13}C$  NMR (100 MHz,  $CDCl_3$ )  $\delta$  165.8, 142.7, 136.3, 130.9, 129.4, 118.5, 61.2, 14.4; IR (film)  $\nu_{max}$  3117, 2973, 2360, 1713, 1608, 1508, 1466, 1410, 1281, 1104, 1019, 951, 852, 815, 763, 681, 503, 451  $cm^{-1}$ ; Anal. Calcd. For  $C_{11}H_{11}N_3O_2$ : C, 60.82; H, 5.10. Found: C, 61.10; H, 5.08.

#### 2-(2*H*-1,2,3-Triazol-2-yl)benzonitrile

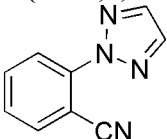

Following general procedure for *N*-arylation of 1,2,3-triazoles, a mixture of 2-chlorobenzonitrile (138 mg, 1.0 mmol), 1,2,3-triazole (70  $\mu$ L, 1.2 mmol),  $K_3PO_4$  (424 mg, 2.0 mmol),  $Pd_2(dba)_3$  (9.2 mg, 0.01 mmol), **L1** (9.7 mg, 0.02 mmol) in toluene (1.0 mL) was heated to 120  $^{\circ}C$  for 5 h. The crude product was purified via flash chromatography (Hexanes/EtOAc, 7:1) to provide the title compound as a white solid (1st run: 78 mg, 46%; 2nd run: 76 mg, 45%), mp 125-126  $^{\circ}C$ .  $^1H$  NMR (400 MHz,  $CDCl_3$ )  $\delta$  8.10-8.05 (m, 1H), 7.92 (s, 2H), 7.84-7.79 (m, 1H), 7.74-7.67 (m, 1H), 7.49-7.43 (m, 1H);  $^{13}C$  NMR (100 MHz,  $CDCl_3$ )  $\delta$  140.5, 136.9, 135.3, 133.9, 128.1, 122.8, 117.0, 104.9; IR (film)  $\nu_{max}$  2960, 2361, 1696, 1651, 1559, 1499, 1457, 1383, 1261, 1073, 950, 821, 759, 667, 555, 498  $cm^{-1}$ .

#### 2-(4-Methoxyphenyl)-2*H*-1,2,3-triazole (CAS:68535-51-3)

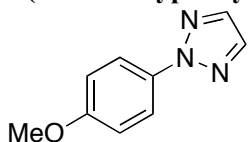

Following general procedure for *N*-arylation of 1,2,3-triazoles, a mixture of 4-methoxyphenyl trifluoromethanesulfonate (256 mg, 1.0 mmol), 1,2,3-triazole (70  $\mu$ L, 1.2 mmol),  $K_3PO_4$  (424 mg, 2.0 mmol),  $Pd_2(dba)_3$  (6.9 mg, 0.0075 mmol), **L1** (8.6 mg, 0.018 mmol) in toluene (1.0 mL) was heated to 120  $^\circ C$  for 5 h. The crude product was purified via flash chromatography (Hexanes/EtOAc, 8:1) to provide the title compound as colorless oil (1st run: 158 mg, 90%; 2nd run: 155 mg, 89%).  $^1H$  NMR (400 MHz,  $CDCl_3$ )  $\delta$  7.98 (d,  $J = 9.2$  Hz, 2H), 7.75 (s, 2H), 6.97 (d,  $J = 9.2$  Hz, 2H), 3.81 (s, 3H);  $^{13}C$  NMR (100 MHz,  $CDCl_3$ )  $\delta$  159.1, 135.2, 133.9, 120.5, 114.5, 55.6; IR (film)  $\nu_{max}$  3745, 2955, 2838, 2360, 1609, 1512, 1459, 1412, 1302, 1249, 1171, 1096, 1029, 953, 829, 671, 622, 526  $cm^{-1}$ ; Anal. Calcd. For  $C_9H_9N_3O$ : C, 61.70; H, 5.18. Found: C, 61.89; H, 5.21.

### 6-(2*H*-1,2,3-Triazol-2-yl)quinoline

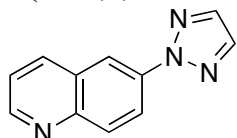

Following general procedure for *N*-arylation of 1,2,3-triazoles, a mixture of quinolin-6-yl trifluoromethanesulfonate (277 mg, 1.0 mmol), 1,2,3-triazole (70  $\mu$ L, 1.2 mmol),  $K_3PO_4$  (424 mg, 2.0 mmol),  $Pd_2(dba)_3$  (2.3 mg, 0.0025 mmol), **L1** (2.4 mg, 0.005 mmol) in toluene (1.0 mL) was heated to 120  $^\circ C$  for 5 h. The crude product was purified via flash chromatography (Hexanes/EtOAc, 3:2) to provide the title compound as a white solid (1st run: 183 mg, 91%; 2nd run: 177 mg, 90%), mp 75-76  $^\circ C$ .  $^1H$  NMR (400 MHz,  $CDCl_3$ )  $\delta$  8.89-8.85 (m, 1H), 8.49-8.36 (m, 2H), 8.20-8.12 (m, 2H), 7.80 (s, 2H), 7.40-7.33 (m, 1H);  $^{13}C$  NMR (100 MHz,  $CDCl_3$ )  $\delta$  150.7, 147.2, 137.6, 136.5, 136.1, 130.9, 128.4, 122.1, 121.5, 116.2; IR (film)  $\nu_{max}$  3745, 3123, 2361, 1696, 1625, 1560, 1505, 1377, 1308, 1259, 1116, 1074, 954, 872, 826, 790, 667, 469  $cm^{-1}$ .

### 2,4-Diphenyl-2*H*-1,2,3-triazole (CAS:20034-95-1)

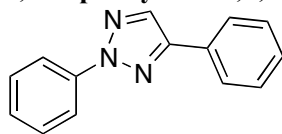

Following general procedure for *N*-arylation of 1,2,3-triazoles, a mixture of bromobenzene (106  $\mu$ L, 1.0 mmol), 4-phenyl-1,2,3-triazole (174 mg, 1.2 mmol),  $K_3PO_4$  (424 mg, 2.0 mmol),  $Pd_2(dba)_3$  (6.9 mg, 0.0075 mmol), **L1** (8.6 mg, 0.018 mmol) in toluene (1.0 mL) was heated to 120  $^\circ C$  for 5 h. The crude product was purified via flash chromatography (Hexanes/EtOAc, 20:1) to provide the title compound as a white solid (1st run: 200 mg, 90%; 2nd run: 196 mg, 89%), mp 41-42  $^\circ C$ .  $^1H$  NMR (400 MHz,  $CDCl_3$ )  $\delta$  8.25-8.20 (m, 2H), 8.09 (s, 1H), 7.98-7.94 (m, 2H), 7.56-7.47 (m, 4H), 7.46-7.35 (m, 2H);  $^{13}C$  NMR (100 MHz,  $CDCl_3$ )  $\delta$  148.9, 140.0, 132.6, 130.1, 129.3, 129.0, 128.9, 127.4, 126.2, 118.8; IR (film)  $\nu_{max}$  3853, 3746, 3067, 2335, 1950, 1698, 1597, 1498, 458, 1389, 1343, 1072, 971, 912, 845, 761, 690, 661, 500  $cm^{-1}$ ; Anal. Calcd. For  $C_{14}H_{11}N_3$ : C, 76.00; H, 5.01. Found: C, 75.73; H, 5.11.

### 5-(4-(2,4-Difluorophenyl)-2*H*-1,2,3-triazol-2-yl)pyrimidine

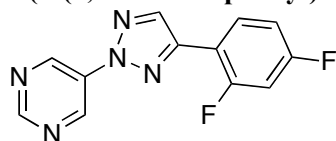

Following general procedure for *N*-arylation of 1,2,3-triazoles, a mixture of 5-bromopyrimidine (159 mg, 1.0 mmol), 4-(2,4-difluorophenyl)-1,2,3-triazole (217 mg, 1.2 mmol),  $K_3PO_4$  (424 mg, 2.0 mmol),  $Pd_2(dba)_3$  (4.6 mg, 0.005 mmol), **L1** (4.8 mg, 0.01 mmol) in toluene (1.0 mL) was heated to 120  $^\circ C$  for 5 h. The crude product was purified via flash chromatography (Hexanes/EtOAc, 3:1) to provide the title compound as a white solid (1st run: 233 mg, 90%; 2nd run: 230 mg, 89%), mp 118-120  $^\circ C$ .  $^1H$  NMR (400 MHz,  $CDCl_3$ )  $\delta$  9.42 (s, 2H), 9.17 (s, 1H), 8.16 (d,  $J = 4.0$  Hz, 1H), 8.09-8.00



(m, 1H), 7.00-6.87 (m, 2H);  $^{13}\text{C}$  NMR (100 MHz,  $\text{CDCl}_3$ )  $\delta$  163.5 (dd,  $J = 12, 251$  Hz), 160.5 (dd,  $J = 12, 252$  Hz), 157.2, 146.9, 144.4, 136.3 (d,  $J = 12$  Hz), 134.3, 129.7 (dd,  $J = 4, 9$  Hz), 113.7 (dd,  $J = 4, 13$  Hz), 112.5 (dd,  $J = 3, 21$  Hz), 104.7 (t,  $J = 25$  Hz); IR (film)  $\nu_{\text{max}}$  3745, 3030, 2362, 1565, 1420, 1385, 1267, 1080, 960, 850, 713, 656, 621, 487  $\text{cm}^{-1}$ ; Anal. Calcd. For  $\text{C}_{12}\text{H}_7\text{F}_2\text{N}_5$ : C, 55.60; H, 2.72. Found: C, 55.74; H, 2.66.

### 3-(2-(3,5-Dimethoxyphenyl)-2H-1,2,3-triazol-4-yl)pyridine

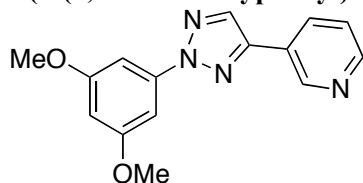

Following general procedure for *N*-arylation of 1,2,3-triazoles, a mixture of 3,5-dimethoxybromobenzene (217 mg, 1.0 mmol), 3-(1,2,3-triazol-4-yl)pyridine (175 mg, 1.2 mmol),  $\text{K}_3\text{PO}_4$  (424 mg, 2.0 mmol),  $\text{Pd}_2(\text{dba})_3$  (6.9 mg, 0.0075 mmol), **L1** (8.6 mg, 0.018 mmol) in toluene (1.0 mL) was heated to 120  $^\circ\text{C}$  for 5 h. The crude product was purified via flash chromatography (Hexanes/EtOAc, 1:2) to provide the title compound as a white solid (1st run: 242 mg, 86%; 2nd run: 245 mg, 87%), mp 119-121  $^\circ\text{C}$ .  $^1\text{H}$  NMR (400 MHz,  $\text{CDCl}_3$ )  $\delta$  9.06 (d,  $J = 3.6$  Hz, 1H), 8.59-8.55 (m, 1H), 8.16-8.08 (m, 1H), 8.04-8.00 (m, 1H), 7.38-7.22 (m, 3H), 6.43-6.38 (m, 1H), 3.82 (s, 6H);  $^{13}\text{C}$  NMR (100 MHz,  $\text{CDCl}_3$ )  $\delta$  161.4, 150.0, 147.5, 145.9, 141.2, 133.4, 132.6, 126.2, 123.8, 100.2, 97.3, 55.7; IR (film)  $\nu_{\text{max}}$  3676, 3364, 2958, 2361, 1602, 1481, 1424, 1385, 1264, 1208, 1154, 1065, 1039, 978, 818, 702, 664, 533  $\text{cm}^{-1}$ ; Anal. Calcd. For  $\text{C}_{15}\text{H}_{14}\text{N}_4\text{O}_2$ : C, 63.82; H, 5.00. Found: C, 63.95; H, 5.02.

### 4-(4-Pyridin-3-yl-[1,2,3]triazol-2-yl)-benzoic acid ethyl ester

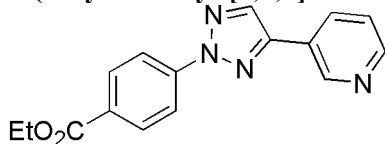

Following general procedure for *N*-arylation of 1,2,3-triazoles, a mixture of ethyl 4-bromobenzoate (163  $\mu\text{L}$ , 1.0 mmol), 3-(1,2,3-triazol-4-yl)pyridine (175 mg, 1.2 mmol),  $\text{K}_3\text{PO}_4$  (424 mg, 2.0 mmol),  $\text{Pd}_2(\text{dba})_3$  (2.3 mg, 0.0025 mmol), **L1** (2.4 mg, 0.005 mmol) in toluene (1.0 mL) was heated to 120  $^\circ\text{C}$  for 5 h. The crude product was purified via flash chromatography (Hexanes/EtOAc, 3:1) to provide the title compound as a white solid (1st run: 253 mg, 86%; 2nd run: 246 mg, 84%), mp 110-112  $^\circ\text{C}$ .  $^1\text{H}$  NMR (400 MHz,  $\text{CDCl}_3$ )  $\delta$  9.01 (t,  $J = 1.2$  Hz, 1H), 8.57-8.52 (m, 1H), 8.08-8.00 (m, 6H), 7.28 (dd,  $J = 4.8, 8.0$  Hz, 1H), 4.30 (q,  $J = 7.2$ , 3H), 1.33 (t,  $J = 7.2$ , 3H);  $^{13}\text{C}$  NMR (100 MHz,  $\text{CDCl}_3$ )  $\delta$  165.6, 150.1, 147.4, 146.6, 142.3, 133.3, 133.3, 130.9, 129.4, 125.7, 123.8, 118.3, 61.2, 14.3; IR (film)  $\nu_{\text{max}}$  3414, 2976, 2362, 1715, 1607, 1511, 1424, 1394, 1279, 1105, 1023, 1105, 1023, 964, 855, 813, 764, 702, 492  $\text{cm}^{-1}$ .

### 4-Butyl-2-phenyl-2H-1,2,3-triazole

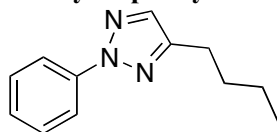

Following general procedure for *N*-arylation of 1,2,3-triazoles, a mixture of bromobenzene (106  $\mu\text{L}$ , 1.0 mmol), 4-butyl-1,2,3-triazole (150 mg, 1.2 mmol),  $\text{K}_3\text{PO}_4$  (424 mg, 2.0 mmol),  $\text{Pd}_2(\text{dba})_3$  (6.9 mg, 0.0075 mmol), **L1** (8.6 mg, 0.018 mmol) in toluene (1.0 mL) was heated to 120  $^\circ\text{C}$  for 5 h. The crude product was purified via flash chromatography (Hexanes/EtOAc, 40:1) to provide the title compound as colorless oil (1st run: 185 mg, 92%; 2nd run: 180 mg, 90%).  $^1\text{H}$  NMR (400 MHz,  $\text{CDCl}_3$ )  $\delta$  8.08-8.02 (m, 2H), 7.57 (s, 1H), 7.48-7.41 (m, 2H), 7.33-7.26 (m, 1H), 2.76 (t,  $J = 8.0$  Hz, 2H), 1.76-1.66 (m, 2H), 1.48-1.36 (m, 2H), 0.96 (t,  $J = 7.4$  Hz, 3H);  $^{13}\text{C}$  NMR (100 MHz,  $\text{CDCl}_3$ )  $\delta$  150.3, 140.1, 134.4, 129.3, 127.1, 118.7, 31.4, 25.4, 22.5, 14.0; IR (film)  $\nu_{\text{max}}$  3055, 2956, 2931,

2362, 1598, 1500, 1462, 1341, 1236, 1161, 1070, 1030, 964, 843, 756, 691, 663, 508  $\text{cm}^{-1}$ ; Anal. Calcd. For  $\text{C}_{12}\text{H}_{15}\text{N}_3$ : C, 71.61; H, 7.51. Found: C, 71.48; H, 7.49.

### Methyl 3-(4-cyclopentyl-2H-1,2,3-triazol-2-yl)benzoate

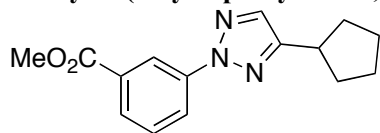

Following general procedure for *N*-arylation of 1,2,3-triazoles, a mixture of methyl 3-bromobenzoate (215 mg, 1.0 mmol), 4-cyclopentyl-1,2,3-triazole (164 mg, 1.2 mmol),  $\text{K}_3\text{PO}_4$  (424 mg, 2.0 mmol),  $\text{Pd}_2(\text{dba})_3$  (4.3 mg, 0.005 mmol), **L1** (4.8 mg, 0.01 mmol) in toluene (1.0 mL) was heated to 120  $^\circ\text{C}$  for 5 h. The crude product was purified via flash chromatography (Hexanes/EtOAc, 30:1) to provide the title compound as colorless oil (1st run: 260 mg, 95%; 2nd run: 249 mg, 92%).  $^1\text{H}$  NMR (400 MHz,  $\text{CDCl}_3$ )  $\delta$  8.63 (t,  $J = 2.0$  Hz, 1H), 8.18-8.14 (m, 1H), 7.92-7.88 (m, 1H), 7.54 (s, 1H), 7.48-7.42 (m, 1H), 3.89 (s, 3H), 3.21-3.11 (m, 1H), 2.12-2.00 (m, 2H), 1.79-1.58 (m, 6H);  $^{13}\text{C}$  NMR (100 MHz,  $\text{CDCl}_3$ )  $\delta$  166.3, 154.8, 140.1, 133.7, 131.4, 129.3, 127.8, 122.6, 119.5, 52.3, 36.7, 33.1, 25.3; IR (film)  $\nu_{\text{max}}$  3436, 3087, 2954, 2361, 1723, 1595, 1458, 1364, 1268, 1078, 1035, 964, 908, 845, 751, 662, 539  $\text{cm}^{-1}$ ; Anal. Calcd. For  $\text{C}_{15}\text{H}_{17}\text{N}_3\text{O}_2$ : C, 66.40; H, 6.32. Found: C, 66.62; H, 6.23.

### *tert*-Butyl ((2-(3-(benzyloxy)phenyl)-2H-1,2,3-triazol-4-yl)methyl)carbamate

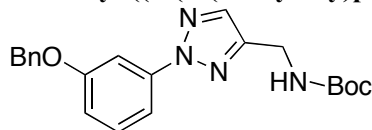

Following general procedure for *N*-arylation of 1,2,3-triazoles, a mixture of 3-benzyloxybromobenzene (261 mg, 1.0 mmol), *tert*-butyl ((1,2,3-triazol-4-yl)methyl)carbamate (238 mg, 1.2 mmol),  $\text{K}_3\text{PO}_4$  (424 mg, 2.0 mmol),  $\text{Pd}_2(\text{dba})_3$  (6.9 mg, 0.0075 mmol), **L1** (8.6 mg, 0.018 mmol) in toluene (1.0 mL) was heated to 120  $^\circ\text{C}$  for 5 h. The crude product was purified via flash chromatography (Hexanes/EtOAc, 6:1) to provide the title compound as a white solid (1st run: 342 mg, 90%; 2nd run: 345 mg, 91%), mp 90-91  $^\circ\text{C}$ .  $^1\text{H}$  NMR (400 MHz,  $\text{CDCl}_3$ )  $\delta$  7.74-7.68 (m, 2H), 7.65-7.61 (m, 1H), 7.47-7.29 (m, 6H), 6.92 (dd,  $J = 2.0, 8.0$  Hz, 1H), 5.43 (br, 1H), 5.08 (s, 2H), 4.45 (d,  $J = 5.6$  Hz, 2H), 1.48 (s, 9H);  $^{13}\text{C}$  NMR (100 MHz,  $\text{CDCl}_3$ )  $\delta$  159.5, 155.9, 147.4, 140.8, 136.5, 134.3, 130.1, 128.6, 128.1, 127.5, 114.2, 111.2, 79.8, 70.2, 36.2, 28.4; IR (film)  $\nu_{\text{max}}$  3349, 2977, 2932, 2362, 1706, 1605, 1497, 1458, 1368, 1244, 1167, 1024, 972, 858, 755, 696, 666, 458  $\text{cm}^{-1}$ ; Anal. Calcd. For  $\text{C}_{21}\text{H}_{24}\text{N}_4\text{O}_3$ : C, 66.30; H, 6.36. Found: C, 66.21; H, 6.30.

### *tert*-Butyl ((2-(3-(benzyloxy)phenyl)-2H-1,2,3-triazol-4-yl)methyl)carbamate

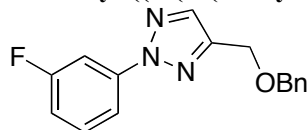

Following general procedure for *N*-arylation of 1,2,3-triazoles, a mixture of 3-bromofluorobenzene (112  $\mu\text{L}$ , 1.0 mmol), 4-((benzyloxy)methyl)-1,2,3-triazole (227 mg, 1.2 mmol),  $\text{K}_3\text{PO}_4$  (424 mg, 2.0 mmol),  $\text{Pd}_2(\text{dba})_3$  (6.9 mg, 0.0075 mmol), **L1** (8.6 mg, 0.018 mmol) in toluene (1.0 mL) was heated to 120  $^\circ\text{C}$  for 5 h. The crude product was purified via flash chromatography (Hexanes/EtOAc, 10:1) to provide the title compound as colorless oil (1st run: 252 mg, 94%; 2nd run: 279 mg, 93%).  $^1\text{H}$  NMR (400 MHz,  $\text{CDCl}_3$ )  $\delta$  7.93-7.89 (m, 1H), 7.89-7.83 (m, 2H), 7.46-7.32 (m, 6H), 7.08-7.02 (m, 1H), 4.75 (s, 2H), 4.66 (s, 2H);  $^{13}\text{C}$  NMR (100 MHz,  $\text{CDCl}_3$ )  $\delta$  163.1 (d,  $J = 245$  Hz), 147.3, 141.0 (d,  $J = 10$  Hz), 137.7, 135.5, 130.7 (d,  $J = 9$  Hz), 128.6, 128.0, 128.0, 128.0, 114.3 (d,  $J = 4$  Hz), 114.2 (d,  $J = 22$  Hz), 106.6 (d,  $J = 27$  Hz), 72.7, 63.3; IR (film)  $\nu_{\text{max}}$  3086, 3032, 2860, 2361, 1609, 1494, 1464, 1357, 1316, 1234, 1205, 1095, 1037, 972, 873, 780, 741, 697, 603, 534, 455  $\text{cm}^{-1}$ ; Anal. Calcd. For  $\text{C}_{16}\text{H}_{14}\text{FN}_3\text{O}$ : C, 67.83; H, 4.98. Found: C, 67.87; H, 4.97.

**2-Phenyl-2*H*-benzo[*d*][1,2,3]triazole** (CAS: 1916-72-9)

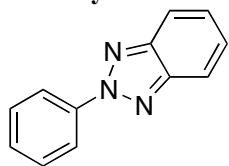

Following general procedure for *N*-arylation of 1,2,3-triazoles, a mixture of bromobenzene (106  $\mu$ L, 1.0 mmol), benzotriazole (143 mg, 1.2 mmol),  $K_3PO_4$  (424 mg, 2.0 mmol),  $Pd_2(dba)_3$  (6.9 mg, 0.0075 mmol), **L1** (8.6 mg, 0.018 mmol) in toluene (2.5 mL) was heated to 120  $^{\circ}C$  for 5 h. GC analysis of the crude reaction mixture indicated  $N^2:N^1$  ratio of 47:53. The crude product was purified via flash chromatography (Hexanes/EtOAc, 10:1 to 3:1) to provide the title compound as a white solid (84 mg, 43%) mp 103-105  $^{\circ}C$ , followed by 1-phenyl-2*H*-benzo[*d*][1,2,3]triazole.  $^1H$  NMR (400 MHz,  $CDCl_3$ )  $\delta$  8.39-8.33 (m, 2H), 7.94 (dd,  $J = 3.2, 6.4$  Hz, 2H), 7.58-7.52 (m, 2H), 7.48-7.38 (m, 3H);  $^{13}C$  NMR (100 MHz,  $CDCl_3$ )  $\delta$  145.2, 140.5, 129.6, 129.1, 127.3, 120.8, 118.6; IR (film)  $\nu_{max}$  3065, 2361, 1594, 1563, 1492, 1461, 1384, 1338, 1289, 1221, 964, 918, 748, 680  $cm^{-1}$ ; , 573, 517  $cm^{-1}$ ; Anal. Calcd. For  $C_{12}H_9N_3$ : C, 73.83; H, 4.65. Found: C, 74.09; H, 4.63.

**1-Phenyl-2*H*-benzo[*d*][1,2,3]triazole** (CAS: 883-39-6)

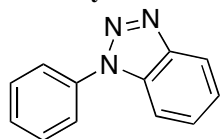

White solid (86 mg, 44%), mp 84-85  $^{\circ}C$ .  $^1H$  NMR (400 MHz,  $CDCl_3$ )  $\delta$  8.15-8.09 (m, 1H), 7.78-7.70 (m, 3H), 7.62-7.55 (m, 2H), 7.55-7.45 (m, 2H), 7.44-7.36 (m, 1H);  $^{13}C$  NMR (100 MHz,  $CDCl_3$ )  $\delta$  146.6, 137.1, 132.4, 130.0, 128.8, 128.4, 124.5, 122.9, 120.4, 110.5; IR (film)  $\nu_{max}$  3061, 2362, 1597, 1501, 1456, 1279, 1188, 1086, 1054, 752, 694, 573, 517  $cm^{-1}$ ; Anal. Calcd. For  $C_{12}H_9N_3$ : C, 73.83; H, 4.65. Found: C, 73.93; H, 4.60.

**Cartersian Coordinates for all Calculated Complexes:**

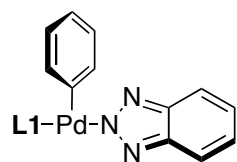

**Complex A**

|    |           |           |           |
|----|-----------|-----------|-----------|
| C  | 1.318618  | -2.490802 | 1.055146  |
| C  | 1.943781  | -2.800020 | -0.154631 |
| C  | 1.303893  | -2.400554 | -1.330148 |
| C  | 0.062024  | -1.762410 | -1.330888 |
| C  | -0.605052 | -1.508476 | -0.087473 |
| C  | 0.063306  | -1.878451 | 1.124768  |
| H  | 1.819615  | -2.756935 | 1.981622  |
| H  | 1.786703  | -2.586186 | -2.282086 |
| C  | -2.123784 | -1.404787 | -0.076447 |
| C  | -2.896669 | -0.219590 | 0.084831  |
| C  | -2.780813 | -2.659767 | -0.201999 |
| C  | -4.304524 | -0.332011 | 0.193516  |
| C  | -4.187918 | -2.732903 | -0.220452 |
| C  | -4.944182 | -1.578708 | 0.025231  |
| P  | -1.950796 | 1.474981  | 0.150679  |
| C  | -0.586930 | -1.737035 | 2.501040  |
| H  | -1.529470 | -1.201142 | 2.366811  |
| C  | 3.272733  | -3.548862 | -0.141858 |
| H  | 3.915425  | -3.027554 | 0.581110  |
| C  | 4.008937  | -3.554942 | -1.488066 |
| H  | 3.461085  | -4.129643 | -2.245936 |
| H  | 4.160528  | -2.539178 | -1.864039 |
| H  | 4.992568  | -4.023072 | -1.371159 |
| C  | 3.072736  | -4.993130 | 0.366853  |
| H  | 4.036471  | -5.510121 | 0.443549  |
| H  | 2.598053  | -5.015633 | 1.353692  |
| H  | 2.437336  | -5.562467 | -0.323153 |
| C  | -0.555819 | -1.398879 | -2.681515 |
| H  | -1.419806 | -0.762023 | -2.481685 |
| C  | 0.428305  | -0.602342 | -3.563486 |
| H  | -0.102343 | -0.163919 | -4.417383 |
| H  | 0.922319  | 0.195571  | -3.001940 |
| H  | 1.217388  | -1.246794 | -3.967406 |
| C  | -1.067511 | -2.625172 | -3.465121 |
| H  | -1.425464 | -2.314668 | -4.454423 |
| H  | -0.269737 | -3.362119 | -3.616048 |
| H  | -1.896574 | -3.119864 | -2.952879 |
| C  | 0.291263  | -0.931648 | 3.479085  |
| H  | -0.260088 | -0.736608 | 4.407506  |
| H  | 1.200445  | -1.480806 | 3.746935  |
| H  | 0.613775  | 0.020353  | 3.048003  |
| C  | -0.940488 | -3.107201 | 3.116797  |
| H  | -0.043984 | -3.720725 | 3.262737  |
| H  | -1.412730 | -2.968625 | 4.096983  |
| H  | -1.634563 | -3.670223 | 2.485859  |
| Pd | 0.478636  | 0.853711  | 0.011817  |
| C  | -2.538579 | 2.603582  | -1.394559 |
| C  | -2.346200 | 2.400921  | 1.907785  |
| C  | -4.044565 | 2.849828  | -1.565078 |
| H  | -4.599917 | 1.923744  | -1.728443 |
| H  | -4.492718 | 3.395020  | -0.731230 |
| H  | -4.177891 | 3.470558  | -2.461607 |
| C  | -1.825704 | 3.964159  | -1.286658 |
| H  | -0.750279 | 3.865512  | -1.143976 |
| H  | -1.987649 | 4.511072  | -2.225349 |
| H  | -2.228315 | 4.585067  | -0.483005 |
| C  | -2.048315 | 1.872941  | -2.653411 |
| H  | -2.228234 | 2.513362  | -3.527216 |
| H  | -0.981011 | 1.650106  | -2.614081 |
| H  | -2.596385 | 0.938812  | -2.811128 |
| C  | -3.394257 | 3.530284  | 1.886056  |
| H  | -4.411588 | 3.197218  | 1.676259  |
| H  | -3.414657 | 3.974797  | 2.890130  |
| H  | -3.141283 | 4.333755  | 1.192219  |
| C  | -2.758803 | 1.348782  | 2.947541  |
| H  | -2.903702 | 1.853136  | 3.912420  |
| H  | -3.690182 | 0.836274  | 2.698085  |
| H  | -1.979896 | 0.598052  | 3.088402  |
| C  | -1.013664 | 3.024452  | 2.351703  |
| H  | -0.227856 | 2.270742  | 2.439672  |
| H  | -0.663088 | 3.791745  | 1.657353  |
| H  | -1.151715 | 3.492953  | 3.335797  |
| C  | -2.015365 | -3.973817 | -0.284870 |
| H  | -2.414021 | -4.692244 | 0.440481  |
| H  | -2.109724 | -4.440927 | -1.272284 |
| H  | -0.952618 | -3.865861 | -0.084935 |
| C  | -5.209396 | 0.822942  | 0.544763  |
| H  | -6.019869 | 0.948077  | -0.181978 |
| H  | -5.689312 | 0.657017  | 1.518494  |
| H  | -4.675600 | 1.759563  | 0.601586  |
| C  | -6.454491 | -1.650079 | 0.147580  |
| H  | -6.824711 | -2.674645 | 0.144673  |
| H  | -6.800455 | -1.188929 | 1.079510  |
| H  | -6.957644 | -1.116021 | -0.670052 |
| C  | -4.880655 | -4.060249 | -0.470471 |
| H  | -5.762992 | -3.936321 | -1.104550 |
| H  | -4.228487 | -4.775613 | -0.971661 |
| H  | -5.216875 | -4.529888 | 0.464615  |
| C  | 1.311537  | 2.675010  | -0.332433 |
| C  | 1.829802  | 3.464235  | 0.698838  |
| C  | 1.517661  | 3.071576  | -1.659021 |
| C  | 2.477070  | 4.670930  | 0.408365  |
| H  | 1.762393  | 3.136252  | 1.729990  |
| C  | 2.167243  | 4.277638  | -1.946781 |
| H  | 1.183435  | 2.447537  | -2.481909 |
| C  | 2.639211  | 5.087857  | -0.913499 |
| H  | 2.870149  | 5.274299  | 1.223732  |
| H  | 2.311291  | 4.572438  | -2.983897 |
| H  | 3.147526  | 6.022405  | -1.136513 |

|   |          |           |           |
|---|----------|-----------|-----------|
| C | 4.363193 | 0.145706  | 1.113149  |
| C | 4.528662 | 0.055769  | -0.296998 |
| C | 5.466186 | 0.013832  | 1.984536  |
| C | 5.802732 | -0.159685 | -0.866340 |
| C | 6.706279 | -0.198126 | 1.411489  |
| H | 5.339056 | 0.083196  | 3.061373  |
| C | 6.873207 | -0.282732 | -0.000260 |
| H | 5.930806 | -0.217335 | -1.943714 |
| H | 7.581621 | -0.299920 | 2.048328  |
| H | 7.871301 | -0.444504 | -0.399873 |
| N | 2.481441 | 0.375622  | 0.156814  |
| N | 3.043486 | 0.360514  | 1.363085  |
| N | 3.305166 | 0.212154  | -0.872159 |

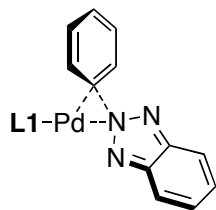

### Complex A-TS

|   |           |           |           |
|---|-----------|-----------|-----------|
| C | 1.243991  | -2.225501 | 1.619079  |
| C | 2.002163  | -2.712467 | 0.548525  |
| C | 1.476549  | -2.542825 | -0.731516 |
| C | 0.210330  | -1.985290 | -0.962270 |
| C | -0.587613 | -1.572422 | 0.144538  |
| C | -0.030919 | -1.678885 | 1.456771  |
| H | 1.650806  | -2.308380 | 2.623761  |
| H | 2.052584  | -2.874050 | -1.587947 |
| C | -2.099872 | -1.496128 | -0.015306 |
| C | -2.890577 | -0.317615 | -0.163029 |
| C | -2.734678 | -2.769576 | 0.013291  |
| C | -4.296743 | -0.451089 | -0.262272 |
| C | -4.127650 | -2.881717 | -0.167765 |
| C | -4.907754 | -1.722715 | -0.275396 |
| P | -1.974585 | 1.396944  | -0.163642 |
| C | -0.819148 | -1.313403 | 2.714589  |
| H | -1.764158 | -0.868400 | 2.393692  |
| C | 3.322176  | -3.427450 | 0.824702  |
| H | 3.914727  | -2.765198 | 1.471497  |
| C | 4.162105  | -3.717460 | -0.426144 |
| H | 3.658664  | -4.432127 | -1.089727 |
| H | 4.377683  | -2.809031 | -0.995985 |
| H | 5.120246  | -4.162065 | -0.134912 |
| C | 3.070531  | -4.736333 | 1.605066  |
| H | 4.020454  | -5.219920 | 1.863082  |
| H | 2.518860  | -4.558535 | 2.534117  |
| H | 2.486131  | -5.440319 | 0.999521  |
| C | -0.281716 | -1.921236 | -2.410245 |
| H | -1.176234 | -1.295051 | -2.424055 |
| C | 0.763910  | -1.280884 | -3.347850 |
| H | 0.302215  | -1.037676 | -4.312530 |
| H | 1.196484  | -0.370359 | -2.924154 |

|    |           |           |           |
|----|-----------|-----------|-----------|
| H  | 1.591081  | -1.971236 | -3.551895 |
| C  | -0.687955 | -3.300099 | -2.970971 |
| H  | -0.954591 | -3.209734 | -4.031284 |
| H  | 0.137418  | -4.018040 | -2.894923 |
| H  | -1.551278 | -3.715785 | -2.445850 |
| C  | -0.076801 | -0.277565 | 3.580277  |
| H  | -0.702936 | 0.035892  | 4.425096  |
| H  | 0.851577  | -0.688381 | 3.992980  |
| H  | 0.187466  | 0.607904  | 2.993258  |
| C  | -1.173005 | -2.553781 | 3.561376  |
| H  | -0.270517 | -3.062519 | 3.920337  |
| H  | -1.760444 | -2.258823 | 4.439530  |
| H  | -1.761629 | -3.278350 | 2.990907  |
| Pd | 0.492152  | 0.952103  | 0.042479  |
| C  | -2.229914 | 2.287193  | -1.937031 |
| C  | -2.716780 | 2.572708  | 1.302047  |
| C  | -3.658484 | 2.499914  | -2.459003 |
| H  | -4.184567 | 1.555473  | -2.619927 |
| H  | -4.267123 | 3.139678  | -1.815577 |
| H  | -3.588830 | 3.000425  | -3.434874 |
| C  | -1.515456 | 3.648531  | -1.857908 |
| H  | -0.491824 | 3.555681  | -1.491791 |
| H  | -1.475192 | 4.081194  | -2.866982 |
| H  | -2.039065 | 4.366567  | -1.221299 |
| C  | -1.490878 | 1.406995  | -2.954725 |
| H  | -1.459575 | 1.925910  | -3.922569 |
| H  | -0.462687 | 1.203464  | -2.643825 |
| H  | -2.006361 | 0.454163  | -3.108174 |
| C  | -3.786397 | 3.616952  | 0.925283  |
| H  | -4.752286 | 3.187802  | 0.656010  |
| H  | -3.961077 | 4.244573  | 1.809822  |
| H  | -3.468851 | 4.287024  | 0.123546  |
| C  | -3.265141 | 1.679048  | 2.424354  |
| H  | -3.573548 | 2.316098  | 3.264658  |
| H  | -4.133979 | 1.092069  | 2.115928  |
| H  | -2.503566 | 0.991871  | 2.798864  |
| C  | -1.495589 | 3.340898  | 1.838344  |
| H  | -0.724950 | 2.665134  | 2.211609  |
| H  | -1.030877 | 3.974816  | 1.078258  |
| H  | -1.815225 | 3.987721  | 2.667297  |
| C  | -1.961141 | -4.055891 | 0.276038  |
| H  | -2.421820 | -4.614298 | 1.099448  |
| H  | -1.965111 | -4.722158 | -0.594529 |
| H  | -0.920931 | -3.884401 | 0.539672  |
| C  | -5.236526 | 0.726499  | -0.329377 |
| H  | -5.902758 | 0.666748  | -1.198010 |
| H  | -5.884398 | 0.767519  | 0.556441  |
| H  | -4.706206 | 1.664369  | -0.391118 |
| C  | -6.418220 | -1.811238 | -0.382852 |
| H  | -6.790191 | -2.819377 | -0.201920 |
| H  | -6.910871 | -1.154307 | 0.342445  |
| H  | -6.775351 | -1.503277 | -1.375405 |
| C  | -4.790536 | -4.246559 | -0.226528 |
| H  | -5.536747 | -4.291669 | -1.025638 |
| H  | -4.076226 | -5.047561 | -0.414321 |
| H  | -5.308448 | -4.488780 | 0.711998  |

|   |          |           |           |
|---|----------|-----------|-----------|
| C | 1.788123 | 2.643108  | 0.262563  |
| C | 1.932364 | 3.086679  | 1.588391  |
| C | 1.906891 | 3.556443  | -0.797729 |
| C | 2.067597 | 4.450177  | 1.846553  |
| H | 1.954827 | 2.366650  | 2.398441  |
| C | 2.043208 | 4.917215  | -0.520907 |
| H | 1.911542 | 3.194502  | -1.819690 |
| C | 2.111453 | 5.375332  | 0.798540  |
| H | 2.154448 | 4.788335  | 2.876500  |
| H | 2.112107 | 5.621327  | -1.346920 |
| H | 2.232308 | 6.434802  | 1.006176  |
| C | 4.482719 | 0.146524  | 0.309519  |
| C | 4.302267 | 0.325604  | -1.096233 |
| C | 5.672469 | -0.420112 | 0.822961  |
| C | 5.303163 | -0.068328 | -2.013975 |
| C | 6.642064 | -0.789053 | -0.088642 |
| H | 5.813228 | -0.544900 | 1.892449  |
| C | 6.458521 | -0.616879 | -1.492337 |
| H | 5.164420 | 0.068445  | -3.082163 |
| H | 7.574566 | -1.220403 | 0.265763  |
| H | 7.256103 | -0.924348 | -2.163583 |
| N | 2.607276 | 1.061200  | -0.055686 |
| N | 3.389918 | 0.624838  | 0.943217  |
| N | 3.105902 | 0.919458  | -1.297204 |

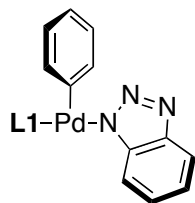

### Complex A'

|   |           |           |           |
|---|-----------|-----------|-----------|
| C | 1.265054  | -2.575961 | 1.035925  |
| C | 1.819080  | -2.976436 | -0.182645 |
| C | 1.156804  | -2.587519 | -1.349122 |
| C | -0.041848 | -1.869932 | -1.331498 |
| C | -0.636466 | -1.519645 | -0.076375 |
| C | 0.053216  | -1.883390 | 1.125435  |
| H | 1.780694  | -2.847934 | 1.953669  |
| H | 1.586529  | -2.847154 | -2.309063 |
| C | -2.142382 | -1.308561 | -0.015494 |
| C | -2.826552 | -0.066064 | 0.111786  |
| C | -2.887439 | -2.519762 | -0.064841 |
| C | -4.238458 | -0.073995 | 0.231987  |
| C | -4.295953 | -2.496155 | -0.048860 |
| C | -4.965855 | -1.279182 | 0.137198  |
| P | -1.766538 | 1.563054  | 0.153277  |
| C | -0.549101 | -1.671529 | 2.516044  |
| H | -1.494715 | -1.138449 | 2.389560  |
| C | 3.083981  | -3.830023 | -0.185149 |
| H | 3.773261  | -3.368361 | 0.535574  |
| C | 3.810121  | -3.894867 | -1.536303 |
| H | 3.207835  | -4.412850 | -2.293751 |

|    |           |           |           |
|----|-----------|-----------|-----------|
| H  | 4.061179  | -2.896558 | -1.907033 |
| H  | 4.742279  | -4.460533 | -1.424720 |
| C  | 2.763562  | -5.252998 | 0.323769  |
| H  | 3.679778  | -5.851173 | 0.393939  |
| H  | 2.293575  | -5.237249 | 1.313438  |
| H  | 2.078582  | -5.764579 | -0.364045 |
| C  | -0.698269 | -1.536337 | -2.672913 |
| H  | -1.501146 | -0.823768 | -2.472618 |
| C  | 0.293756  | -0.874335 | -3.652957 |
| H  | -0.254664 | -0.423547 | -4.489080 |
| H  | 0.906502  | -0.111724 | -3.166407 |
| H  | 0.986665  | -1.609739 | -4.077786 |
| C  | -1.343714 | -2.761504 | -3.353288 |
| H  | -1.722243 | -2.481019 | -4.343844 |
| H  | -0.614300 | -3.568186 | -3.492360 |
| H  | -2.184313 | -3.154540 | -2.776171 |
| C  | 0.360774  | -0.820295 | 3.420807  |
| H  | -0.115539 | -0.652400 | 4.394695  |
| H  | 1.322849  | -1.311718 | 3.601834  |
| H  | 0.569565  | 0.153240  | 2.965500  |
| C  | -0.879789 | -3.007503 | 3.214274  |
| H  | 0.023787  | -3.603447 | 3.385618  |
| H  | -1.343181 | -2.817635 | 4.190011  |
| H  | -1.573829 | -3.612838 | 2.624324  |
| Pd | 0.631149  | 0.815814  | -0.067002 |
| C  | -2.248597 | 2.703589  | -1.425434 |
| C  | -2.130993 | 2.535882  | 1.891585  |
| C  | -3.734505 | 3.015817  | -1.654445 |
| H  | -4.330300 | 2.114079  | -1.814791 |
| H  | -4.183102 | 3.604088  | -0.850038 |
| H  | -3.807080 | 3.618605  | -2.569987 |
| C  | -1.481192 | 4.033293  | -1.308352 |
| H  | -0.416923 | 3.890465  | -1.127565 |
| H  | -1.585865 | 4.572087  | -2.259608 |
| H  | -1.885347 | 4.683736  | -0.528948 |
| C  | -1.745069 | 1.931030  | -2.653636 |
| H  | -1.846735 | 2.570027  | -3.540922 |
| H  | -0.695704 | 1.645583  | -2.561808 |
| H  | -2.339730 | 1.029226  | -2.827105 |
| C  | -3.122550 | 3.715169  | 1.850162  |
| H  | -4.160149 | 3.422767  | 1.686173  |
| H  | -3.089606 | 4.203737  | 2.833131  |
| H  | -2.853330 | 4.472588  | 1.112725  |
| C  | -2.601604 | 1.520420  | 2.943293  |
| H  | -2.729331 | 2.044101  | 3.900378  |
| H  | -3.555383 | 1.053464  | 2.689671  |
| H  | -1.865700 | 0.730281  | 3.100692  |
| C  | -0.772062 | 3.102997  | 2.330431  |
| H  | -0.021318 | 2.315063  | 2.424088  |
| H  | -0.388986 | 3.847283  | 1.628381  |
| H  | -0.886446 | 3.586464  | 3.310286  |
| C  | -2.214995 | -3.885910 | -0.096418 |
| H  | -2.627068 | -4.529456 | 0.689441  |
| H  | -2.385398 | -4.404480 | -1.046847 |
| H  | -1.139340 | -3.839391 | 0.050239  |
| C  | -5.059263 | 1.159690  | 0.512149  |

H -5.859616 1.294977 -0.223997  
H -5.548859 1.089717 1.492660  
H -4.460726 2.057555 0.509645  
C -6.476283 -1.237453 0.271865  
H -6.783015 -0.698491 1.175533  
H -6.948138 -0.720182 -0.574722  
H -6.916822 -2.232065 0.332241  
C -5.087286 -3.782512 -0.202591  
H -5.464843 -4.147478 0.762789  
H -5.954209 -3.640187 -0.854280  
H -4.492025 -4.584701 -0.637974  
C 1.556734 2.585779 -0.427490  
C 2.048092 3.409661 0.589764  
C 1.830346 2.918938 -1.760393  
C 2.736510 4.588639 0.276258  
H 1.918183 3.143356 1.632492  
C 2.516200 4.097903 -2.070183  
H 1.531235 2.257017 -2.566522  
C 2.962759 4.943673 -1.053232  
H 3.106248 5.219452 1.081674  
H 2.714072 4.341583 -3.111499  
H 3.501530 5.856292 -1.294333  
C 3.625342 0.129342 0.629010  
C 4.748979 -0.246516 -0.143852  
C 3.738316 0.359256 2.012519  
C 6.012139 -0.418962 0.450309  
C 4.991076 0.192396 2.583899  
H 2.883116 0.659089 2.609592  
C 6.117252 -0.196107 1.814068  
H 6.868889 -0.712662 -0.149500  
H 5.117532 0.365489 3.649963  
H 7.077704 -0.315775 2.308718  
N 2.583877 0.175573 -0.254223  
N 3.059516 -0.110898 -1.486358  
N 4.342239 -0.381036 -1.449532

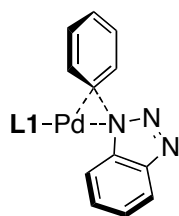

**Complex A'-TS**

C -1.130441 2.707670 0.836313  
C -1.620636 3.081295 -0.417710  
C -0.906087 2.645338 -1.534526  
C 0.283461 1.913246 -1.432757  
C 0.806420 1.597342 -0.145750  
C 0.066004 2.001001 1.004143  
H -1.682038 3.016971 1.721341  
H -1.275734 2.890430 -2.523698  
C 2.278925 1.241422 -0.000428  
C 2.834979 -0.064357 0.164861

C 3.140341 2.373822 -0.015156  
C 4.234907 -0.187644 0.337857  
C 4.537685 2.217861 0.083178  
C 5.078535 0.941997 0.288103  
P 1.625683 -1.587738 0.202420  
C 0.574029 1.792965 2.431924  
H 1.496645 1.209000 2.375214  
C -2.851618 3.979725 -0.504792  
H -3.583039 3.585705 0.214852  
C -3.531258 4.004195 -1.880753  
H -2.879349 4.443588 -2.646383  
H -3.825682 2.999563 -2.196617  
H -4.435485 4.622513 -1.835091  
C -2.489904 5.413496 -0.057566  
H -3.381349 6.052397 -0.048317  
H -2.052489 5.427460 0.946842  
H -1.760982 5.860400 -0.745179  
C 0.998392 1.535716 -2.732366  
H 1.779702 0.813803 -2.481793  
C 0.043179 0.868707 -3.743403  
H 0.616044 0.420515 -4.564116  
H -0.563102 0.090930 -3.272042  
H -0.646325 1.596063 -4.187062  
C 1.690523 2.738482 -3.407335  
H 2.127100 2.433255 -4.366405  
H 0.974449 3.544287 -3.607960  
H 2.495557 3.145130 -2.790406  
C -0.435090 1.009548 3.292621  
H -0.019447 0.809635 4.288217  
H -1.367673 1.567967 3.428948  
H -0.692782 0.054956 2.822719  
C 0.928143 3.125612 3.124580  
H 0.045417 3.767228 3.228219  
H 1.321812 2.936579 4.130906  
H 1.684511 3.685443 2.567013  
Pd -0.731001 -0.815981 -0.078146  
C 2.016742 -2.837686 -1.315479  
C 1.832998 -2.564043 1.960138  
C 3.444904 -3.374698 -1.490924  
H 4.166212 -2.578384 -1.691703  
H 3.796343 -3.966570 -0.641715  
H 3.446056 -4.039731 -2.365724  
C 1.049512 -4.026385 -1.164530  
H 0.017381 -3.704673 -1.022686  
H 1.086772 -4.624508 -2.084870  
H 1.322984 -4.690237 -0.339773  
C 1.649770 -2.060114 -2.586909  
H 1.744829 -2.726753 -3.454939  
H 0.620999 -1.696541 -2.550412  
H 2.319989 -1.209902 -2.747309  
C 2.749711 -3.802563 1.999451  
H 3.811428 -3.566942 1.917226  
H 2.612782 -4.287619 2.975583  
H 2.498782 -4.545603 1.240204  
C 2.306830 -1.564923 3.025284  
H 2.332672 -2.070605 4.000401

H 3.309055 -1.178845 2.823244  
H 1.627547 -0.715767 3.114816  
C 0.411571 -3.038084 2.319247  
H -0.289830 -2.200640 2.361997  
H 0.020006 -3.757375 1.594683  
H 0.433798 -3.524205 3.304743  
C 2.603848 3.797351 -0.099135  
H 2.994950 4.401569 0.728017  
H 2.915126 4.296186 -1.024336  
H 1.519118 3.850128 -0.059070  
C 4.918621 -1.501096 0.620644  
H 5.729979 -1.699797 -0.089115  
H 5.372667 -1.503493 1.620711  
H 4.232364 -2.332198 0.570963  
C 6.570790 0.752790 0.484446  
H 6.784993 0.165654 1.384607  
H 7.027083 0.211567 -0.355916  
H 7.101050 1.698891 0.588270  
C 5.458671 3.421660 -0.008130  
H 5.857628 3.703566 0.976168  
H 6.317363 3.217239 -0.655334  
H 4.957061 4.299493 -0.413479  
C -2.214605 -2.244871 -0.631474  
C -2.550919 -3.258749 0.285054  
C -2.258175 -2.527282 -2.012785  
C -2.830100 -4.547716 -0.174433  
H -2.576490 -3.056827 1.348503  
C -2.535855 -3.820165 -2.450092  
H -2.097863 -1.730846 -2.729293  
C -2.817109 -4.843965 -1.538913  
H -3.062839 -5.324508 0.550541  
H -2.544431 -4.023280 -3.518481  
H -3.044600 -5.846929 -1.888093  
C -3.672784 -0.297845 0.808216  
C -4.661486 0.546853 0.264288  
C -3.689756 -0.652910 2.165771  
C -5.701643 1.057983 1.055953  
C -4.726348 -0.146820 2.939528  
H -2.918597 -1.275341 2.604998  
C -5.722361 0.698630 2.395070  
H -6.455150 1.708753 0.622850  
H -4.771032 -0.402010 3.994988  
H -6.510733 1.071535 3.042896  
N -2.832565 -0.583843 -0.252183  
N -3.322070 0.059351 -1.368413  
N -4.391125 0.726808 -1.076958

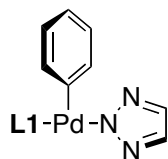

**Complex B**

C -1.401808 2.645057 1.230404

C -2.056595 3.045635 0.064673  
C -1.521081 2.620704 -1.153035  
C -0.353311 1.859793 -1.235954  
C 0.348345 1.506018 -0.037335  
C -0.212700 1.909293 1.216995  
H -1.823840 2.933848 2.189024  
H -2.031024 2.880477 -2.073071  
C 1.844335 1.236344 -0.119344  
C 2.489102 -0.030896 -0.034892  
C 2.627730 2.415055 -0.263001  
C 3.904789 -0.078227 -0.037712  
C 4.029518 2.333763 -0.380832  
C 4.666314 1.094129 -0.230214  
P 1.368398 -1.609418 0.106215  
C 0.491931 1.670912 2.552161  
H 1.374043 1.057615 2.353999  
C -3.303009 3.918516 0.169438  
H -3.945034 3.448717 0.927559  
C -4.119636 4.013405 -1.126153  
H -3.570282 4.546630 -1.912523  
H -4.385806 3.020745 -1.501074  
H -5.045535 4.570259 -0.942691  
C -2.933823 5.329339 0.676635  
H -3.836320 5.935629 0.820022  
H -2.397338 5.291525 1.630852  
H -2.291863 5.845930 -0.047918  
C 0.149539 1.469735 -2.626197  
H 0.956677 0.747308 -2.488298  
C -0.958138 0.794370 -3.462091  
H -0.523665 0.324038 -4.352606  
H -1.498130 0.037941 -2.885747  
H -1.699276 1.523816 -3.807767  
C 0.734409 2.658179 -3.416837  
H 1.009618 2.335726 -4.428555  
H 0.003221 3.469475 -3.513719  
H 1.631879 3.063302 -2.942368  
C -0.402629 0.917976 3.556076  
H 0.171878 0.659214 4.454451  
H -1.253488 1.530163 3.874082  
H -0.816464 0.002916 3.123153  
C 0.997290 2.986294 3.180946  
H 0.166881 3.668936 3.395524  
H 1.510973 2.778521 4.127527  
H 1.699879 3.507788 2.524239  
Pd -0.987264 -0.741831 0.115619  
C 1.691825 -2.787039 -1.486796  
C 1.806372 -2.582888 1.826365  
C 3.140777 -3.180465 -1.807272  
H 3.769922 -2.314715 -2.026220  
H 3.610392 -3.777318 -1.022002  
H 3.120607 -3.802559 -2.712611  
C 0.864649 -4.073275 -1.307459  
H -0.164734 -3.876050 -1.012389  
H 0.836609 -4.599819 -2.271044  
H 1.312480 -4.759382 -0.584725  
C 1.152951 -1.995382 -2.687322



|   |           |           |           |
|---|-----------|-----------|-----------|
| H | 1.184815  | -2.635684 | -3.579040 |
| H | 0.121184  | -1.673185 | -2.539083 |
| H | 1.769080  | -1.114275 | -2.891420 |
| C | 2.703304  | -3.830653 | 1.712838  |
| H | 3.726492  | -3.623344 | 1.396491  |
| H | 2.771396  | -4.276152 | 2.714366  |
| H | 2.284398  | -4.594382 | 1.056405  |
| C | 2.438790  | -1.598218 | 2.821175  |
| H | 2.606024  | -2.125162 | 3.770238  |
| H | 3.400381  | -1.203855 | 2.487026  |
| H | 1.776879  | -0.756852 | 3.030028  |
| C | 0.453379  | -3.043686 | 2.391264  |
| H | -0.223945 | -2.201244 | 2.550035  |
| H | -0.048872 | -3.754676 | 1.731513  |
| H | 0.621070  | -3.536683 | 3.358771  |
| C | 2.007498  | 3.806145  | -0.260790 |
| H | 2.519644  | 4.449616  | 0.463841  |
| H | 2.100460  | 4.297305  | -1.236491 |
| H | 0.951331  | 3.804707  | -0.005054 |
| C | 4.699203  | -1.336849 | 0.209735  |
| H | 5.414100  | -1.538082 | -0.596042 |
| H | 5.289154  | -1.248429 | 1.131647  |
| H | 4.068304  | -2.207187 | 0.310107  |
| C | 6.179575  | 0.990901  | -0.236349 |
| H | 6.665338  | 1.965240  | -0.275402 |
| H | 6.549114  | 0.486441  | 0.664051  |
| H | 6.545161  | 0.407357  | -1.092087 |
| C | 4.852131  | 3.583731  | -0.636997 |
| H | 5.641184  | 3.397088  | -1.371463 |
| H | 4.248190  | 4.404507  | -1.022946 |
| H | 5.341760  | 3.944771  | 0.278172  |
| C | -2.029157 | -2.460559 | -0.172963 |
| C | -2.532983 | -3.211477 | 0.893823  |
| C | -2.380855 | -2.820810 | -1.479779 |
| C | -3.312238 | -4.349341 | 0.653029  |
| H | -2.348810 | -2.905501 | 1.917540  |
| C | -3.161522 | -3.957606 | -1.717784 |
| H | -2.060001 | -2.220444 | -2.325444 |
| C | -3.620907 | -4.733383 | -0.652609 |
| H | -3.690938 | -4.924173 | 1.495502  |
| H | -3.417482 | -4.224984 | -2.740756 |
| H | -4.230435 | -5.614367 | -0.837101 |
| N | -3.475418 | 0.010538  | 1.527200  |
| N | -2.909080 | -0.040580 | 0.319753  |
| N | -3.754817 | 0.198313  | -0.682342 |
| C | -4.759848 | 0.334194  | 1.294488  |
| C | -4.934740 | 0.449836  | -0.087212 |
| H | -5.461971 | 0.458148  | 2.107675  |
| H | -5.814543 | 0.688960  | -0.668854 |

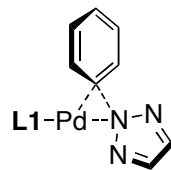

### Complex B-TS

|    |           |           |           |
|----|-----------|-----------|-----------|
| C  | -0.976418 | 2.671247  | 1.475996  |
| C  | -1.512195 | 3.326635  | 0.362795  |
| C  | -0.978868 | 3.004393  | -0.883702 |
| C  | 0.093052  | 2.113304  | -1.040862 |
| C  | 0.672493  | 1.503600  | 0.109204  |
| C  | 0.099737  | 1.785318  | 1.386923  |
| H  | -1.399084 | 2.881855  | 2.455327  |
| H  | -1.388535 | 3.472060  | -1.771933 |
| C  | 2.093891  | 0.965395  | 0.035365  |
| C  | 2.487911  | -0.402016 | -0.078949 |
| C  | 3.088169  | 1.980797  | 0.114760  |
| C  | 3.870134  | -0.708748 | -0.100422 |
| C  | 4.456612  | 1.654978  | 0.028422  |
| C  | 4.843966  | 0.311307  | -0.058184 |
| P  | 1.092020  | -1.757804 | -0.128818 |
| C  | 0.675879  | 1.230550  | 2.690166  |
| H  | 1.470079  | 0.526402  | 2.430087  |
| C  | -2.607642 | 4.369721  | 0.564413  |
| H  | -3.359020 | 3.913968  | 1.224989  |
| C  | -3.323251 | 4.797017  | -0.724290 |
| H  | -2.647369 | 5.334593  | -1.400942 |
| H  | -3.732445 | 3.936408  | -1.262684 |
| H  | -4.151190 | 5.474822  | -0.486559 |
| C  | -2.044565 | 5.609951  | 1.292107  |
| H  | -2.843103 | 6.332168  | 1.501524  |
| H  | -1.572601 | 5.343155  | 2.243627  |
| H  | -1.289408 | 6.110616  | 0.673513  |
| C  | 0.632885  | 1.901119  | -2.457488 |
| H  | 1.313357  | 1.047507  | -2.425248 |
| C  | -0.491417 | 1.577523  | -3.464391 |
| H  | -0.058751 | 1.206401  | -4.401331 |
| H  | -1.189018 | 0.829441  | -3.078511 |
| H  | -1.074551 | 2.472651  | -3.712164 |
| C  | 1.443796  | 3.106561  | -2.977526 |
| H  | 1.740841  | 2.937434  | -4.019976 |
| H  | 0.848318  | 4.026921  | -2.945554 |
| H  | 2.353917  | 3.269573  | -2.395384 |
| C  | -0.382792 | 0.467985  | 3.510073  |
| H  | 0.079390  | -0.009459 | 4.383153  |
| H  | -1.166982 | 1.138986  | 3.879399  |
| H  | -0.867077 | -0.304623 | 2.904462  |
| C  | 1.319854  | 2.332898  | 3.556706  |
| H  | 0.583300  | 3.091268  | 3.846991  |
| H  | 1.733287  | 1.900405  | 4.476136  |
| H  | 2.132678  | 2.840504  | 3.029003  |
| Pd | -1.143499 | -0.615938 | -0.069391 |
| C  | 1.143559  | -2.712733 | -1.889662 |

|   |           |           |           |
|---|-----------|-----------|-----------|
| C | 1.375924  | -3.079629 | 1.372039  |
| C | 2.462560  | -3.351557 | -2.346649 |
| H | 3.258595  | -2.613140 | -2.470900 |
| H | 2.814587  | -4.144900 | -1.682700 |
| H | 2.290521  | -3.810512 | -3.330265 |
| C | 0.049063  | -3.793612 | -1.841673 |
| H | -0.909334 | -3.391586 | -1.509747 |
| H | -0.086262 | -4.198630 | -2.854105 |
| H | 0.307199  | -4.634400 | -1.192258 |
| C | 0.744904  | -1.664856 | -2.937890 |
| H | 0.619642  | -2.159467 | -3.910912 |
| H | -0.198683 | -1.176379 | -2.679827 |
| H | 1.517462  | -0.898822 | -3.054207 |
| C | 2.097818  | -4.402656 | 1.047794  |
| H | 3.164396  | -4.290407 | 0.849027  |
| H | 2.011820  | -5.051217 | 1.930193  |
| H | 1.644596  | -4.943069 | 0.214708  |
| C | 2.112807  | -2.377784 | 2.522739  |
| H | 2.158429  | -3.062163 | 3.381038  |
| H | 3.137974  | -2.099433 | 2.265119  |
| H | 1.586758  | -1.478519 | 2.850218  |
| C | -0.045691 | -3.436085 | 1.842774  |
| H | -0.597879 | -2.552040 | 2.163387  |
| H | -0.636815 | -3.921309 | 1.061228  |
| H | 0.021402  | -4.128334 | 2.693675  |
| C | 2.732396  | 3.446596  | 0.332659  |
| H | 3.257646  | 3.840436  | 1.210790  |
| H | 3.033755  | 4.069572  | -0.517357 |
| H | 1.669584  | 3.612654  | 0.487239  |
| C | 4.404776  | -2.118231 | -0.138345 |
| H | 5.091609  | -2.269925 | -0.979370 |
| H | 4.973408  | -2.350898 | 0.771826  |
| H | 3.615995  | -2.849033 | -0.228128 |
| C | 6.310792  | -0.074258 | -0.083612 |
| H | 6.970473  | 0.777874  | 0.077385  |
| H | 6.545135  | -0.811707 | 0.692974  |
| H | 6.594662  | -0.531041 | -1.041470 |
| C | 5.516535  | 2.742317  | 0.048177  |
| H | 6.253132  | 2.592923  | -0.748154 |
| H | 5.098113  | 3.738228  | -0.089372 |
| H | 6.068621  | 2.752327  | 0.997904  |
| C | -2.888615 | -1.823731 | 0.136748  |
| C | -3.234501 | -2.093235 | 1.472457  |
| C | -3.236764 | -2.737901 | -0.871570 |
| C | -3.802555 | -3.323606 | 1.801963  |
| H | -3.066599 | -1.342206 | 2.236255  |
| C | -3.805908 | -3.963388 | -0.522938 |
| H | -3.074611 | -2.478926 | -1.911882 |
| C | -4.080587 | -4.272316 | 0.812909  |
| H | -4.041103 | -3.534307 | 2.842032  |
| H | -4.048885 | -4.675621 | -1.308382 |
| H | -4.535196 | -5.223491 | 1.075153  |
| N | -3.871805 | 0.655129  | 0.538561  |
| N | -3.173200 | -0.079982 | -0.344335 |
| N | -3.539770 | 0.113658  | -1.626090 |
| C | -4.706914 | 1.375086  | -0.214117 |

|   |           |          |           |
|---|-----------|----------|-----------|
| C | -4.497157 | 1.041722 | -1.562987 |
| H | -5.408106 | 2.064644 | 0.234878  |
| H | -4.986054 | 1.400310 | -2.458203 |

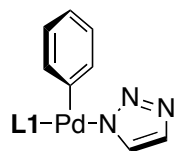

### Complex B'

|   |           |           |           |
|---|-----------|-----------|-----------|
| C | 1.492782  | -2.528232 | 1.365896  |
| C | 2.154593  | -2.987381 | 0.224180  |
| C | 1.617742  | -2.633855 | -1.015301 |
| C | 0.431745  | -1.905986 | -1.142229 |
| C | -0.278319 | -1.497940 | 0.033845  |
| C | 0.294589  | -1.810763 | 1.309880  |
| H | 1.913524  | -2.767675 | 2.339692  |
| H | 2.137435  | -2.931419 | -1.917902 |
| C | -1.783939 | -1.295728 | -0.071931 |
| C | -2.481011 | -0.054245 | -0.094669 |
| C | -2.515222 | -2.514124 | -0.150490 |
| C | -3.895161 | -0.064969 | -0.178228 |
| C | -3.914073 | -2.500395 | -0.319760 |
| C | -4.601859 | -1.278944 | -0.309024 |
| P | -1.435635 | 1.573474  | 0.056920  |
| C | -0.415262 | -1.497844 | 2.626592  |
| H | -1.310355 | -0.920420 | 2.385016  |
| C | 3.396477  | -3.859464 | 0.379009  |
| H | 4.004616  | -3.394211 | 1.167123  |
| C | 4.271783  | -3.953021 | -0.878395 |
| H | 3.753200  | -4.474206 | -1.693326 |
| H | 4.575355  | -2.961652 | -1.227798 |
| H | 5.177114  | -4.528862 | -0.653519 |
| C | 2.995890  | -5.268459 | 0.869247  |
| H | 3.888113  | -5.879640 | 1.050310  |
| H | 2.417910  | -5.227894 | 1.799375  |
| H | 2.383511  | -5.780875 | 0.116747  |
| C | -0.084933 | -1.622823 | -2.554148 |
| H | -0.903979 | -0.905326 | -2.464318 |
| C | 1.007287  | -0.997471 | -3.448767 |
| H | 0.550876  | -0.567744 | -4.348854 |
| H | 1.578671  | -0.226300 | -2.926244 |
| H | 1.729548  | -1.752574 | -3.779661 |
| C | -0.657780 | -2.875958 | -3.248542 |
| H | -0.931805 | -2.636716 | -4.283298 |
| H | 0.082315  | -3.684293 | -3.278435 |
| H | -1.553134 | -3.250006 | -2.745335 |
| C | 0.460135  | -0.650006 | 3.569726  |
| H | -0.110037 | -0.353432 | 4.458785  |
| H | 1.337239  | -1.209734 | 3.914438  |
| H | 0.820032  | 0.255212  | 3.069175  |
| C | -0.889435 | -2.773906 | 3.352368  |
| H | -0.044398 | -3.419076 | 3.619376  |
| H | -1.412508 | -2.509247 | 4.279426  |

|    |           |           |           |
|----|-----------|-----------|-----------|
| H  | -1.576161 | -3.359284 | 2.734228  |
| Pd | 0.960012  | 0.804183  | 0.135880  |
| C  | -1.666671 | 2.695922  | -1.594555 |
| C  | -2.052468 | 2.572101  | 1.707452  |
| C  | -3.095483 | 3.011597  | -2.058780 |
| H  | -3.664637 | 2.110997  | -2.301095 |
| H  | -3.661298 | 3.612959  | -1.342864 |
| H  | -3.018509 | 3.603299  | -2.981223 |
| C  | -0.916850 | 4.023199  | -1.379550 |
| H  | 0.081677  | 3.883293  | -0.967956 |
| H  | -0.804388 | 4.514803  | -2.355144 |
| H  | -1.468928 | 4.714544  | -0.738393 |
| C  | -0.984507 | 1.896715  | -2.715378 |
| H  | -0.961383 | 2.510493  | -3.625682 |
| H  | 0.042454  | 1.624341  | -2.464778 |
| H  | -1.540061 | 0.983273  | -2.947624 |
| C  | -2.991386 | 3.772866  | 1.481279  |
| H  | -3.981616 | 3.504383  | 1.111214  |
| H  | -3.143424 | 4.260209  | 2.453844  |
| H  | -2.563143 | 4.523235  | 0.815809  |
| C  | -2.720020 | 1.591236  | 2.683204  |
| H  | -2.977975 | 2.138570  | 3.599857  |
| H  | -3.637948 | 1.149522  | 2.291167  |
| H  | -2.047206 | 0.780401  | 2.967959  |
| C  | -0.772088 | 3.113800  | 2.359604  |
| H  | -0.074994 | 2.308776  | 2.602367  |
| H  | -0.250165 | 3.825100  | 1.715985  |
| H  | -1.036896 | 3.629471  | 3.292825  |
| C  | -1.839734 | -3.874172 | -0.029855 |
| H  | -2.337007 | -4.478567 | 0.737574  |
| H  | -1.898979 | -4.442496 | -0.965147 |
| H  | -0.788263 | -3.811759 | 0.236600  |
| C  | -4.746982 | 1.177427  | -0.097546 |
| H  | -5.401847 | 1.280067  | -0.970529 |
| H  | -5.405165 | 1.146530  | 0.780655  |
| H  | -4.154806 | 2.077322  | -0.029755 |
| C  | -6.114927 | -1.239018 | -0.406787 |
| H  | -6.555811 | -0.675797 | 0.423995  |
| H  | -6.450002 | -0.745886 | -1.329275 |
| H  | -6.560895 | -2.232599 | -0.388797 |
| C  | -4.683268 | -3.798066 | -0.493449 |
| H  | -5.247059 | -4.060702 | 0.412240  |
| H  | -5.406727 | -3.723798 | -1.311396 |
| H  | -4.031842 | -4.640562 | -0.721658 |
| C  | 1.942479  | 2.576043  | -0.026004 |
| C  | 2.290100  | 3.348511  | 1.087207  |
| C  | 2.417894  | 2.957787  | -1.287161 |
| C  | 3.035849  | 4.524151  | 0.932053  |
| H  | 1.997671  | 3.044334  | 2.086476  |
| C  | 3.159264  | 4.133667  | -1.440281 |
| H  | 2.235270  | 2.333524  | -2.155675 |
| C  | 3.462881  | 4.927829  | -0.332789 |
| H  | 3.289433  | 5.114860  | 1.809791  |
| H  | 3.514426  | 4.415117  | -2.429025 |
| H  | 4.045047  | 5.837913  | -0.452056 |
| N  | 3.526481  | -0.139182 | -1.015587 |

|   |          |           |           |
|---|----------|-----------|-----------|
| N | 2.909394 | 0.145558  | 0.143770  |
| C | 4.988028 | -0.347831 | 0.575426  |
| H | 5.951143 | -0.551435 | 1.023080  |
| N | 4.786751 | -0.452050 | -0.765190 |
| C | 3.797918 | 0.041503  | 1.161634  |
| H | 3.526022 | 0.244305  | 2.186490  |

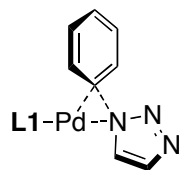

### Complex B'-TS

|   |           |           |           |
|---|-----------|-----------|-----------|
| C | 1.041857  | 2.827742  | -1.147814 |
| C | 1.657428  | 3.255084  | 0.030706  |
| C | 1.138170  | 2.769077  | 1.231395  |
| C | 0.022356  | 1.926033  | 1.287384  |
| C | -0.628311 | 1.540100  | 0.078674  |
| C | -0.089749 | 2.002918  | -1.158619 |
| H | 1.439889  | 3.181497  | -2.096283 |
| H | 1.611407  | 3.059641  | 2.162507  |
| C | -2.063254 | 1.035702  | 0.128616  |
| C | -2.496453 | -0.322920 | 0.043212  |
| C | -3.029371 | 2.072573  | 0.254980  |
| C | -3.886121 | -0.595287 | 0.057175  |
| C | -4.402539 | 1.769626  | 0.348398  |
| C | -4.829190 | 0.441425  | 0.218223  |
| P | -1.145271 | -1.712217 | -0.133536 |
| C | -0.759617 | 1.733540  | -2.508295 |
| H | -1.599043 | 1.054078  | -2.336690 |
| C | 2.804271  | 4.258571  | -0.038969 |
| H | 3.446747  | 3.944482  | -0.872051 |
| C | 3.685630  | 4.307044  | 1.216008  |
| H | 3.134270  | 4.685922  | 2.086103  |
| H | 4.089789  | 3.319121  | 1.451137  |
| H | 4.529360  | 4.986365  | 1.048194  |
| C | 2.256910  | 5.664067  | -0.371152 |
| H | 3.078735  | 6.381117  | -0.487113 |
| H | 1.673097  | 5.663354  | -1.298528 |
| H | 1.604312  | 6.025989  | 0.433336  |
| C | -0.481223 | 1.505938  | 2.670759  |
| H | -1.207400 | 0.701850  | 2.528691  |
| C | 0.653836  | 0.966784  | 3.565099  |
| H | 0.235067  | 0.495703  | 4.462497  |
| H | 1.268225  | 0.229889  | 3.041313  |
| H | 1.319073  | 1.770539  | 3.900265  |
| C | -1.206464 | 2.647140  | 3.414553  |
| H | -1.486909 | 2.321339  | 4.423906  |
| H | -0.559401 | 3.526773  | 3.514907  |
| H | -2.119292 | 2.953683  | 2.898700  |
| C | 0.200539  | 1.060040  | -3.507601 |
| H | -0.328752 | 0.797064  | -4.431918 |
| H | 1.028292  | 1.725110  | -3.779039 |

|    |           |           |           |   |           |           |           |
|----|-----------|-----------|-----------|---|-----------|-----------|-----------|
| H  | 0.636052  | 0.150176  | -3.082407 | H | -1.580207 | 3.705864  | 0.069836  |
| C  | -1.343154 | 3.017356  | -3.134839 | C | -4.460813 | -1.977428 | -0.129256 |
| H  | -0.555855 | 3.750833  | -3.345014 | H | -5.146631 | -2.245956 | 0.682732  |
| H  | -1.841572 | 2.783167  | -4.083630 | H | -5.040938 | -2.042050 | -1.059572 |
| H  | -2.076624 | 3.493555  | -2.478305 | H | -3.693492 | -2.735472 | -0.170074 |
| Pd | 1.122739  | -0.671530 | -0.232931 | C | -6.306901 | 0.098315  | 0.226815  |
| C  | -1.210829 | -2.949535 | 1.438504  | H | -6.575494 | -0.543248 | -0.619643 |
| C  | -1.472965 | -2.746766 | -1.840947 | H | -6.593302 | -0.448802 | 1.135895  |
| C  | -2.529687 | -3.664151 | 1.767948  | H | -6.940029 | 0.983244  | 0.167530  |
| H  | -3.320458 | -2.963338 | 2.046460  | C | -5.424656 | 2.871108  | 0.566954  |
| H  | -2.891804 | -4.306588 | 0.961673  | H | -5.981679 | 3.097879  | -0.352731 |
| H  | -2.351561 | -4.311230 | 2.637978  | H | -6.160415 | 2.584581  | 1.324932  |
| C  | -0.109843 | -4.001798 | 1.211144  | H | -4.968634 | 3.801813  | 0.902468  |
| H  | 0.858054  | -3.543112 | 1.006958  | C | 2.800727  | -1.904144 | 0.158033  |
| H  | -0.009085 | -4.602946 | 2.124643  | C | 3.089144  | -2.980656 | -0.700303 |
| H  | -0.346046 | -4.691787 | 0.396261  | C | 3.123820  | -2.004598 | 1.524465  |
| C  | -0.826847 | -2.095862 | 2.654361  | C | 3.595757  | -4.170250 | -0.175680 |
| H  | -0.731792 | -2.748077 | 3.533305  | H | 2.905607  | -2.898696 | -1.766345 |
| H  | 0.129647  | -1.591619 | 2.504746  | C | 3.623628  | -3.203522 | 2.031599  |
| H  | -1.592070 | -1.346468 | 2.879296  | H | 3.008521  | -1.140011 | 2.167497  |
| C  | -2.221084 | -4.089893 | -1.735849 | C | 3.856472  | -4.297099 | 1.191838  |
| H  | -3.281966 | -3.987414 | -1.503058 | H | 3.790976  | -5.002834 | -0.847861 |
| H  | -2.162912 | -4.582456 | -2.716076 | H | 3.848173  | -3.273932 | 3.093331  |
| H  | -1.771150 | -4.772188 | -1.011514 | H | 4.259756  | -5.222982 | 1.591560  |
| C  | -2.209414 | -1.835351 | -2.832812 | N | 3.805501  | 0.612183  | 0.339866  |
| H  | -2.306059 | -2.359701 | -3.793455 | N | 3.186938  | -0.248606 | -0.514983 |
| H  | -3.213505 | -1.568737 | -2.494827 | C | 4.603531  | 0.951689  | -1.654356 |
| H  | -1.657144 | -0.911872 | -3.016976 | H | 5.230932  | 1.412506  | -2.404049 |
| C  | -0.070454 | -3.053217 | -2.399247 | N | 4.652352  | 1.336900  | -0.345160 |
| H  | 0.516559  | -2.139964 | -2.530505 | C | 3.684444  | -0.062801 | -1.776303 |
| H  | 0.497139  | -3.718397 | -1.742793 | H | 3.365240  | -0.657435 | -2.617146 |
| H  | -0.173707 | -3.545938 | -3.376225 |   |           |           |           |
| C  | -2.638169 | 3.544897  | 0.259583  |   |           |           |           |
| H  | -3.199261 | 4.090949  | -0.507962 |   |           |           |           |
| H  | -2.869663 | 4.026509  | 1.216626  |   |           |           |           |

## References

- 1) Vorogushin, A. V.; Huang, X.; Buchwald, S. L. *J. Am. Chem. Soc.* **2005**, *127*, 8146.
- 2) Fors, B. P.; Dooleweerd, K.; Zeng, Q.; Buchwald, S. L. *Tetrahedron* **2009**, *65*, 6576.
- 3) Frisch, M. J.; Trucks, G. W.; Schlegel, H. B.; Scuseria, G. E.; Robb, M. A.; Cheeseman, J. R.; Montgomery, Jr., J. A.; Vreven, T.; Kudin, K. N.; Burant, J. C.; Millam, J. M.; Iyengar, S. S.; Tomasi, J.; Barone, V.; Mennucci, B.; Cossi, M.; Scalmani, G.; Rega, N.; Petersson, G. A.; Nakatsuji, H.; Hada, M.; Ehara, M.; Toyota, K.; Fukuda, R.; Hasegawa, J.; Ishida, M.; Nakajima, T.; Honda, Y.; Kitao, O.; Nakai, H.; Klene, M.; Li, X.; Knox, J. E.; Hratchian, H. P.; Cross, J. B.; Bakken, V.; Adamo, C.; Jaramillo, J.; Gomperts, R.; Stratmann, R. E.; Yazyev, O.; Austin, A. J.; Cammi, R.; Pomelli, C.; Ochterski, J. W.; Ayala, P. Y.; Morokuma, K.; Voth, G. A.; Salvador, P.; Dannenberg, J. J.; Zakrzewski, V. G.; Dapprich, S.; Daniels, A. D.; Strain, M. C.; Farkas, O.; Malick, D. K.; Rabuck, A. D.; Raghavachari, K.; Foresman, J. B.; Ortiz, J. V.; Cui, Q.; Baboul, A. G.; Clifford, S.; Cioslowski, J.; Stefanov, B. B.; Liu, G.; Liashenko, A.; Piskorz, P.; Komaromi, I.; Martin, R. L.; Fox, D. J.; Keith, T.; Al-Laham, M. A.; Peng, C. Y.; Nanayakkara, A.; Challacombe, M.; Gill, P. M. W.; Johnson, B.; Chen, W.; Wong, M. W.; Gonzalez, C.; Pople, J. A. *Gaussian 03*, Revision E.01; Gaussian, Inc.: Wallingford CT, 2004.
- 4) (a) Becke, A. D. *J. Chem. Phys.* **1993**, *98*, 1372. (b) Becke, A. D. *J. Chem. Phys.* **1993**, *98*, 5648. (c) Lee, C. T.; Yang, W. T.; Parr, R. G. *Phys. Rev. B* **1988**, *37*, 785–789.
- 5) Hay, P. J.; Wadt, W. R. *J. Chem. Phys.* **1985**, *82*, 299.
- 6) Jin, T.; Kamijo, S.; Yamamoto, Y. *Eur. J. Org. Chem.* **2004**, 3789.
- 7) Kalisiak, J.; Sharpless, K. B.; Fokin, V. V. *Org. Lett.* **2008**, *10*, 3171.

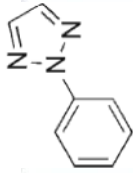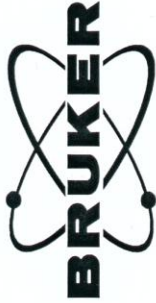

Current Data Parameters  
 NAME 1-99-1  
 EXPNO 99  
 PROCNO 99

F2 - Acquisition Parameters  
 Date\_ 20100804  
 Time 7.24  
 INSTRUM spect  
 PROBHD 5 mm QNP 1H/13  
 PULPROG zg30  
 TD 65536  
 SOLVENT CDCl3  
 NS 16  
 DS 2  
 SWH 8278.146 Hz  
 FIDRES 0.126314 Hz  
 AQ 3.9584243 sec  
 RG 287.4  
 DW 60.400 usec  
 DE 6.00 usec  
 TE 295.2 K  
 D1 1.00000000 sec  
 TD0 1

==== CHANNEL f1 =====  
 NUC1 1H  
 P1 13.88 usec  
 PL1 0.00 dB  
 SFO1 400.1324710 MHz

F2 - Processing parameters  
 SI 32768  
 SF 400.1300092 MHz  
 WDW no  
 SSB 0  
 LB 0.00 Hz  
 GB 0  
 PC 1.00

8.107  
8.104  
8.085  
8.083  
7.809  
7.504  
7.485  
7.483  
7.481  
7.468  
7.464  
7.366  
7.348  
7.329

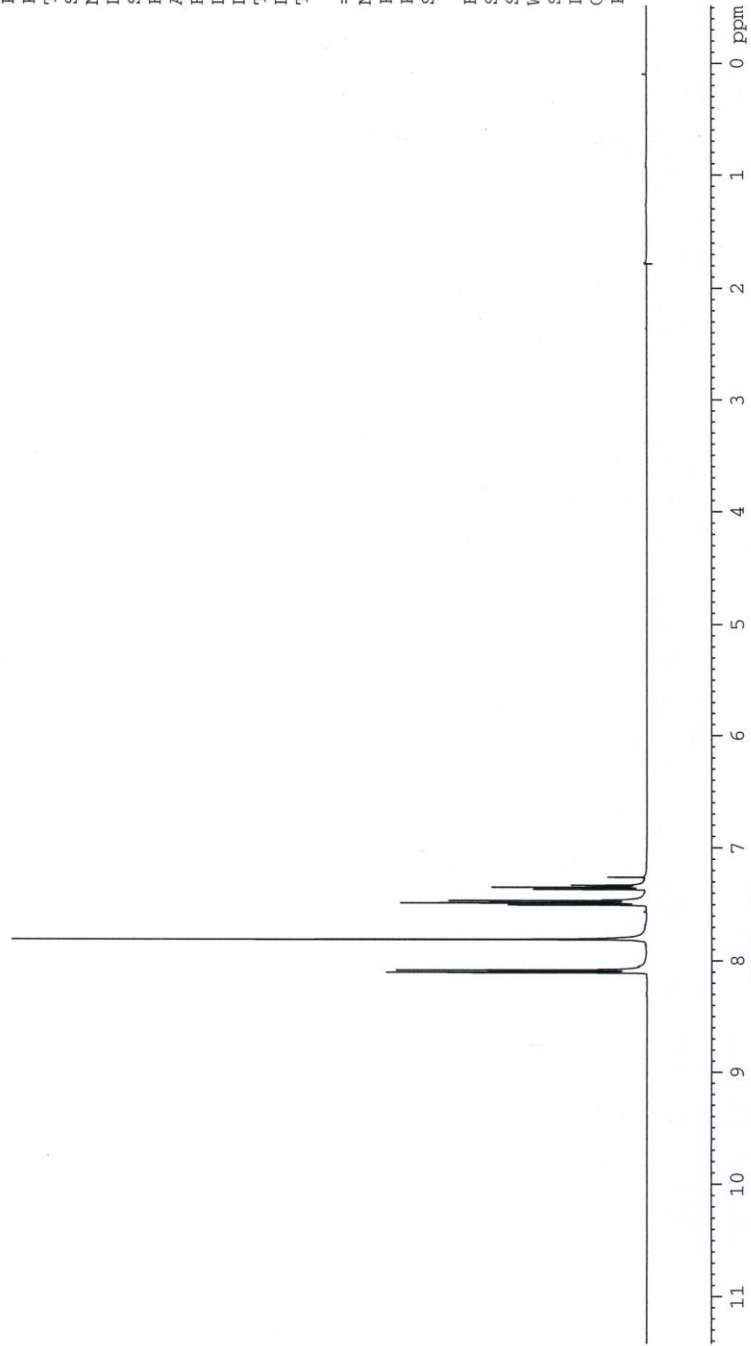

1.94  
1.90  
2.01  
1.04

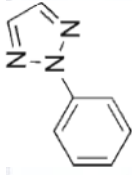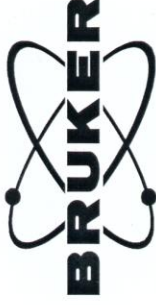

1-99-1C

Current Data Parameters  
 NAME 1-99-1C  
 EXPNO 99  
 PROCNO 99

F2 - Acquisition Parameters  
 Date\_ 20100804  
 Time 7.38  
 INSTRUM spect  
 PROBHD 5 mm QNP 1H/13  
 PULPROG zgpg30  
 TD 65536  
 SOLVENT CDCl3  
 NS 128  
 DS 4  
 SWH 23980.814 Hz  
 FIDRES 0.365918 Hz  
 AQ 1.3664756 sec  
 RG 1448.2  
 DW 20.850 usec  
 DE 6.00 usec  
 TE 295.2 K  
 D1 2.00000000 sec  
 d11 0.03000000 sec  
 DELTA 1.89999998 sec  
 TDO 1

==== CHANNEL f1 =====  
 NUC1 13C  
 P1 9.38 usec  
 PL1 0.00 dB  
 SFO1 100.6228298 MHz

==== CHANNEL f2 =====  
 CPDPRG2 waltz16  
 NUC2 1H  
 PCPD2 90.00 usec  
 PL2 0.00 dB  
 PL12 16.10 dB  
 PL13 19.00 dB  
 SFO2 400.1316005 MHz

F2 - Processing parameters  
 SI 32768  
 SF 100.6127544 MHz  
 WDW no  
 SSB 0  
 LB 0.00 Hz  
 GB 0  
 PC 1.40

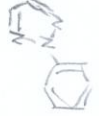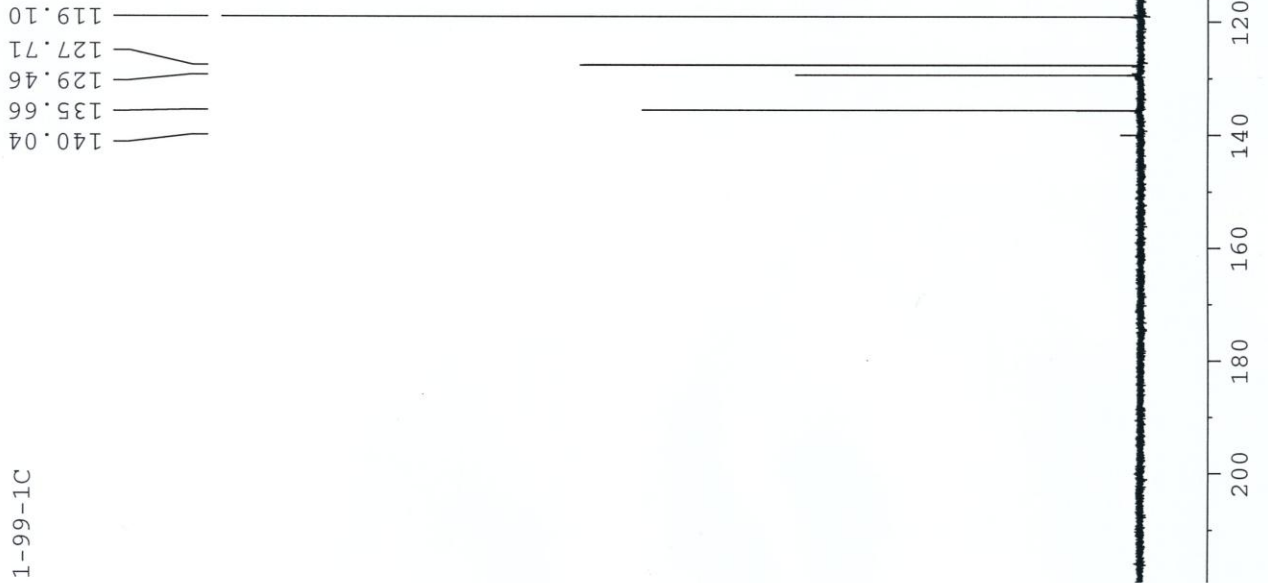

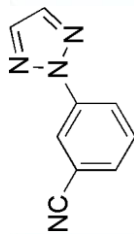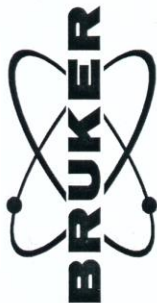

Current Data Parameters  
 NAME SU1-99-2  
 EXPNO 1  
 PROCNO 1

F2 - Acquisition Parameters  
 Date\_ 20100902  
 Time 10.32  
 INSTRUM spect  
 PROBHD 5 mm QNP 1H/13  
 PULPROG zg30  
 TD 65536  
 SOLVENT CDCl3  
 NS 9  
 DS 2  
 SWH 8278.146 Hz  
 FIDRES 0.126314 Hz  
 AQ 3.9584243 sec  
 RG 101.6  
 DW 60.400 usec  
 DE 6.00 usec  
 TE 295.2 K  
 D1 1.0000000 sec  
 TD0 1

==== CHANNEL f1 =====  
 NUC1 1H  
 P1 14.00 usec  
 PL1 0.00 dB  
 SFO1 400.1324710 MHz

F2 - Processing parameters  
 SI 65536  
 SF 400.1300094 MHz  
 WDW no  
 SSB 0  
 LB 0.00 Hz  
 GB 0  
 PC 1.00

8.336  
8.298  
8.295  
8.290  
8.279  
8.276  
8.271  
8.211  
7.821  
7.595  
7.592  
7.576  
7.572  
7.553  
7.534

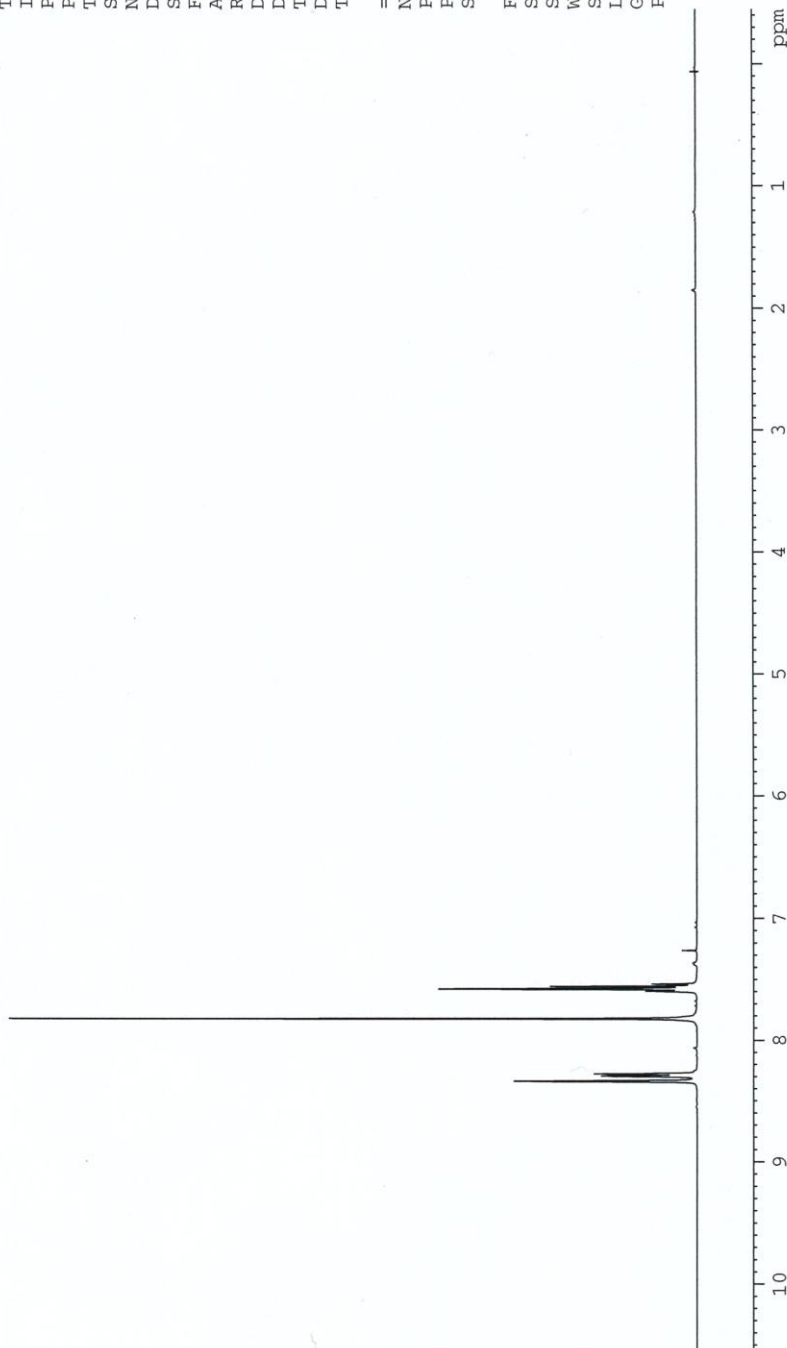

1.01  
1.03  
2.04  
2.17

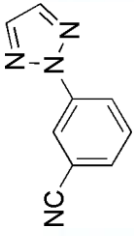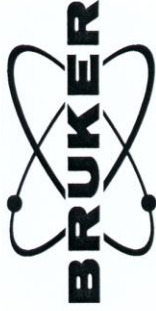

SU1-99-2C

140.14  
136.51  
130.76  
130.38  
122.86  
122.17  
117.97  
113.55

Current Data Parameters  
 NAME SU1-99-2C  
 EXPNO 1  
 PROCNO 1

F2 - Acquisition Parameters  
 Date\_ 20100902  
 Time 10.40  
 INSTRUM spect  
 PROBD 5 mm QNP 1H/13  
 PULPROG zgpg30  
 TD 65536  
 SOLVENT CDCl3  
 NS 128  
 DS 4  
 SWH 23980.814 Hz  
 FIDRES 0.365918 Hz  
 AQ 1.3664756 sec  
 RG 1625.5  
 DW 20.850 usec  
 DE 6.00 usec  
 TE 296.2 K  
 D1 2.00000000 sec  
 d11 0.03000000 sec  
 DELTA 1.89999998 sec  
 TDO 1

==== CHANNEL f1 =====  
 NUC1 13C  
 P1 9.38 usec  
 PL1 0.00 GB  
 SFO1 100.6228298 MHz

==== CHANNEL f2 =====  
 CPDPRG2 waltz16  
 NUC2 1H  
 PCPD2 90.00 usec  
 PL2 0.00 GB  
 PL12 16.10 GB  
 PL13 19.00 GB  
 SFO2 400.1316005 MHz

F2 - Processing parameters  
 SI 32768  
 SF 100.6127640 MHz  
 WDW no  
 SSB 0  
 LB 0.00 Hz  
 GB 0  
 PC 1.40

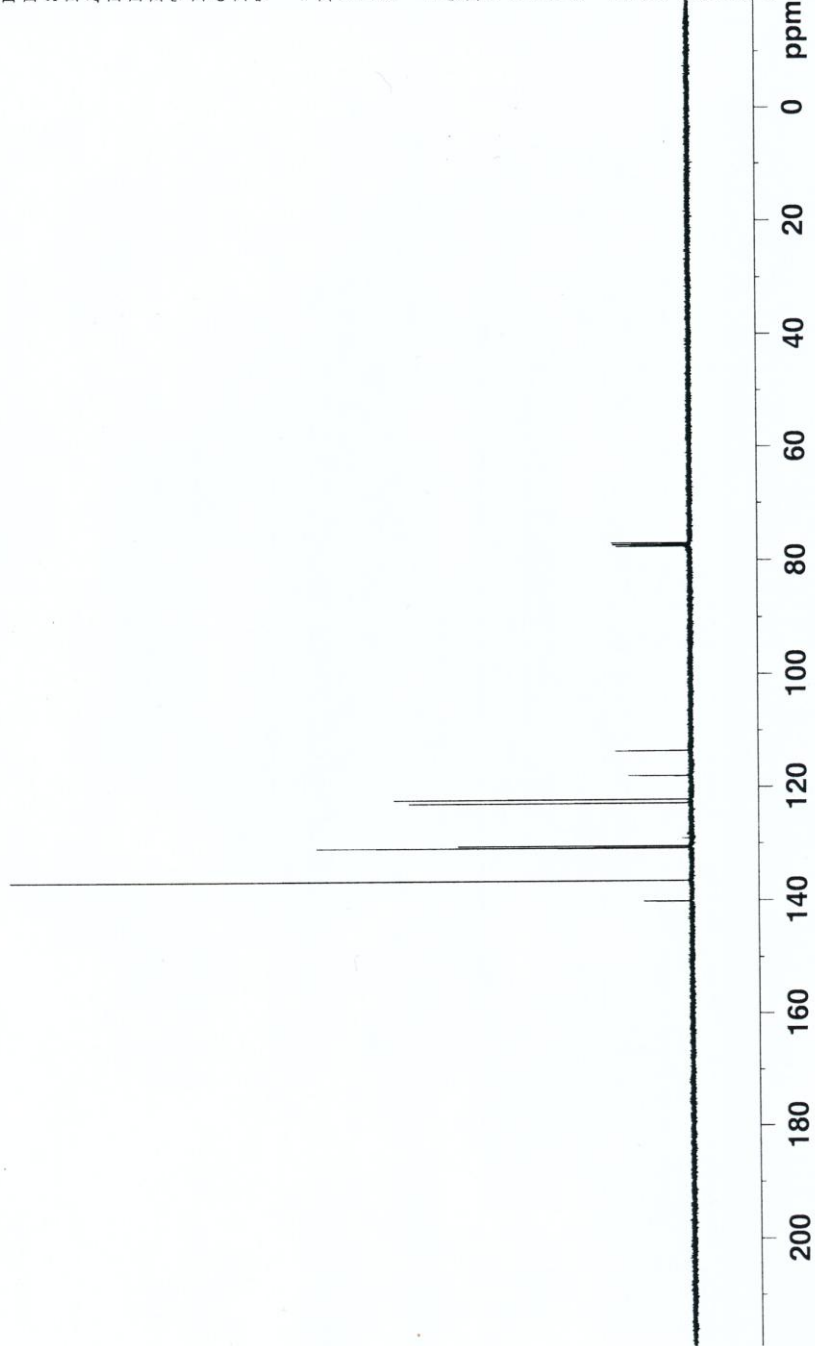



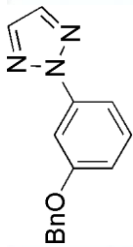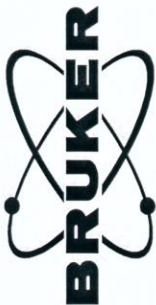

Current Data Parameters  
 NAME SUI-99-8  
 EXENO 1  
 PROCNO 1

F2 - Acquisition Parameters  
 Date\_ 20100902  
 Time 10.04  
 INSTRUM spect  
 PROBHD 5 mm QNP 1H/13  
 PULPROG zg30  
 TD 65536  
 SOLVENT CDCl3  
 NS 8  
 DS 2  
 SWH 8278.146 Hz  
 FIDRES 0.126314 Hz  
 AQ 3.9584243 sec  
 RG 35.9  
 DW 60.400 usec  
 DE 6.00 usec  
 TE 295.2 K  
 D1 1.00000000 sec  
 TD0 1

==== CHANNEL f1 =====  
 NUC1 1H  
 P1 14.00 usec  
 PL1 0.00 dB  
 SFO1 400.1324710 MHz

F2 - Processing parameters  
 SI 65536  
 SF 400.1300090 MHz  
 WDW no  
 SSB 0  
 LB 0.00 Hz  
 GB 0  
 PC 1.00

7.857  
7.851  
7.846  
7.819  
7.795  
7.777  
7.775  
7.772  
7.7516  
7.499  
7.457  
7.440  
7.436  
7.428  
7.421  
7.408  
7.387  
7.378  
7.360  
7.022  
7.021  
7.016  
7.014  
7.002  
7.000  
6.995  
5.156

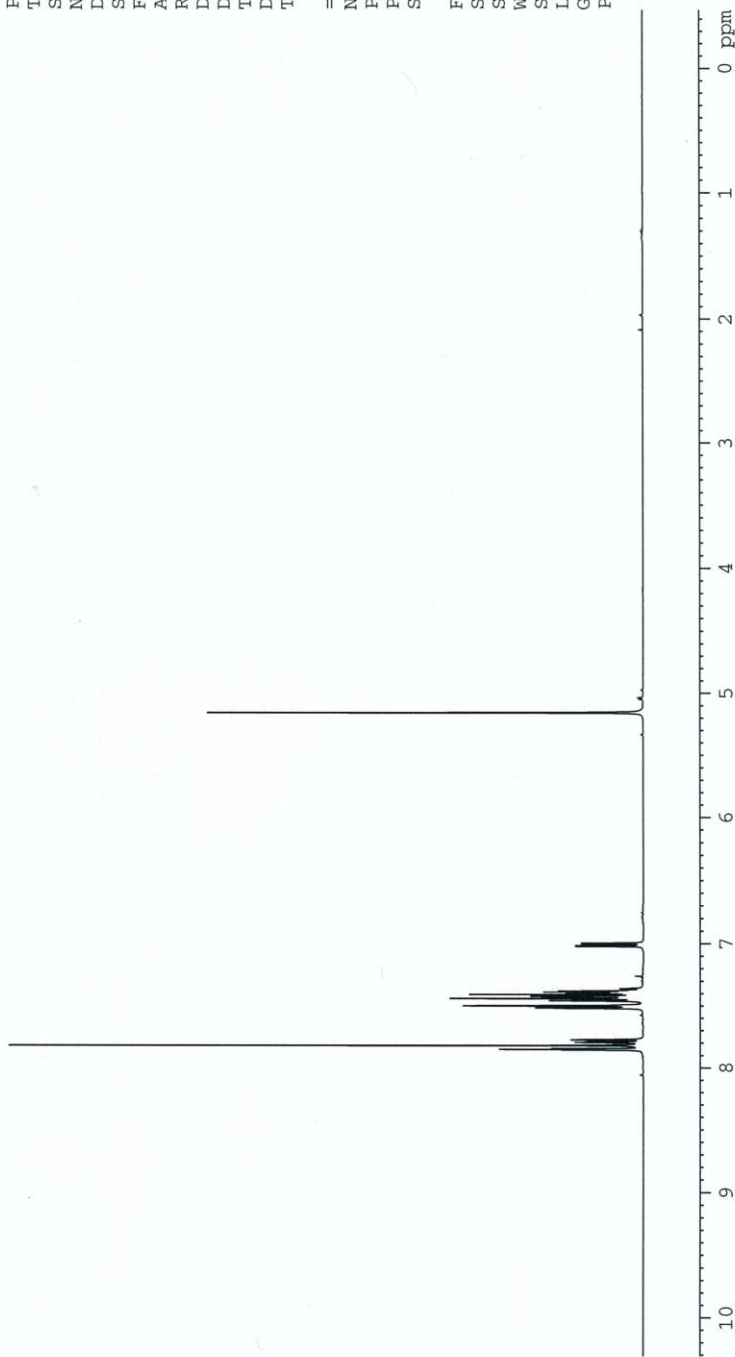

10  
9  
8  
7  
6  
5  
4  
3  
2  
1  
0 ppm

0.99  
1.85  
1.05  
2.01  
4.18  
1.01  
2.03

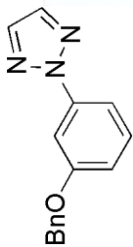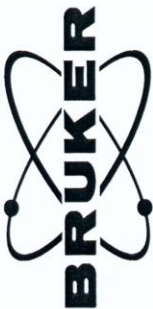

SU1-99-8C

Current Data Parameters  
 NAME SU1-99-8C  
 EXPNO 1  
 PROCNO 1

F2 - Acquisition Parameters

Date\_ 20100902  
 Time 10.13  
 INSTRUM spect  
 PROBD 5 mm QNP 1H/13  
 PULPROG zgpg30  
 TD 65536  
 SOLVENT CDCl3  
 NS 128  
 DS 4  
 SWH 23980.814 Hz  
 FIDRES 0.365918 Hz  
 AQ 1.3664756 sec  
 RG 2580.3  
 DW 20.850 usec  
 DE 6.00 usec  
 TE 295.2 K  
 d1 2.0000000 sec  
 d11 0.0300000 sec  
 DELTA 1.8999998 sec  
 TD0 1

==== CHANNEL f1 =====  
 NUC1 13C  
 P1 9.38 usec  
 PL1 0.00 dB  
 SFO1 100.6228298 MHz

==== CHANNEL f2 =====  
 CPDPRG2 waltz16  
 NUC2 1H  
 PCPD2 90.00 usec  
 PL2 0.00 dB  
 PL12 16.10 dB  
 PL13 19.00 dB  
 SFO2 400.1316005 MHz

F2 - Processing parameters  
 SI 32768  
 SF 100.6127736 MHz  
 NO  
 SSB 0  
 LB 0.00 Hz  
 GB 0  
 PC 1.40

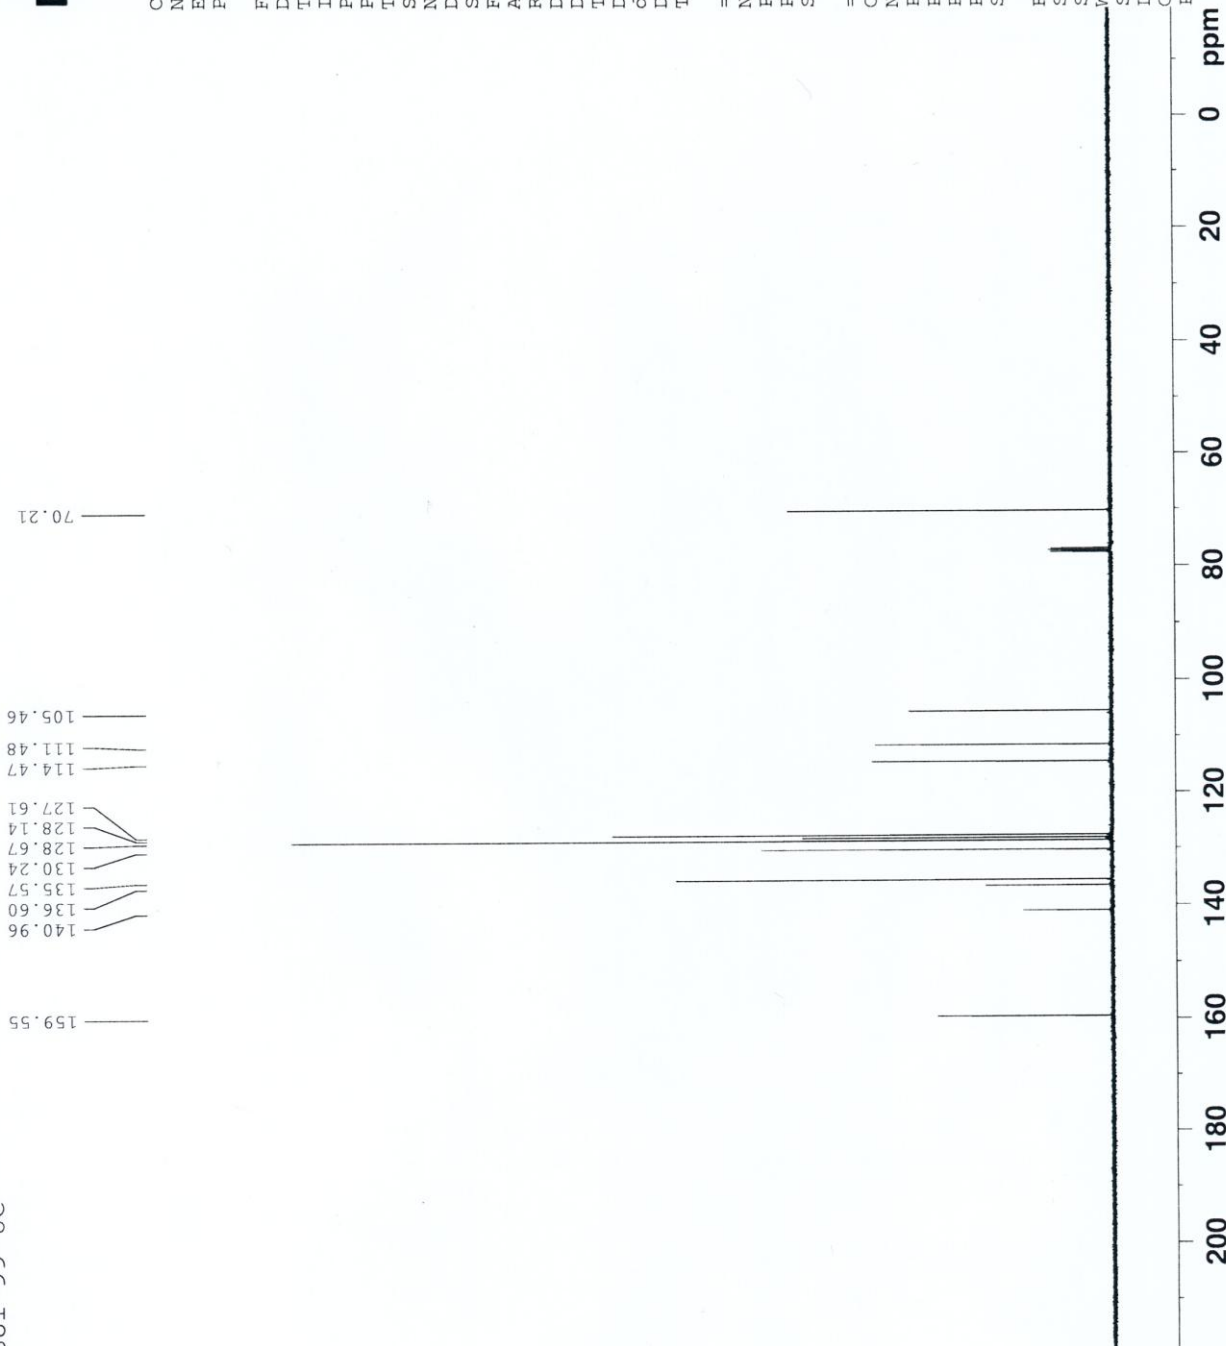

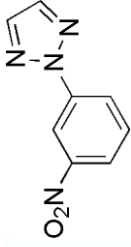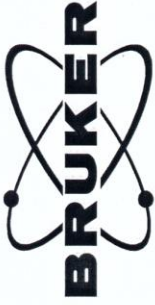

Current Data Parameters  
 NAME SU1-99-7  
 EXPNO 1  
 PROCNO 1

F2 - Acquisition Parameters  
 Date\_ 20100829  
 Time 14.26  
 INSTRUM spect  
 PROBHD 5 mm QNP 1H/13  
 PULPROG zg30  
 TD 65536  
 SOLVENT CDC13  
 NS 8  
 DS 2  
 SWH 8278.146 Hz  
 FIDRES 0.126314 Hz  
 AQ 3.9584243 sec  
 RG 161.3  
 DW 60.400 usec  
 DE 6.00 usec  
 TE 300.0 K  
 D1 1.00000000 sec  
 TD0 1

==== CHANNEL f1 =====  
 NUC1 1H  
 P1 14.00 usec  
 PL1 0.00 dB  
 SFO1 400.1324710 MHz

F2 - Processing parameters  
 SI 65536  
 SF 400.1300096 MHz  
 WDW no  
 SSB 0  
 LB 0.00 Hz  
 GB 0  
 PC 1.00

8.912  
8.907  
8.902  
8.413  
8.411  
8.408  
8.406  
8.393  
8.390  
8.388  
8.385  
8.186  
8.183  
8.180  
8.178  
8.165  
8.163  
8.159  
8.157  
7.858  
7.670  
7.670  
7.649  
7.629

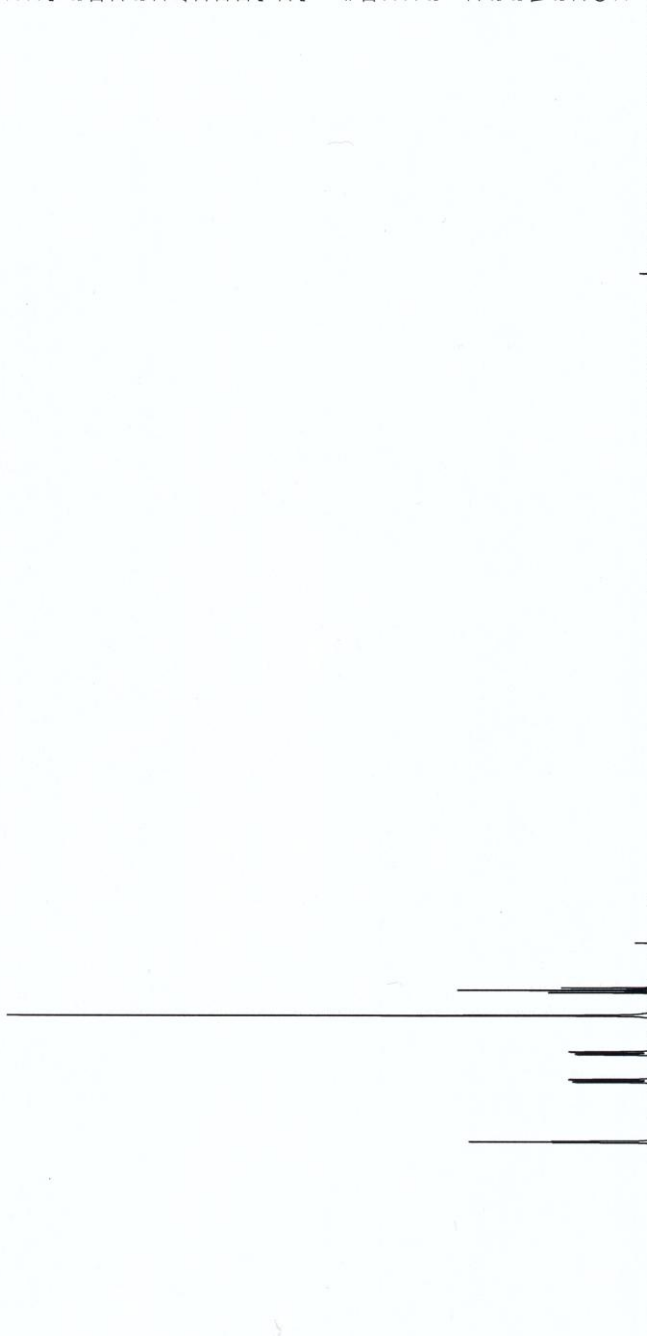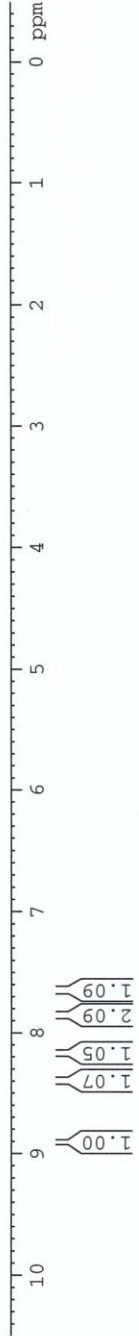

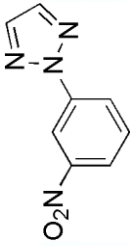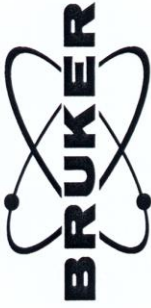

SU1-99-7C

Current Data Parameters  
 NAME SU1-99-7C  
 EXPNO 1  
 PROCNO 1

F2 - Acquisition Parameters  
 Date\_ 20100829  
 Time 14.35  
 INSTRUM spect  
 PROBHD 5 mm QNP 1H/13  
 PULPROG zgpg30  
 TD 65536  
 SOLVENT CDCl3  
 NS 128  
 DS 4  
 SWH 23980.814 Hz  
 FIDRES 0.365918 Hz  
 AQ 1.3664756 sec  
 RG 4096  
 DW 20.850 usec  
 DE 6.00 usec  
 TE 296.2 K  
 D1 2.00000000 sec  
 d11 0.03000000 sec  
 DELTA 1.89999998 sec  
 TD0 1

==== CHANNEL f1 =====  
 NUC1 13C  
 P1 9.38 usec  
 PL1 0.00 dB  
 SFO1 100.6228298 MHz

==== CHANNEL f2 =====  
 CPDPRG2 waltz16  
 NUC2 1H  
 PCPD2 90.00 usec  
 PL2 0.00 dB  
 PL12 16.10 dB  
 PL13 19.00 dB  
 SFO2 400.1316005 MHz

F2 - Processing parameters  
 SI 32768  
 SF 100.6127544 MHz  
 WDW no  
 SSB 0  
 LB 0.00 Hz  
 GB 0  
 PC 1.40

149.02  
 140.55  
 136.71  
 130.49  
 124.40  
 122.02  
 114.16

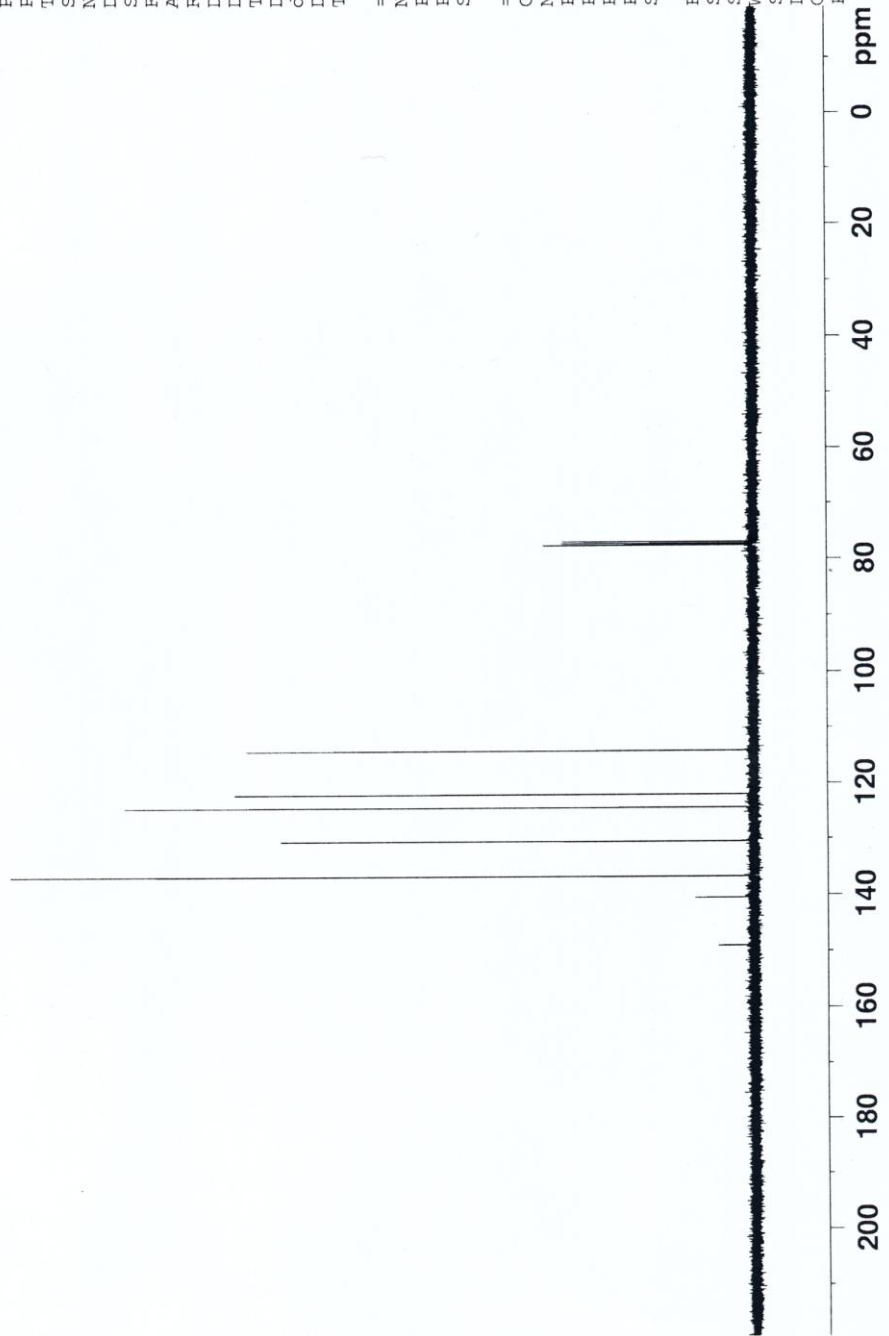

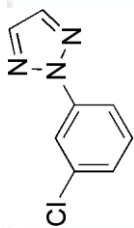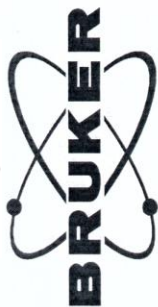

Current Data Parameters  
 NAME SUI-30-38  
 EXPNO 1  
 PROCNO 1

F2 - Acquisition Parameters  
 Date\_ 20110107  
 Time 10.25  
 INSTRUM spect  
 PROBHD 5 mm QNP 1H/13  
 PULPROG zg30  
 TD 65536  
 SOLVENT CDCl3  
 NS 8  
 DS 2  
 SWH 8278.146 Hz  
 FIDRES 0.126314 Hz  
 AQ 3.9584243 sec  
 RG 114  
 DW 60.400 usec  
 DE 6.00 usec  
 TE 296.2 K  
 D1 1.00000000 sec  
 TD0 1

==== CHANNEL f1 =====  
 NUC1 1H  
 P1 14.00 usec  
 PL1 0.00 dB  
 SFO1 400.1324710 MHz

F2 - Processing parameters  
 SI 65536  
 SF 400.1300096 MHz  
 WDW no  
 SSB 0  
 LB 0.00 Hz  
 GB 0  
 PC 1.00

8.115  
8.110  
8.104  
7.980  
7.977  
7.975  
7.972  
7.959  
7.957  
7.954  
7.952  
7.796  
7.400  
7.399  
7.380  
7.360  
7.309  
7.307  
7.304  
7.302  
7.289  
7.287  
7.284  
7.282

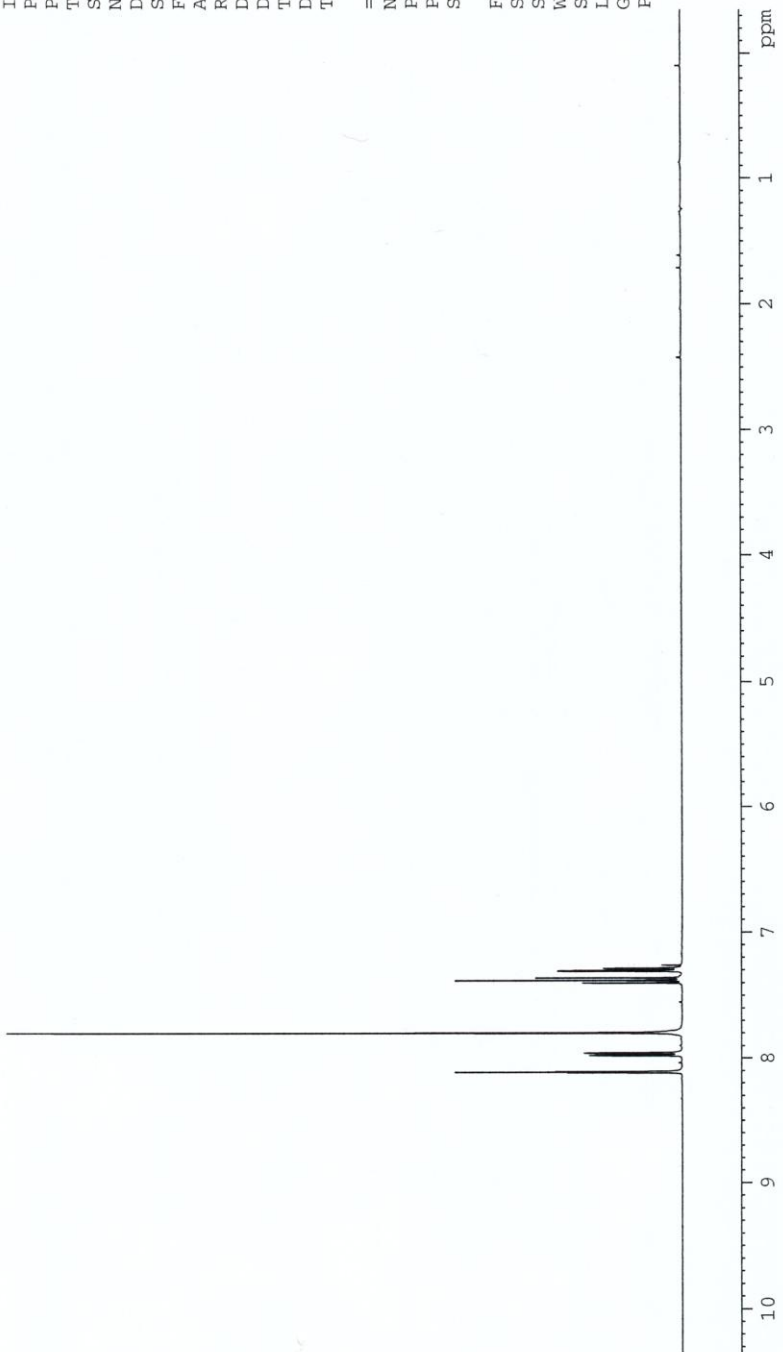

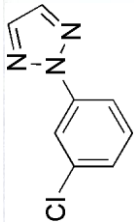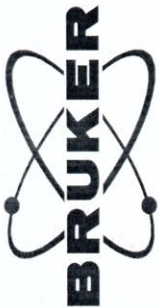

Current Data Parameters  
 NAME SUI-30-38C  
 EXPNO 1  
 PROCNO 1

F2 - Acquisition Parameters  
 Date\_ 20110107  
 Time 10.34  
 INSTRUM spect  
 PROBHD 5 mm QNP 1H/13  
 PULPROG zgpg30  
 TD 65536  
 SOLVENT CDCl3  
 NS 128  
 DS 4  
 SWH 23980.814 Hz  
 FIDRES 0.365918 Hz  
 AQ 1.3664756 sec  
 RG 1625.5  
 DW 20.850 usec  
 DE 6.00 usec  
 TE 296.2 K  
 DI 2.00000000 sec  
 d11 0.03000000 sec  
 DELTA 1.89999998 sec  
 TD0 1

==== CHANNEL f1 =====  
 NUC1 13C  
 P1 9.38 usec  
 PL1 0.00 dB  
 SFO1 100.6228298 MHz

==== CHANNEL f2 =====  
 CPDPRG2 waltz16  
 NUC2 1H  
 PCPD2 90.00 usec  
 PL2 0.00 dB  
 PL12 16.10 dB  
 PL13 19.00 dB  
 SFO2 400.1316005 MHz

F2 - Processing parameters  
 SI 32768  
 SF 100.6127541 MHz  
 WDW no  
 SSB 0  
 LB 0.00 Hz  
 GB 0  
 PC 1.40

140.77  
 136.06  
 135.27  
 130.49  
 127.65  
 119.38  
 117.08

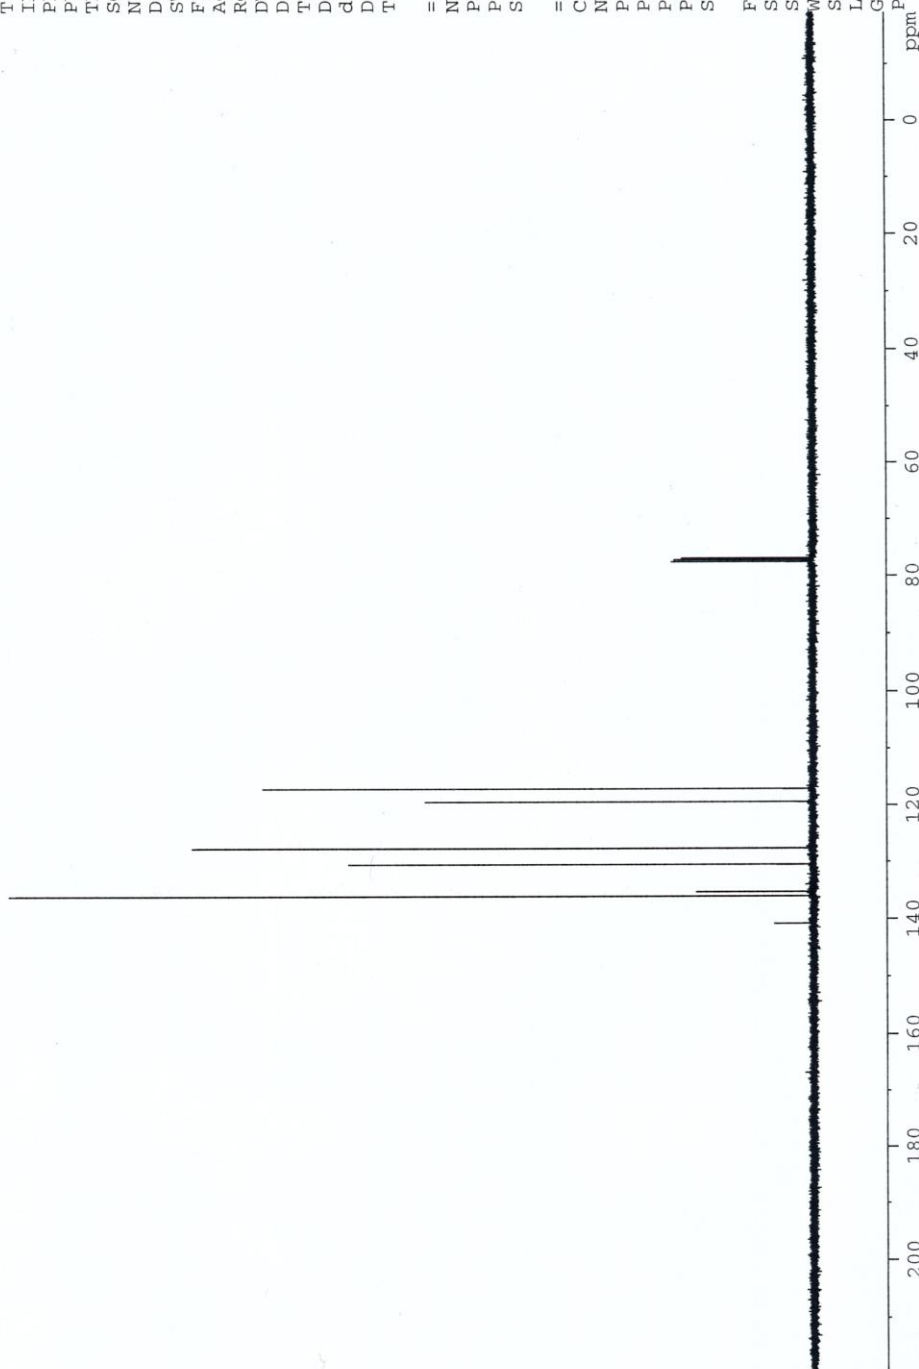



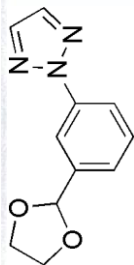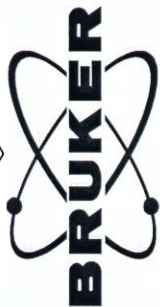

Current Data Parameters  
 NAME SUI-107-7  
 EXPNO 1  
 PROCNO 1

F2 - Acquisition Parameters  
 Date\_ 20100909  
 Time 10.12  
 INSTRUM spect  
 PROBHD 5 mm QNP 1H/13  
 PULPROG zg30  
 TD 65536  
 SOLVENT CDCl3  
 NS 8  
 DS 2  
 SWH 8278.146 Hz  
 FIDRES 0.126314 Hz  
 AQ 3.9584243 sec  
 RG 57  
 DW 60.400 usec  
 DE 6.00 usec  
 TE 295.2 K  
 D1 1.0000000 sec  
 TD0 1

==== CHANNEL f1 =====  
 NUC1 1H  
 P1 14.00 usec  
 PL1 0.00 dB  
 SFO1 400.1324710 MHz

F2 - Processing parameters  
 SI 65536  
 SF 400.1300094 MHz  
 WDW no  
 SSB 0  
 LB 0.00 Hz  
 GB 0  
 PC 1.00

4.138  
4.125  
4.120  
4.116  
4.111  
4.103  
4.078  
4.063  
4.037  
4.030  
4.025  
4.020  
4.019  
4.016  
4.002

5.875

7.230  
8.225  
8.221  
8.094  
8.089  
8.084  
8.075  
8.070  
8.065  
7.786  
7.501  
7.482  
7.464  
7.462  
7.457  
7.453  
7.453  
7.437

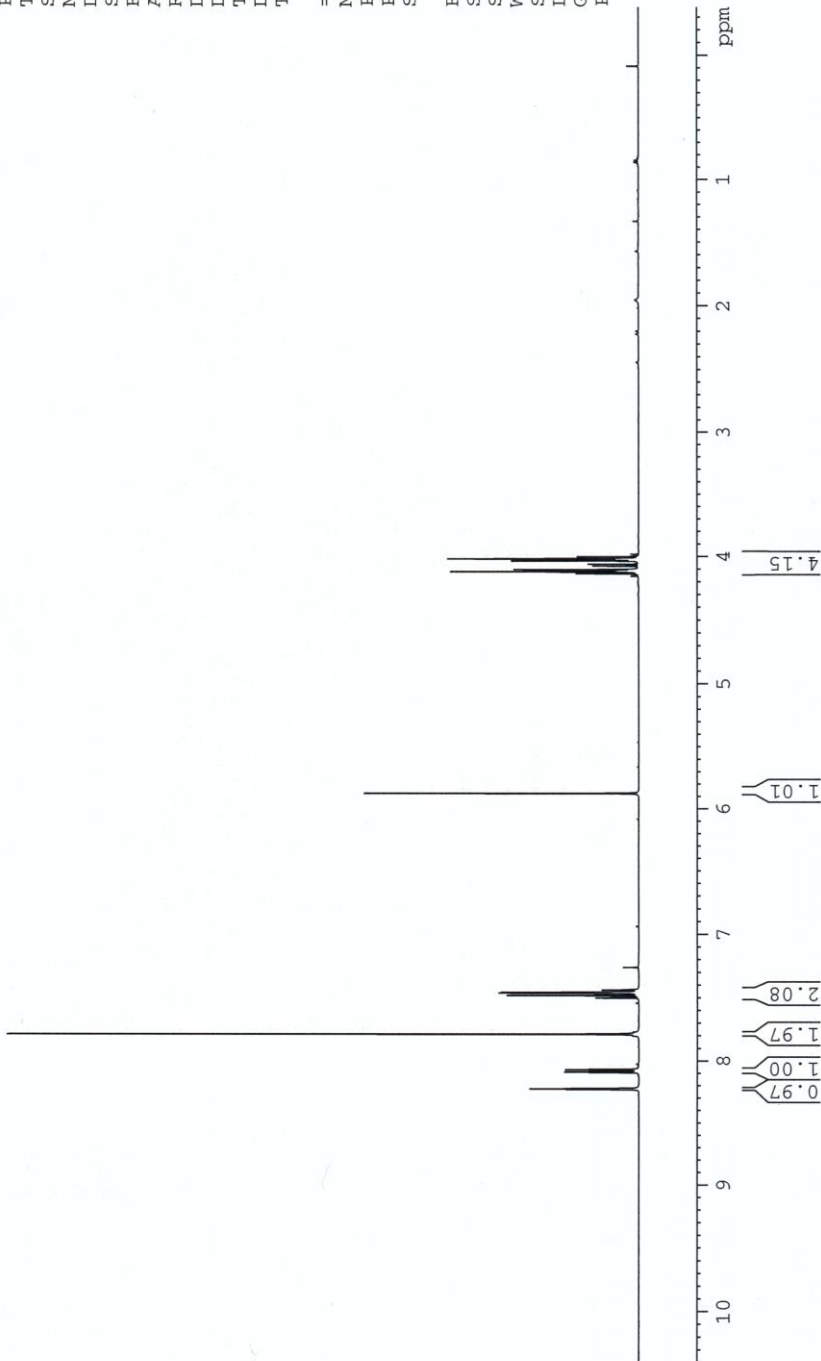

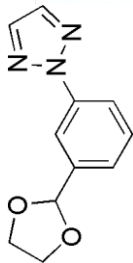

SU1-107-7C

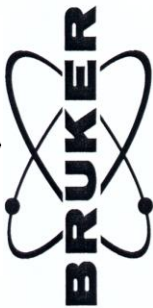

Current Data Parameters  
 NAME SU1-107-7C  
 EXPNO 1  
 PROCNO 1

F2 - Acquisition Parameters  
 Date\_ 20100909  
 Time 10.21  
 INSTRUM spect  
 PROBHD 5 mm QNP 1H/13  
 PULPROG zgpg30  
 TD 65536  
 SOLVENT CDCl3  
 NS 128  
 DS 4  
 SWH 23980.814 Hz  
 FIDRES 0.365918 Hz  
 AQ 1.3664756 sec  
 RG 3649.1  
 DW 20.850 usec  
 DE 6.00 usec  
 TE 295.2 K  
 D1 2.0000000 sec  
 d11 0.0300000 sec  
 DELTA 1.89999998 sec  
 TDO 1

==== CHANNEL f1 =====  
 NUC1 13C  
 P1 9.38 usec  
 PL1 0.00 dB  
 SFO1 100.6228298 MHz

==== CHANNEL f2 =====  
 CPDPRG2 waltz16  
 NUC2 1H  
 PCPD2 90.00 usec  
 PL2 0.00 dB  
 PL12 16.10 dB  
 PL13 19.00 dB  
 SFO2 400.1316005 MHz

F2 - Processing parameters  
 SI 32768  
 SF 100.6127554 MHz  
 WDW ho  
 SSB 0  
 LB 0.00 Hz  
 GB 0  
 PC 1.40

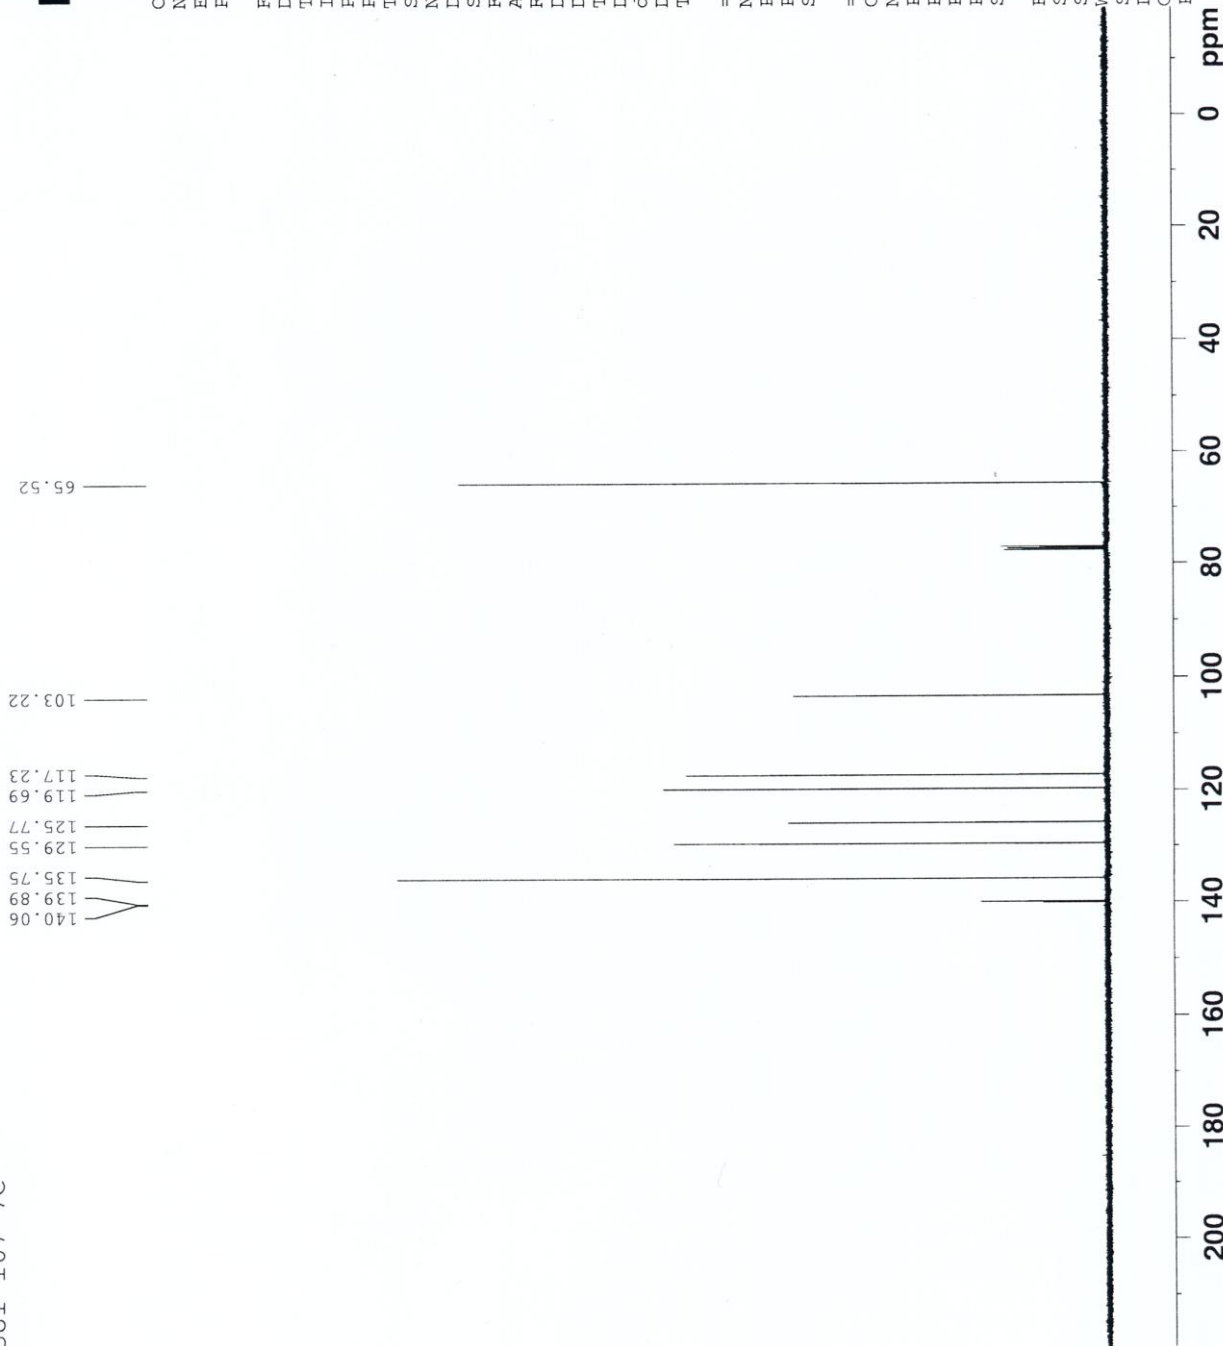



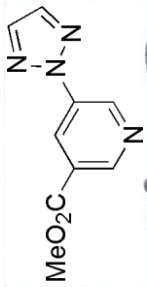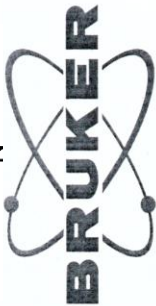

Current Data Parameters  
 NAME SUI-111-1  
 EXPNO 1  
 PROCNO 1

F2 - Acquisition Parameters  
 Date\_ 20110302  
 Time 8.52  
 INSTRUM spect  
 PROBHD 5 mm QNP 1H/13  
 PULPROG zg30  
 TD 65536  
 SOLVENT CDCl3  
 NS 8  
 DS 2  
 SWH 8278.146 Hz  
 FIDRES 0.126314 Hz  
 AQ 3.9584243 sec  
 RG 161.3  
 DW 60.400 usec  
 DE 6.00 usec  
 TE 295.2 K  
 D1 1.00000000 sec  
 TD0 1

==== CHANNEL f1 =====  
 NUC1 1H  
 P1 14.00 usec  
 PL1 0.00 dB  
 SFO1 400.1324710 MHz

F2 - Processing parameters  
 SI 65536  
 SF 400.1300090 MHz  
 WDW no  
 SSB 0  
 LB 0  
 GB 0  
 PC 1.00

3.947

7.842

9.470  
 9.464  
 9.132  
 9.126  
 8.862  
 8.857  
 8.852

3.16

2.05

1.00  
 1.01  
 0.98

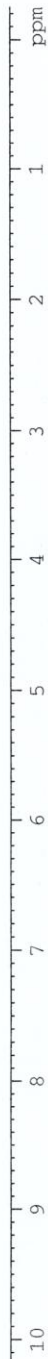

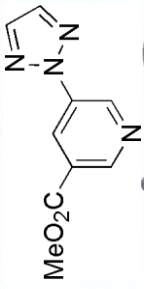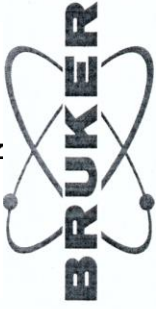

Current Data Parameters  
 NAME SUI-111-1C  
 EXPNO 1  
 PROCNO 1

F2 - Acquisition Parameters  
 Date\_ 20110302  
 Time 9.00  
 INSTRUM spect  
 PROBD 5 mm QNP 1H/13  
 PULPROG zgpg30  
 TD 65536  
 SOLVENT CDCl3  
 NS 128  
 DS 4  
 SWH 23980.814 Hz  
 FIDRES 0.365918 Hz  
 AQ 1.3664756 sec  
 RG 1625.5  
 DW 20.850 usec  
 DE 6.00 usec  
 TE 296.2 K  
 D1 2.00000000 sec  
 d11 0.03000000 sec  
 DELTA 1.89999998 sec  
 TDO 1

==== CHANNEL f1 =====  
 NUC1 13C  
 P1 9.38 usec  
 PL1 0.00 dB  
 SFO1 100.62828298 MHz

==== CHANNEL f2 =====  
 CPDPRG2 waltz16  
 NUC2 1H  
 PCPD2 90.00 usec  
 PL2 0.00 dB  
 PL12 16.10 dB  
 PL13 19.00 dB  
 SFO2 400.1316005 MHz

F2 - Processing parameters  
 SI 32768  
 SF 100.6127560 MHz  
 WDW no  
 SSB 0  
 LB 0.00 Hz  
 GB 0  
 PC 1.40

164.96  
 149.28  
 144.03  
 136.79  
 136.05  
 126.84  
 126.57  
 52.81

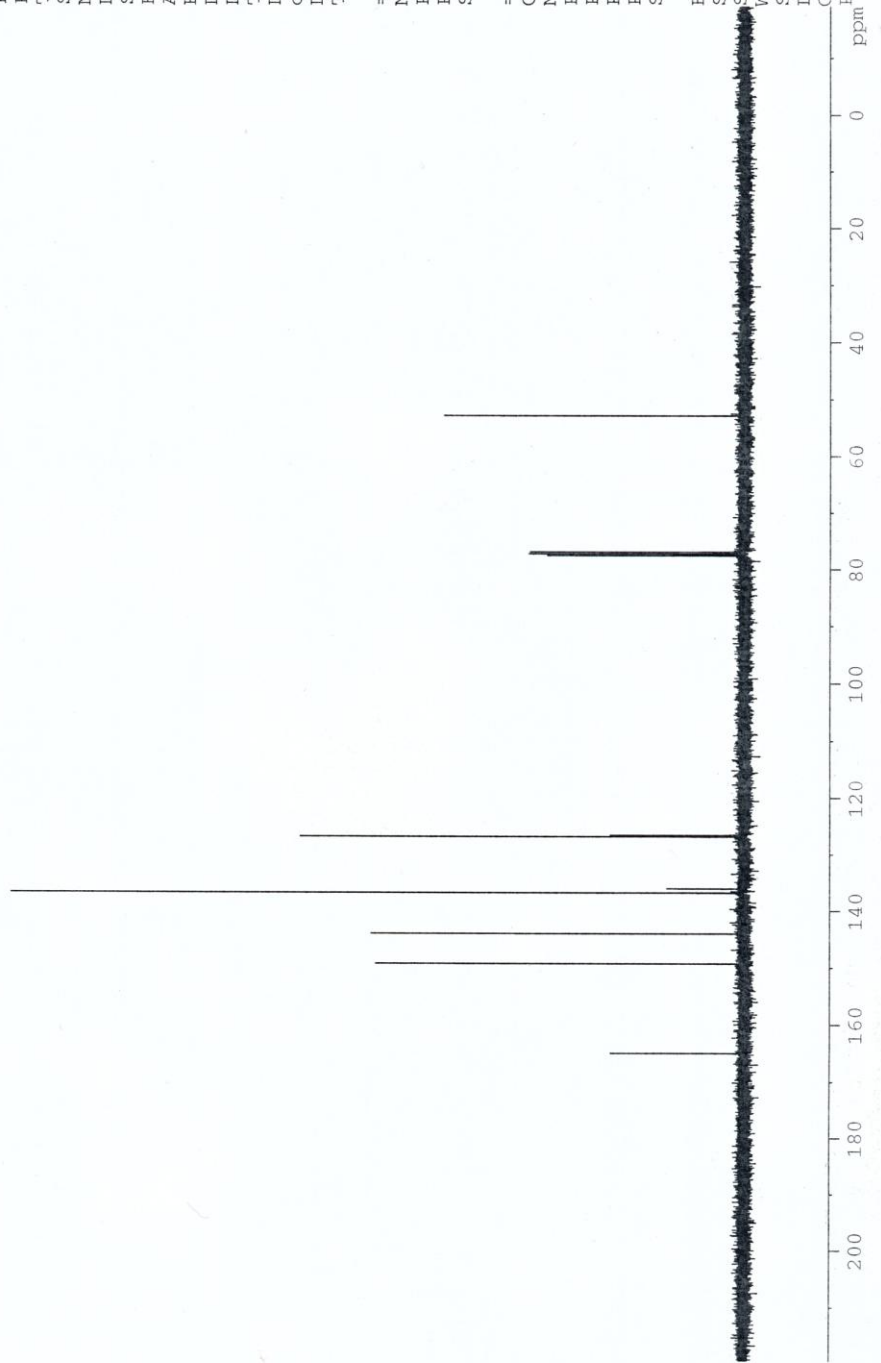

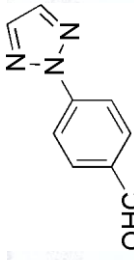

9.994  
8.222  
8.200  
7.964  
7.943  
7.834

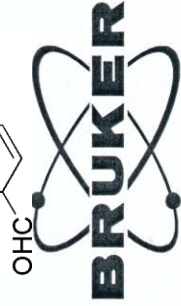

Current Data Parameters  
 NAME SU1-149  
 EXPNO 2  
 PROCNO 2

F2 - Acquisition Parameters  
 Date\_ 20101005  
 Time 9.00  
 INSTRUM spect  
 PROBHD 5 mm BBO BB-1H  
 PULPROG zg30  
 TD 65536  
 SOLVENT CDCl3  
 NS 16  
 DS 2  
 SWH 8278.146 Hz  
 FIDRES 0.126314 Hz  
 AQ 3.9584243 sec  
 RG 57  
 DW 60.400 usec  
 DE 6.00 usec  
 TE 296.2 K  
 D1 1.00000000 sec  
 TD0 1

==== CHANNEL f1 =====  
 NUC1 1H  
 P1 15.07 usec  
 PL1 0.00 dB  
 SFO1 400.1324710 MHz

F2 - Processing parameters  
 SI 65536  
 SF 400.1300086 MHz  
 WDW no  
 SSB 0  
 LB 0.00 Hz  
 GB 0  
 PC 1.00

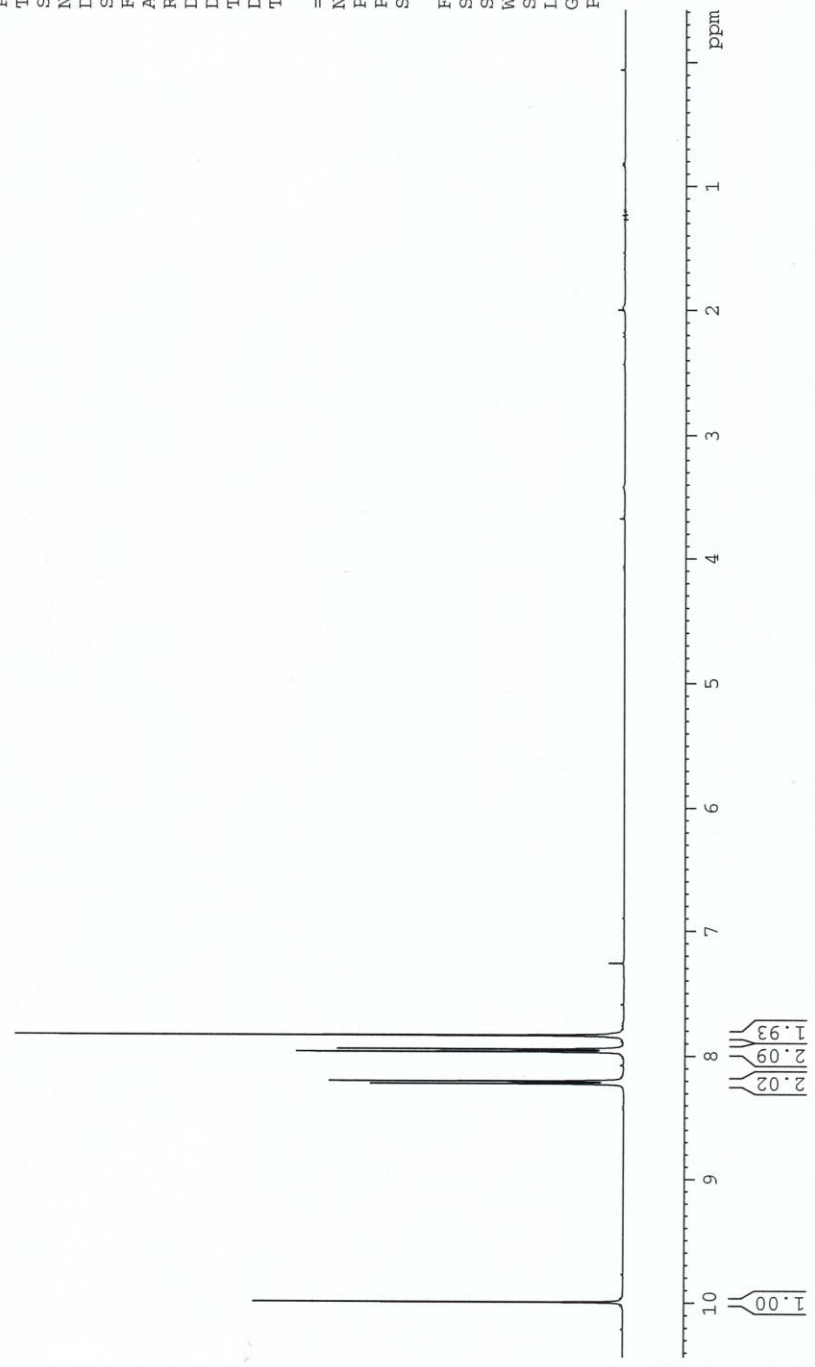

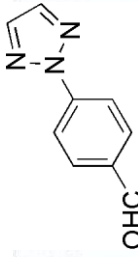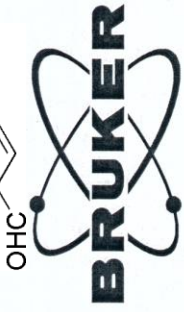

Current Data Parameters  
 NAME SUI-149C  
 EXPNO 2  
 PROCNO 2

F2 - Acquisition Parameters  
 Date\_ 20101005  
 Time 9.08  
 INSTRUM spect  
 PROBHD 5 mm BBO BB-1H  
 PULPROG zgpg30  
 TD 65536  
 SOLVENT CDCl3  
 NS 128  
 DS 2  
 SWH 23980.814 Hz  
 FIDRES 0.365918 Hz  
 AQ 1.3664756 sec  
 RG 8192  
 DW 20.850 usec  
 DE 6.00 usec  
 TE 296.2 K  
 D1 2.00000000 sec  
 d11 0.03000000 sec  
 DELTA 1.89999998 sec  
 TD0 1

==== CHANNEL f1 =====  
 NUC1 13C  
 P1 8.75 usec  
 PL1 -3.00 dB  
 SFO1 100.6228298 MHz

==== CHANNEL f2 =====  
 CPDPRG2 waltz16  
 NUC2 1H  
 PCPD2 90.00 usec  
 PL2 -1.00 dB  
 PL12 14.52 dB  
 PL13 18.00 dB  
 SFO2 400.1316005 MHz

F2 - Processing parameters  
 SI 65536  
 SF 100.6127576 MHz  
 WDW no  
 SSB 0  
 LB 0  
 GB 0  
 PC 1.40

191.06  
 143.70  
 136.72  
 135.12  
 131.16  
 119.17

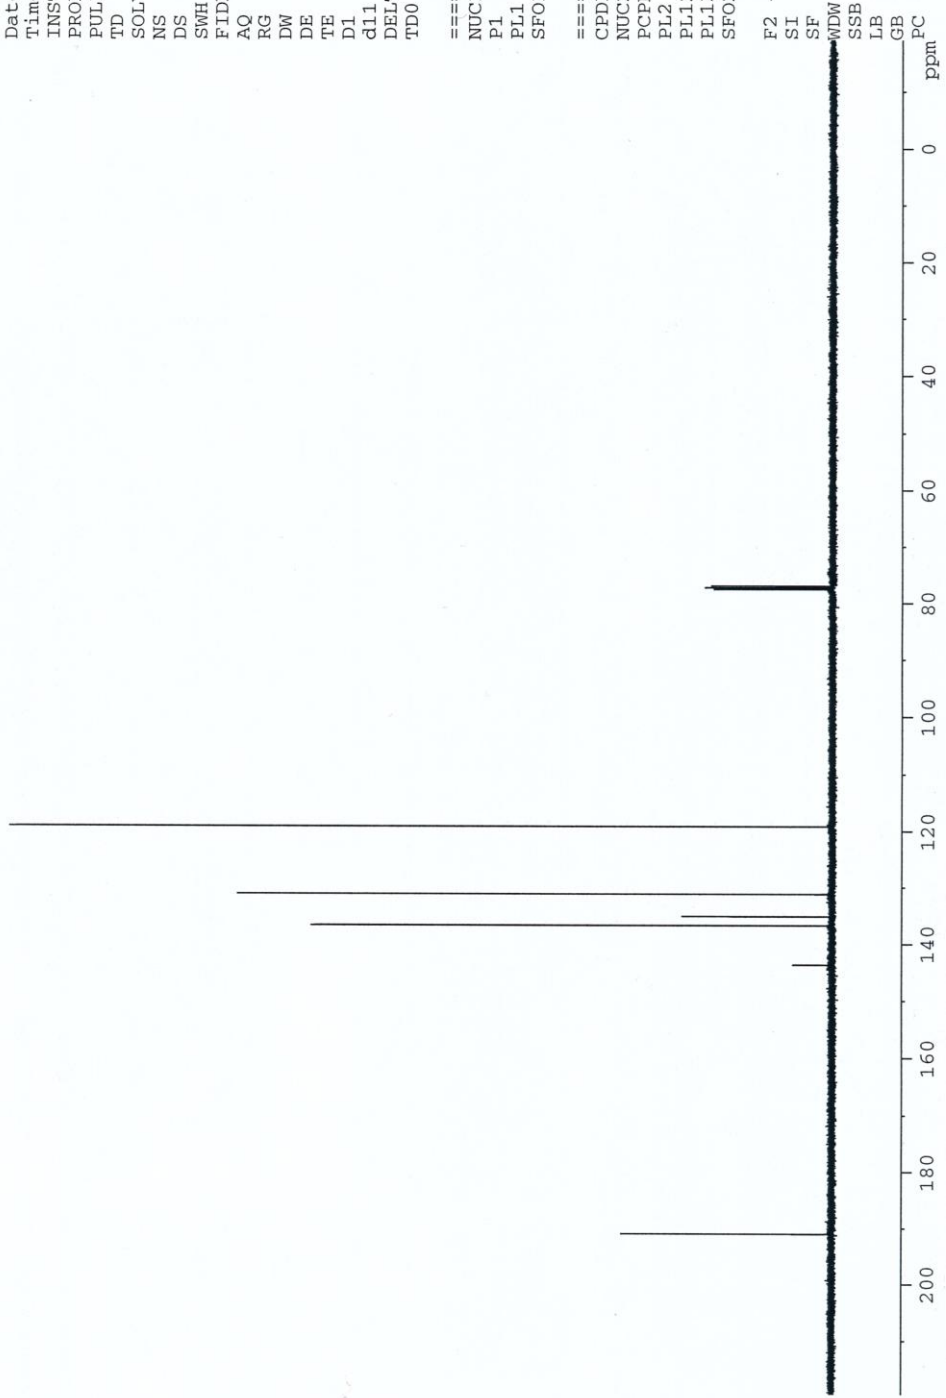

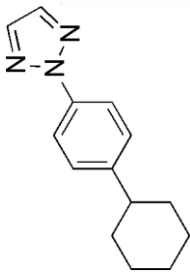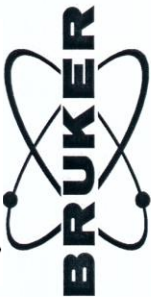

Current Data Parameters  
 NAME SU1-107-9  
 EXPNO 1  
 PROCNO 1

F2 - Acquisition Parameters  
 Date\_ 20100831  
 Time 9.33  
 INSTRUM spect  
 PROBHD 5 mm QNP 1H/13  
 PULPROG zg30  
 TD 65536  
 SOLVENT CDCl3  
 NS 8  
 DS 2  
 SWH 8278.146 Hz  
 FIDRES 0.126314 Hz  
 AQ 3.9584243 sec  
 RG 28.5  
 DW 60.400 usec  
 DE 6.00 usec  
 TE 295.2 K  
 D1 1.0000000 sec  
 TDO 1

==== CHANNEL f1 =====  
 NUC1 1H  
 P1 14.00 usec  
 PL1 0.00 dB  
 SFO1 400.1324710 MHz

F2 - Processing parameters  
 SI 65536  
 SF 400.1300093 MHz  
 WDW no  
 SSB 0  
 LB 0.00 Hz  
 GB 0  
 PC 1.00

2.568  
 2.556  
 2.548  
 2.540  
 1.888  
 1.867  
 1.744  
 1.488  
 1.458  
 1.282  
 1.274  
 1.252  
 1.243

8.020  
 7.998  
 7.776  
 7.322  
 7.301

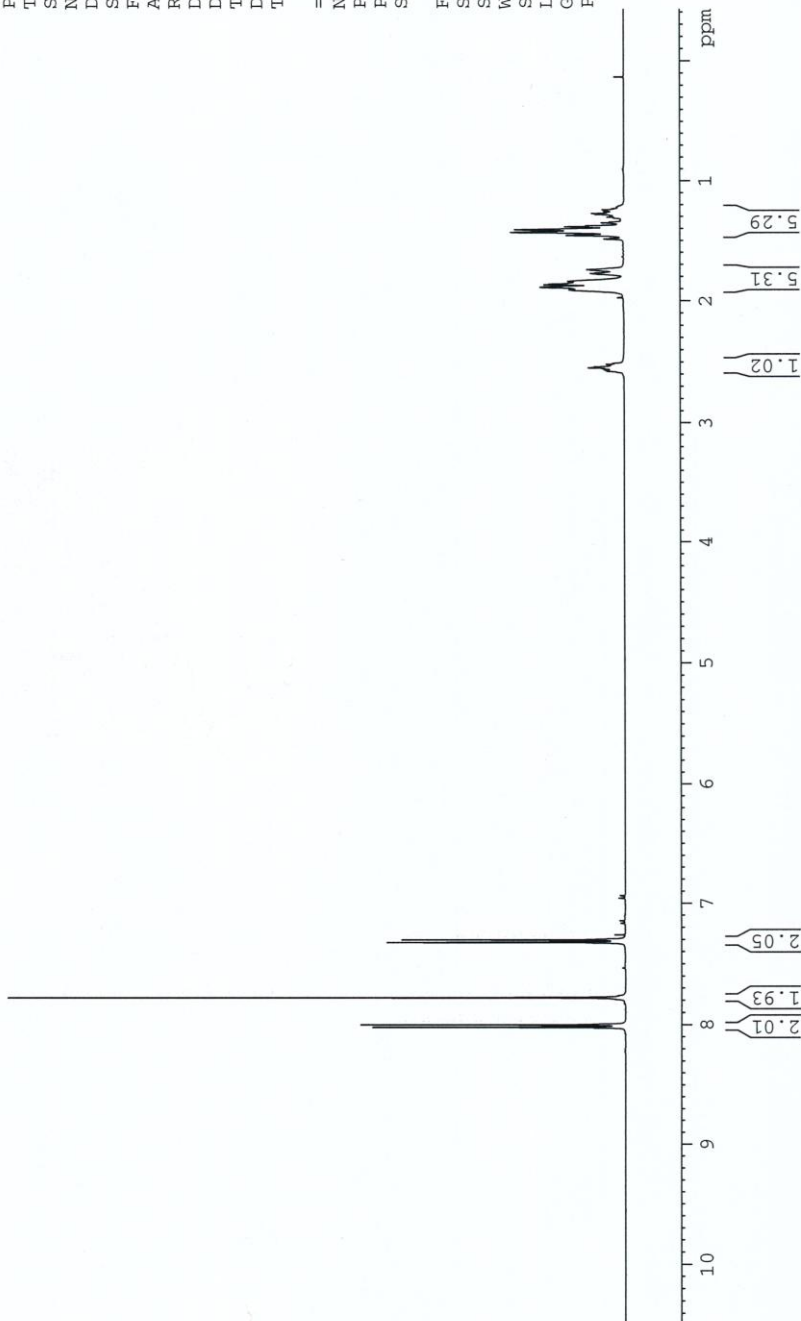



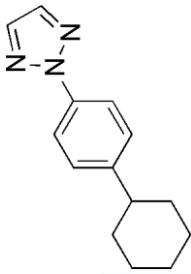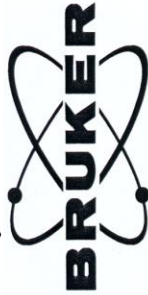

SU1-107-9C

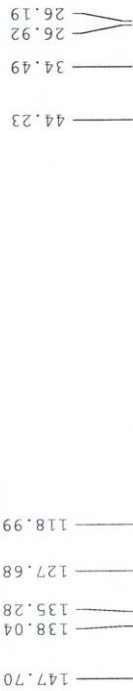

Current Data Parameters  
 NAME SU1-107-9C  
 EXPNO 1  
 PROCNO 1

F2 - Acquisition Parameters  
 Date\_ 20100831  
 Time\_ 9.41  
 INSTRUM spect  
 PROBD 5 mm QNP 1H/13  
 PULPROG zgpg30  
 TD 65336  
 SOLVENT CDC13  
 NS 128  
 DS 4  
 SWH 23980.814 Hz  
 FIDRES 0.365918 Hz  
 AQ 1.3664756 sec  
 RG 5160.6  
 DW 20.850 usec  
 DE 6.00 usec  
 TE 296.2 K  
 D1 2.0000000 sec  
 d11 0.0300000 sec  
 DELTA 1.89999998 sec  
 TDO 1

==== CHANNEL f1 =====  
 NUC1 13C  
 P1 9.38 usec  
 PL1 0.00 dB  
 SFO1 100.6228298 MHz

==== CHANNEL f2 =====  
 CPDPRG2 waltz16  
 NUC2 1H  
 PCPD2 90.00 usec  
 PL2 0.00 dB  
 PL12 16.10 dB  
 PL13 19.00 dB  
 SFO2 400.1316005 MHz

F2 - Processing parameters  
 SI 32768  
 SF 100.6127617 MHz  
 WDW no  
 SSB 0  
 LB 0.00 Hz  
 GB 0  
 PC 1.40

200 180 160 140 120 100 80 60 40 20 0 ppm

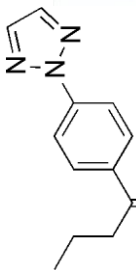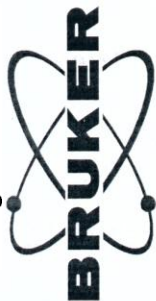

Current Data Parameters  
 NAME SUI-111-5  
 EXPNO 1  
 PROCNO 1

F2 - Acquisition Parameters  
 Date\_ 20110107  
 Time 9.35  
 INSTRUM spect  
 PROBHD 5 mm QNP 1H/13  
 PULPROG zg30  
 TD 65536  
 SOLVENT CDCl3  
 NS 8  
 DS 2  
 SWH 8278.146 Hz  
 FIDRES 0.126314 Hz  
 AQ 3.9584243 sec  
 RG 57  
 DW 60.400 usec  
 DE 6.00 usec  
 TE 295.2 K  
 D1 1.00000000 sec  
 TD0 1

==== CHANNEL f1 =====  
 NUC1 1H  
 P1 14.00 usec  
 PL1 0.00 dB  
 SFO1 400.1324710 MHz

F2 - Processing parameters  
 SI 65536  
 SF 400.1300091 MHz  
 WDW no  
 SSB 0  
 LB 0.00 Hz  
 GB 0  
 PC 1.00

0.925  
0.938  
0.956  
0.975  
1.678  
1.696  
1.715  
1.733  
1.752  
1.770  
2.857  
2.878  
2.896  
2.914

7.784  
7.994  
8.017  
8.084  
8.107

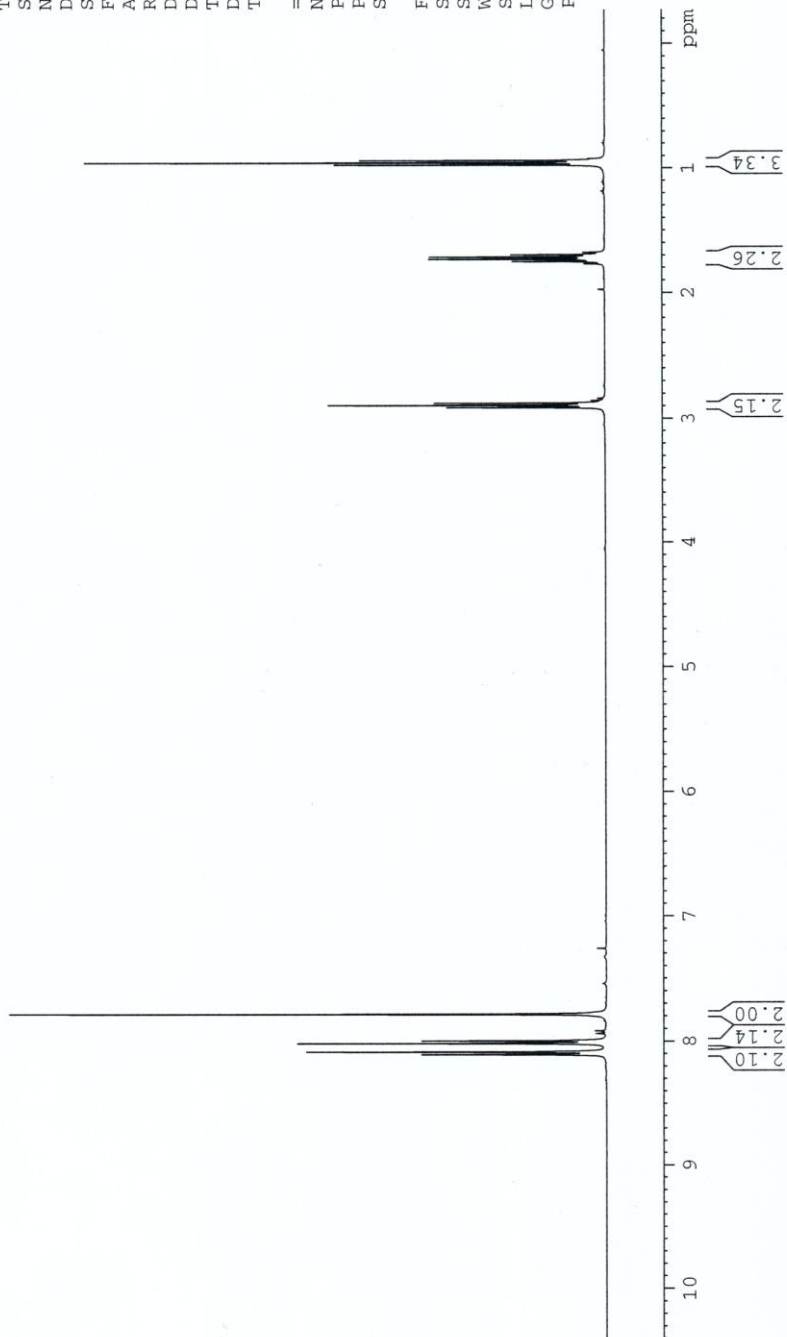

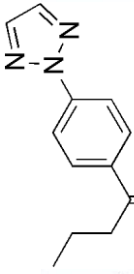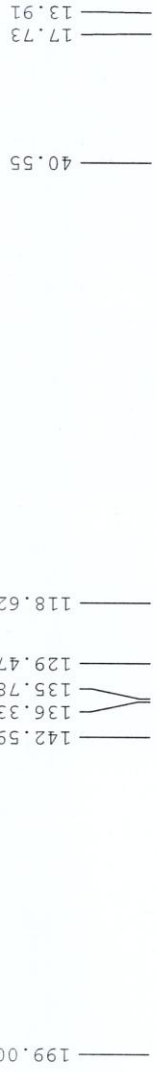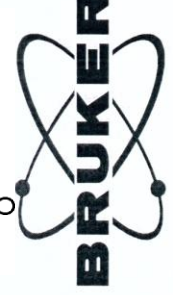

Current Data Parameters  
 NAME SU1-111-5C  
 EXPNO 1  
 PROCNO 1

F2 - Acquisition Parameters  
 Date\_ 20110107  
 Time 9.43  
 INSTRUM spect  
 PROBHD 5 mm QNP 1H/13  
 PULPROG zgpg30  
 TD 65536  
 SOLVENT CDCl3  
 NS 128  
 DS 4  
 SWH 23980.814 Hz  
 FIDRES 0.365918 Hz  
 AQ 1.3664756 sec  
 RG 1625.5  
 DW 20.850 usec  
 DE 6.00 usec  
 TE 296.2 K  
 D1 2.0000000 sec  
 d11 0.0300000 sec  
 DELTA 1.89999998 sec  
 TD0 1

==== CHANNEL f1 =====  
 NUC1 13C  
 P1 9.38 usec  
 PL1 0.00 dB  
 SFO1 100.6228298 MHz

==== CHANNEL f2 =====  
 CPDPRG2 waltz16  
 NUC2 1H  
 PCPD2 90.00 usec  
 PL2 0.00 dB  
 PL12 16.10 dB  
 PL13 19.00 dB  
 SFO2 400.1316005 MHz

F2 - Processing parameters  
 SI 32768  
 SF 100.6127618 MHz  
 WDW no  
 SSB 0  
 LB 0.00 Hz  
 GB 0  
 PC 1.40



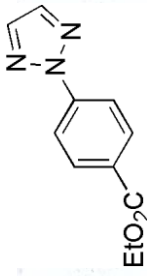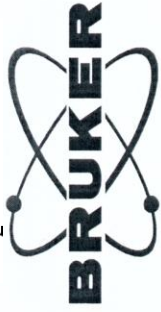

Current Data Parameters  
 NAME SUI-198-12  
 EXPNO 3  
 PROCNO 3

F2 - Acquisition Parameters  
 Date\_ 20110113  
 Time 12.59  
 INSTRUM spect  
 PROBHD 5 mm QNP 1H/13  
 PULPROG zg30  
 TD 65536  
 SOLVENT CDCl3  
 NS 8  
 DS 2  
 SWH 8278.146 Hz  
 FIDRES 0.126314 Hz  
 AQ 3.9584243 sec  
 RG 57  
 DW 60.400 usec  
 DE 6.00 usec  
 TE 295.2 K  
 D1 1.00000000 sec  
 TD0 1

==== CHANNEL f1 =====  
 NUC1 1H  
 P1 14.00 usec  
 PL1 0.00 dB  
 SFO1 400.1324710 MHz

F2 - Processing parameters  
 SI 65536  
 SF 400.1300093 MHz  
 WDW no  
 SSB 0  
 LB 0.00 Hz  
 GB 0  
 PC 1.00

1.369  
1.351  
1.333

4.367  
4.349  
4.331  
4.313

8.093  
7.776

3.15

2.16

1.95

4.00

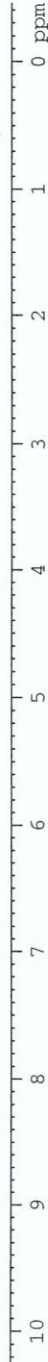

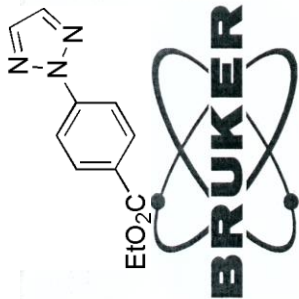

Current Data Parameters  
 NAME SU1-198-12C  
 EXPNO 3  
 PROCNO 3

F2 - Acquisition Parameters  
 Date\_ 20110113  
 Time 13.09  
 INSTRUM spect  
 PROBHD 5 mm QNP 1H/13  
 PULPROG zgpg30  
 TD 65536  
 SOLVENT CDCl<sub>3</sub>  
 NS 128  
 DS 4  
 SWH 23980.814 Hz  
 FIDRES 0.365918 Hz  
 AQ 1.3664756 sec  
 RG 5792.6  
 DW 20.850 usec  
 DE 6.00 usec  
 TE 296.2 K  
 D1 2.0000000 sec  
 d11 0.0300000 sec  
 DELTA 1.89999998 sec  
 TD0 1

==== CHANNEL f1 =====  
 NUC1 13C  
 P1 9.38 usec  
 PL1 0.00 dB  
 SFO1 100.6228298 MHz

==== CHANNEL f2 =====  
 CPDPRG2 waltz16  
 NUC2 1H  
 PCPD2 90.00 usec  
 PL2 0.00 dB  
 PL12 16.10 dB  
 PL13 19.00 dB  
 SFO2 400.1316005 MHz

F2 - Processing parameters  
 SI 32768  
 SF 100.6127597 MHz  
 WDW no  
 SSB 0  
 LB 0.00 Hz  
 GB 0  
 PC 1.40

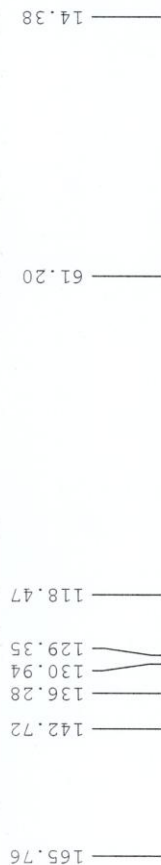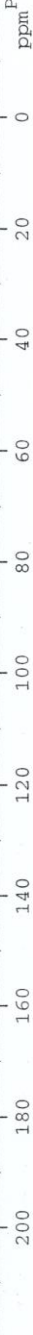

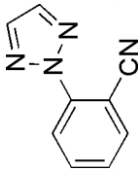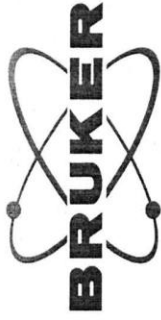

Current Data Parameters  
 NAME SU2-115  
 EXPNO 1  
 PROCNO 1

F2 - Acquisition Parameters  
 Date\_ 20110603  
 Time 8.54  
 INSTRUM spect  
 PROBHD 5 mm BBO BB-1H  
 PULPROG zg30  
 TD 65536  
 SOLVENT CDC13  
 NS 16  
 DS 2  
 SWH 8278.146 Hz  
 FIDRES 0.126314 Hz  
 AQ 3.9584243 sec  
 RG 57  
 DW 60.400 usec  
 DE 6.00 usec  
 TE 297.2 K  
 D1 1.0000000 sec  
 TD0 1

==== CHANNEL f1 =====  
 NUC1 1H  
 P1 15.07 usec  
 PL1 0.00 dB  
 SFO1 400.1324710 MHz

F2 - Processing parameters  
 SI 65536  
 SF 400.1300080 MHz  
 WDW no  
 SSB 0  
 LB 0.00 Hz  
 GB 0  
 PC 1.00

7.823  
7.821  
7.821  
7.820  
7.805  
7.804  
7.803  
7.801  
7.801  
7.800  
7.729  
7.727  
7.727  
7.725  
7.712  
7.710  
7.708  
7.706  
7.704  
7.691  
7.689  
7.687  
7.685  
7.478  
7.476  
7.475  
7.473  
7.458  
7.457  
7.454  
7.438  
7.437  
7.435

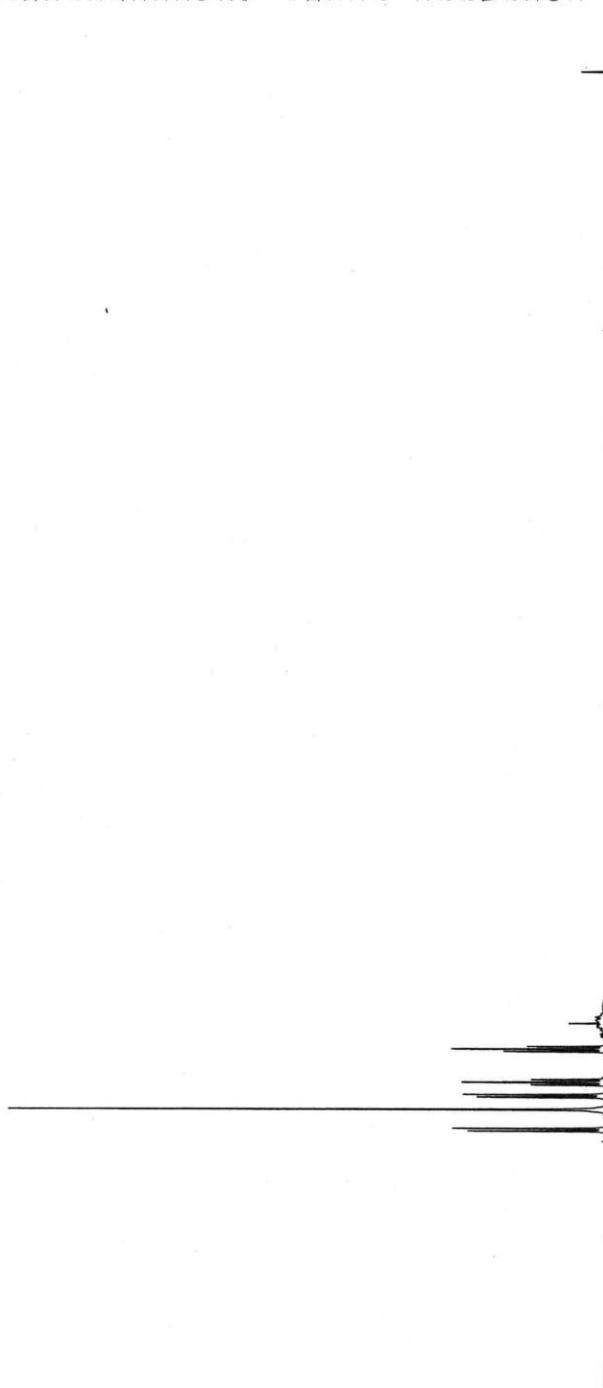

0 ppm  
1  
2  
3  
4  
5  
6  
7  
8  
9

1.00  
1.91  
0.99  
1.04  
1.04

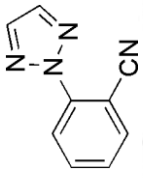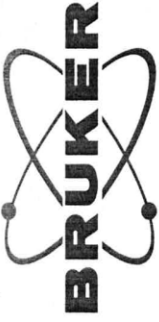

Current Data Parameters  
 NAME SU2-115C  
 EXPNO 1  
 PROCNO 1

F2 - Acquisition Parameters  
 Date\_ 20110603  
 Time 9.02  
 INSTRUM spect  
 PROBHD 5 mm BBO BB-1H  
 PULPROG zgpg30  
 TD 65536  
 SOLVENT CDCl3  
 NS 128  
 DS 2  
 SWH 23980.814 Hz  
 FIDRES 0.365918 Hz  
 AQ 1.3664756 sec  
 RG 16384  
 DW 20.850 usec  
 DE 6.00 usec  
 TE 297.2 K  
 D1 2.00000000 sec  
 d11 0.03000000 sec  
 DELTA 1.89999998 sec  
 TD0 1

==== CHANNEL f1 =====  
 NUC1 13C  
 P1 8.75 usec  
 PL1 -3.00 dB  
 SFO1 100.6228298 MHz

==== CHANNEL f2 =====  
 CPDPRG2 waltz16  
 NUC2 1H  
 PCPD2 90.00 usec  
 PL2 -1.00 dB  
 PL12 14.52 dB  
 PL13 18.00 dB  
 SFO2 400.1316005 MHz

F2 - Processing parameters  
 SI 65536  
 SF 100.6127592 MHz  
 WDW no  
 SSB 0  
 LB 0.00 Hz  
 GB 0  
 PC 1.40

140.51  
 136.85  
 135.25  
 133.86  
 128.08  
 122.83  
 117.03  
 104.90

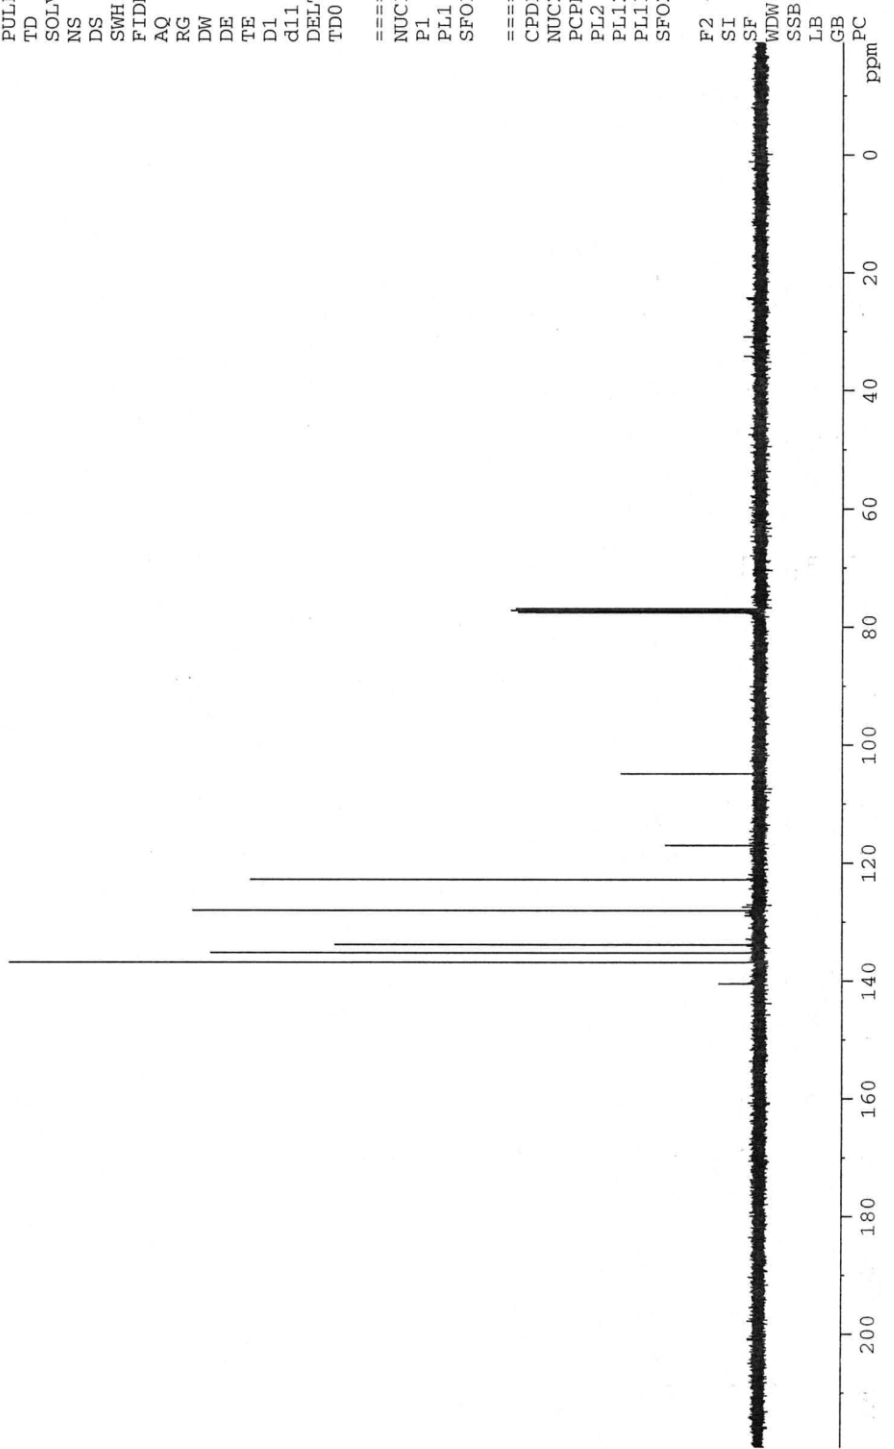

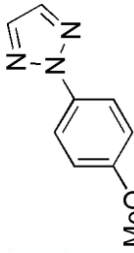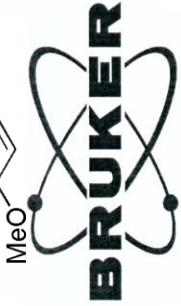

Current Data Parameters  
 NAME SU1-107-3  
 EXPNO 1  
 PROCNO 1

F2 - Acquisition Parameters  
 Date\_ 20110107  
 Time 10.13  
 INSTRUM spect  
 PROBHD 5 mm QNP 1H/13  
 PULPROG zg30  
 TD 65536  
 SOLVENT CDCl3  
 NS 8  
 DS 2  
 SWH 8278.146 Hz  
 FIDRES 0.126314 Hz  
 AQ 3.9584243 sec  
 RG 57  
 DW 60.400 usec  
 DE 6.00 usec  
 TE 296.2 K  
 D1 1.00000000 sec  
 TD0 1

==== CHANNEL f1 =====  
 NUC1 1H  
 P1 14.00 usec  
 PL1 0.00 dB  
 SF01 400.1324710 MHz

F2 - Processing parameters  
 SI 65536  
 SF 400.1300093 MHz  
 WDW no  
 SSB 0  
 LB 0.00 Hz  
 GB 0  
 PC 1.00

7.989  
 7.966  
 7.750  
 6.958  
 3.814

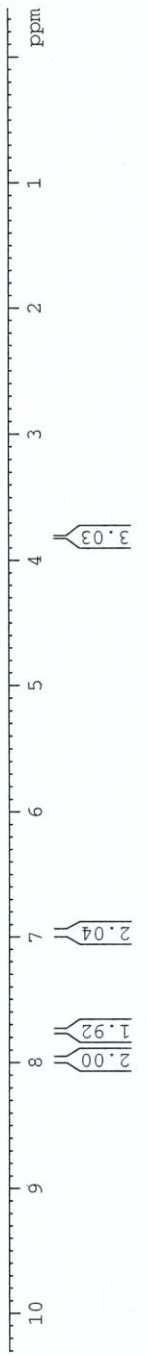

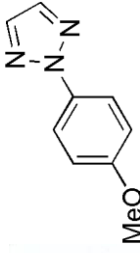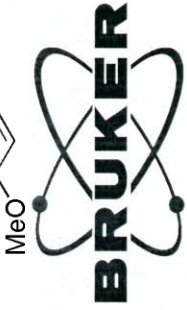

Current Data Parameters  
 NAME SUI-107-3C  
 EXNO 1  
 PROCNO 1

F2 - Acquisition Parameters  
 Date\_ 20110107  
 Time 10.21  
 INSTRUM spect  
 PROBHD 5 mm QNP 1H/13  
 PULPROG zgpg30  
 TD 65536  
 SOLVENT CDCl3  
 NS 128  
 DS 4  
 SWH 23980.814 Hz  
 FIDRES 0.365918 Hz  
 AQ 1.3664756 sec  
 RG 5160.6  
 DW 20.850 usec  
 DE 6.00 usec  
 TE 296.2 K  
 D1 2.00000000 sec  
 d11 0.03000000 sec  
 DELTA 1.89999998 sec  
 TD0 1

==== CHANNEL f1 =====  
 NUC1 13C  
 P1 9.38 usec  
 PL1 0.00 dB  
 SF01 100.6228298 MHz

==== CHANNEL f2 =====  
 CPDPRG2 waltz16  
 NUC2 1H  
 PCPD2 90.00 usec  
 PL2 0.00 dB  
 PL12 16.10 dB  
 PL13 19.00 dB  
 SF02 400.1316005 MHz

F2 - Processing parameters  
 SI 32768  
 SF 100.6127568 MHz  
 WDW no  
 SSB 0  
 LB 0.00 Hz  
 GB 0  
 PC 1.40

159.13  
 135.16  
 133.88  
 120.51  
 114.46  
 55.64

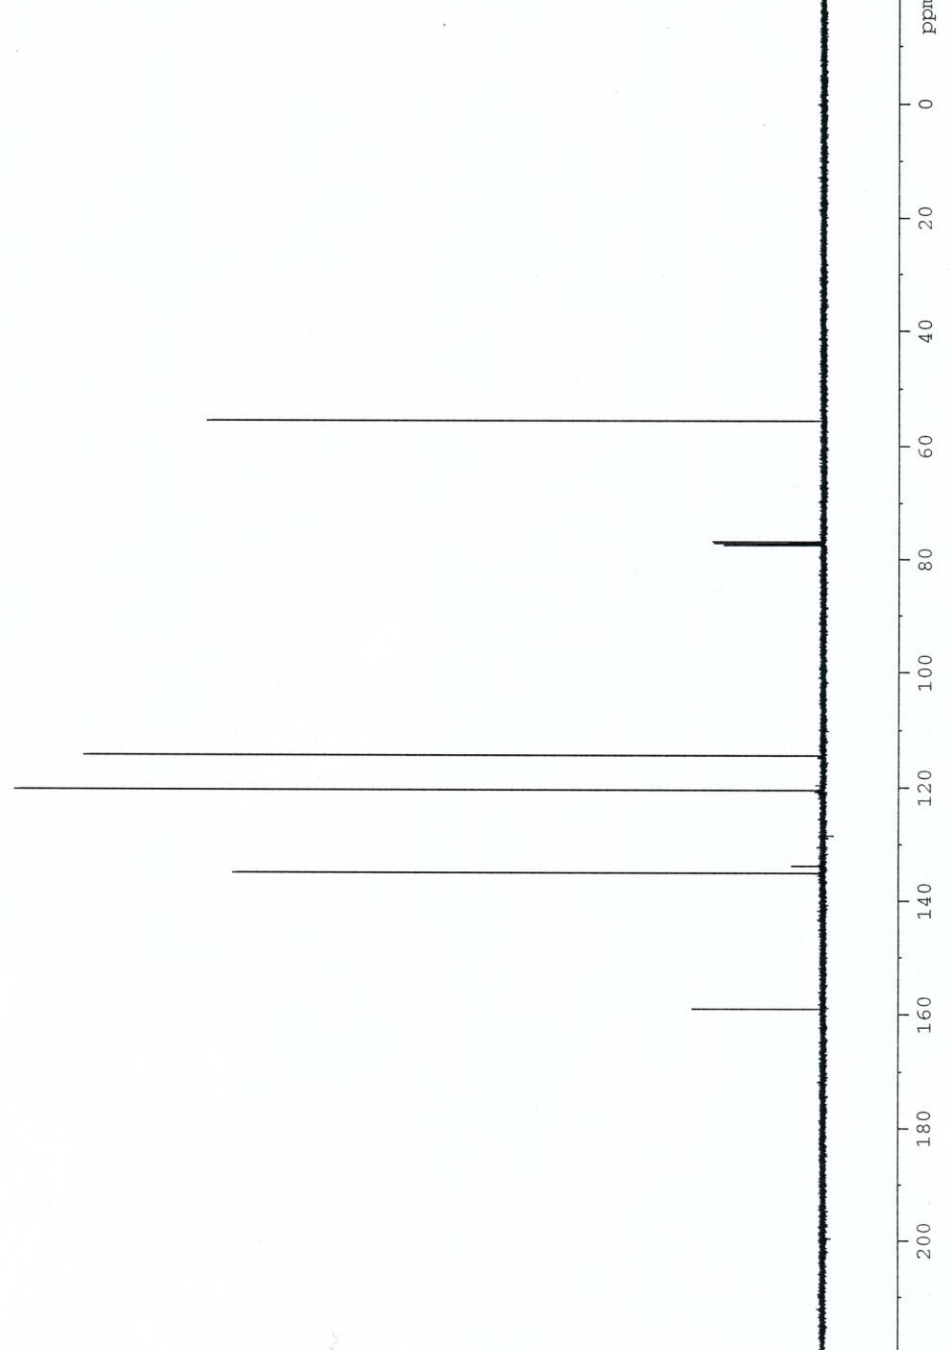

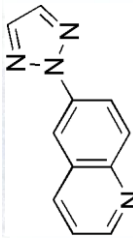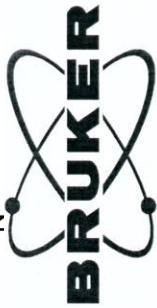

Current Data Parameters  
 NAME SU1-38-37  
 EXPNO 2  
 PROCNO 2

F2 - Acquisition Parameters  
 Date\_ 20110107  
 Time 10.00  
 INSTRUM spect  
 PROBHD 5 mm QNP 1H/13  
 PULPROG zg30  
 TD 65536  
 SOLVENT CDCl3  
 NS 16  
 DS 2  
 SWH 8278.146 Hz  
 FIDRES 0.126314 Hz  
 AQ 3.9584243 sec  
 RG 90.5  
 DW 60.400 usec  
 DE 6.00 usec  
 TE 295.2 K  
 D1 1.00000000 sec  
 TD0 1

==== CHANNEL f1 =====  
 NUC1 1H  
 P1 14.00 usec  
 PL1 0.00 dB  
 SFO1 400.1324710 MHz

F2 - Processing parameters  
 SI 65536  
 SF 400.1300102 MHz  
 WDW no  
 SSB 0  
 LB 0.00 Hz  
 GB 0  
 PC 1.00

8.867  
 8.443  
 8.421  
 8.400  
 8.184  
 8.156  
 8.133  
 7.804  
 7.370  
 7.365  
 7.361

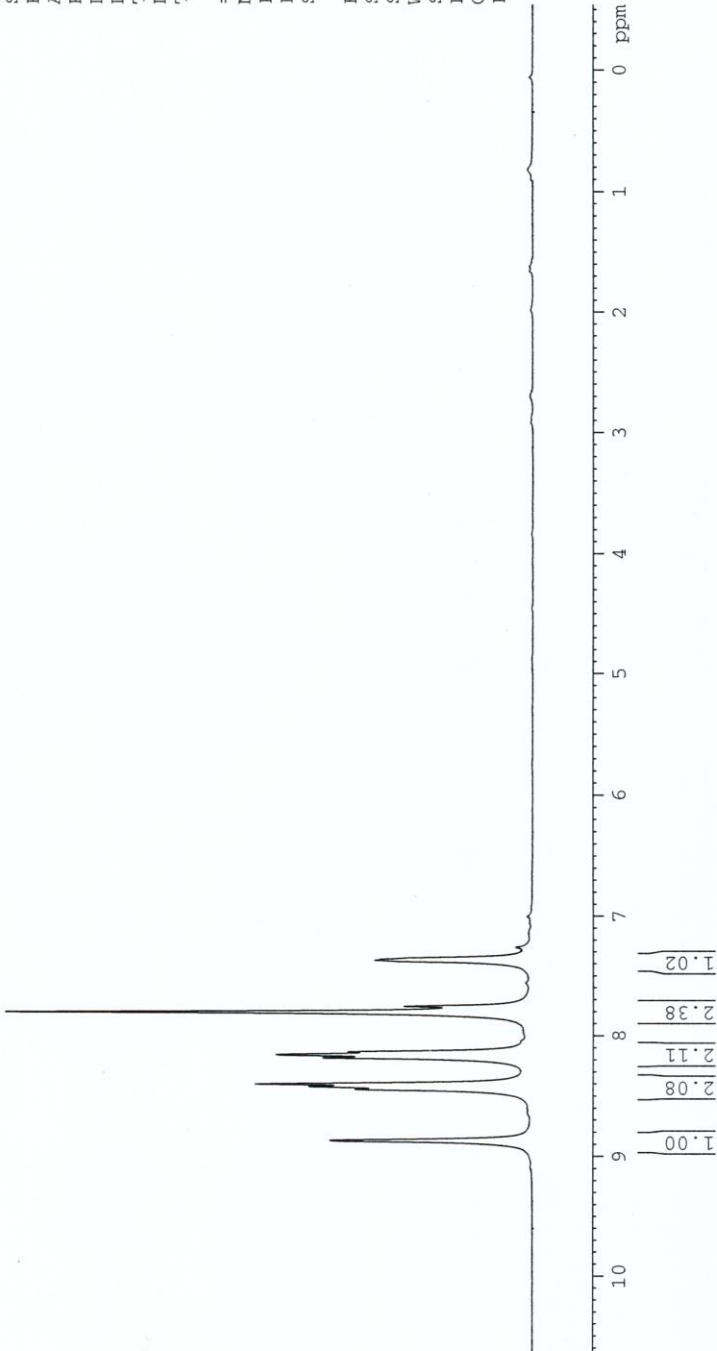



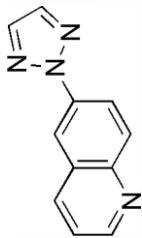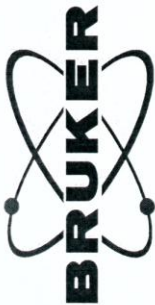

Current Data Parameters  
 NAME SU1-38-37C  
 EXPNO 2  
 PROCNO 2

F2 - Acquisition Parameters  
 Date\_ 20110107  
 Time 10.09  
 INSTRUM spect  
 PROBHD 5 mm QNP 1H/13  
 PULPROG zgpg30  
 TD 65536  
 SOLVENT CDC13  
 NS 128  
 DS 4  
 SWH 23980.814 Hz  
 FIDRES 0.365918 Hz  
 AQ 1.3664756 sec  
 RG 1625.5  
 DW 20.850 usec  
 DE 6.00 usec  
 TE 296.2 K  
 D1 2.0000000 sec  
 d11 0.0300000 sec  
 DELTA 1.89999998 sec  
 TDO 1

==== CHANNEL f1 =====  
 NUC1 13C  
 P1 9.38 usec  
 PL1 0.00 dB  
 SFO1 100.6228298 MHz

==== CHANNEL f2 =====  
 CPDPRG2 waltz16  
 NUC2 1H  
 PCPD2 90.00 usec  
 PL2 0.00 dB  
 PL12 16.10 dB  
 PL13 19.00 dB  
 SFO2 400.1316005 MHz

F2 - Processing parameters  
 SI 32768  
 SF 100.6127588 MHz  
 WDW no  
 SSB 0  
 LB 0.00 Hz  
 GB 0  
 PC 1.40

150.65  
 147.19  
 137.55  
 136.54  
 136.11  
 130.90  
 128.35  
 122.14  
 121.53  
 116.21

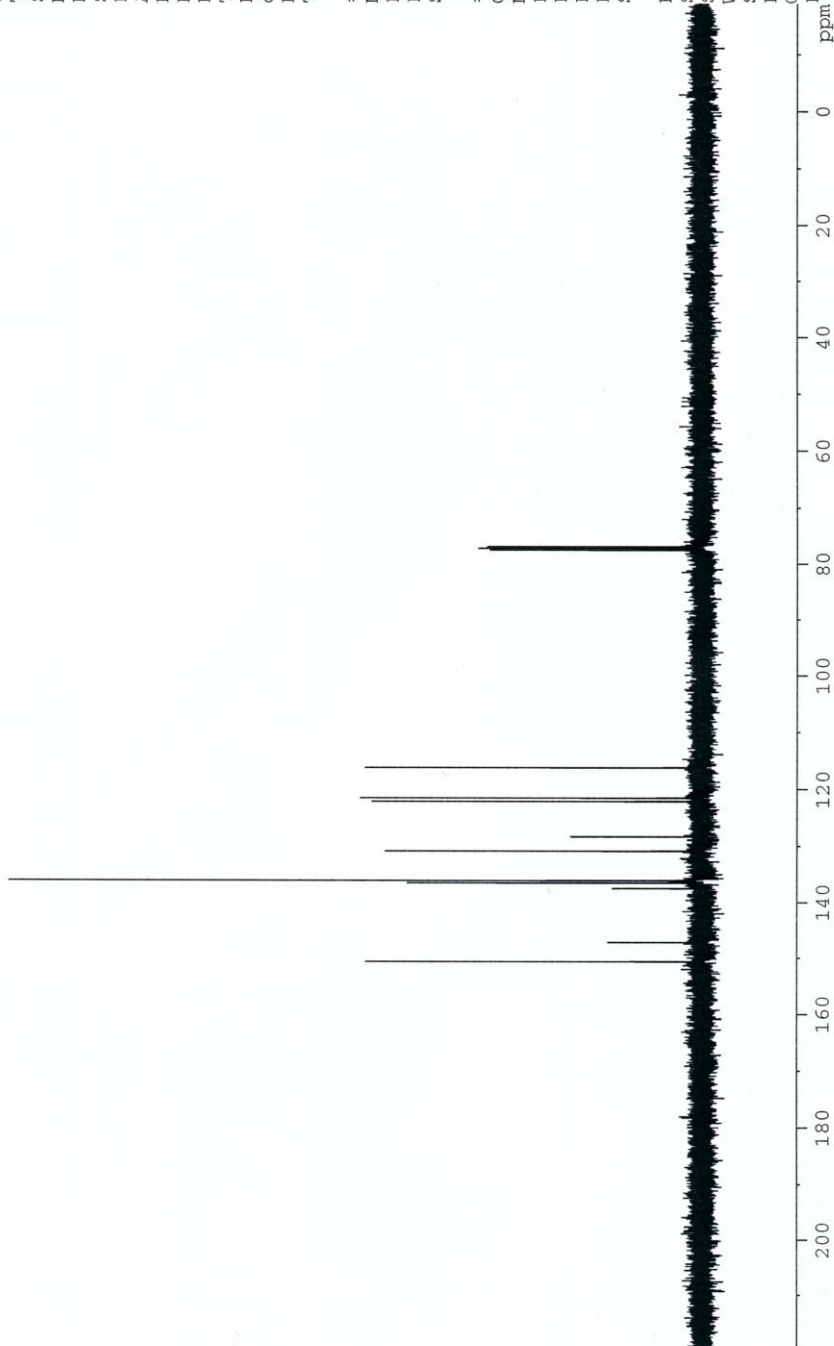



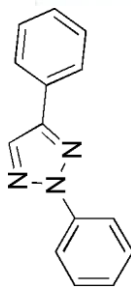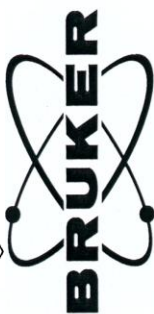

Current Data Parameters  
 NAME SU1-171  
 EXPNO 1  
 PROCNO 1

F2 - Acquisition Parameters  
 Date\_ 20101115  
 Time 11.22  
 INSTRUM spect  
 PROBHD 5 mm QNP 1H/13  
 PULPROG zg30  
 TD 65536  
 SOLVENT CDC13  
 NS 8  
 DS 2  
 SWH 8278.146 Hz  
 FIDRES 0.126314 Hz  
 AQ 3.9584243 sec  
 RG 57  
 DW 60.400 usec  
 DE 6.00 usec  
 TE 295.2 K  
 D1 1.00000000 sec  
 TD0 1

==== CHANNEL f1 =====  
 NUC1 1H  
 P1 14.00 usec  
 PL1 0.00 GB  
 SFO1 400.1324710 MHz

F2 - Processing parameters  
 SI 65536  
 SF 400.1300096 MHz  
 WDW no  
 SSB 0  
 LB 0.00 Hz  
 GB 0  
 PC 1.00

8.235  
 8.216  
 8.089  
 7.966  
 7.948  
 7.552  
 7.532  
 7.509  
 7.489  
 7.488  
 7.449  
 7.448  
 7.430  
 7.403  
 7.384  
 7.366  
 7.364

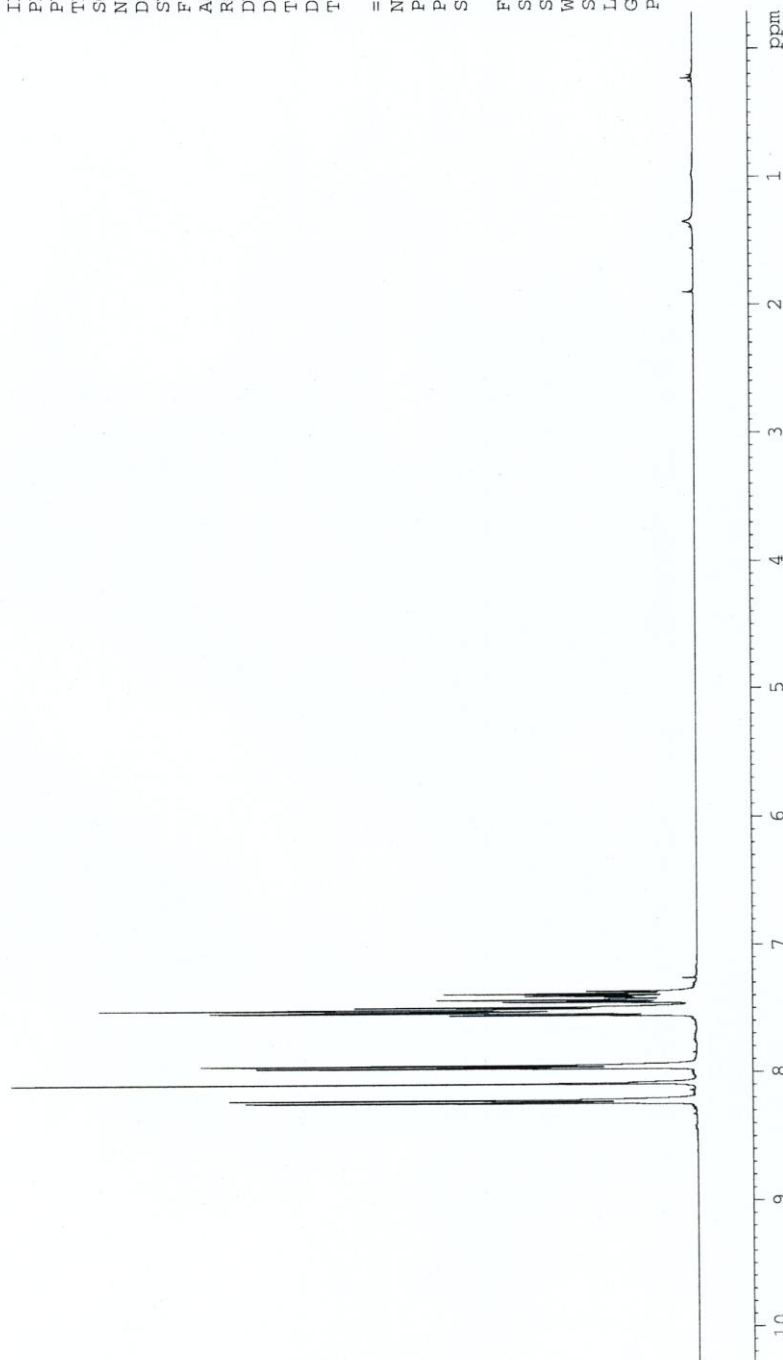

2.06  
 1.00  
 2.10  
 4.29  
 2.13

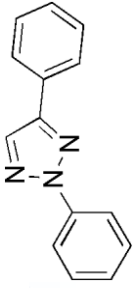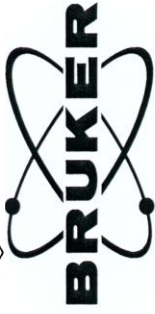

Current Data Parameters  
 NAME SU1-171C  
 EXPNO 1  
 PROCNO 1

F2 - Acquisition Parameters  
 Date\_ 20101115  
 Time 11.31  
 INSTRUM spect  
 PROBD 5 mm QNP 1H/13  
 PULPROG zgpg30  
 TD 65536  
 SOLVENT CDCl3  
 NS 128  
 DS 4  
 SWH 23980.814 Hz  
 FIDRES 0.365918 Hz  
 AQ 1.3664756 sec  
 RG 5160.6  
 DW 20.850 usec  
 DE 6.00 usec  
 TE 295.2 K  
 D1 2.00000000 sec  
 d11 0.03000000 sec  
 DELTA 1.89999998 sec  
 TDO 1

=====  
 CHANNEL f1 13C  
 P1 9.38 usec  
 PL1 0.00 dB  
 SFO1 100.6228298 MHz

=====  
 CHANNEL f2 waltz16  
 CPDPRG2 IH  
 NUC2 13C  
 PCPD2 90.00 usec  
 PL2 0.00 dB  
 PL12 16.10 dB  
 PL13 19.00 dB  
 SFO2 400.1316005 MHz

F2 - Processing parameters  
 SI 32768  
 SF 100.6127720 MHz  
 MDW no  
 SSB 0  
 LB 0.00 Hz  
 GB 0  
 PC 1.40

148.88  
 139.95  
 132.62  
 130.10  
 129.32  
 128.99  
 128.86  
 127.43  
 126.20  
 118.83

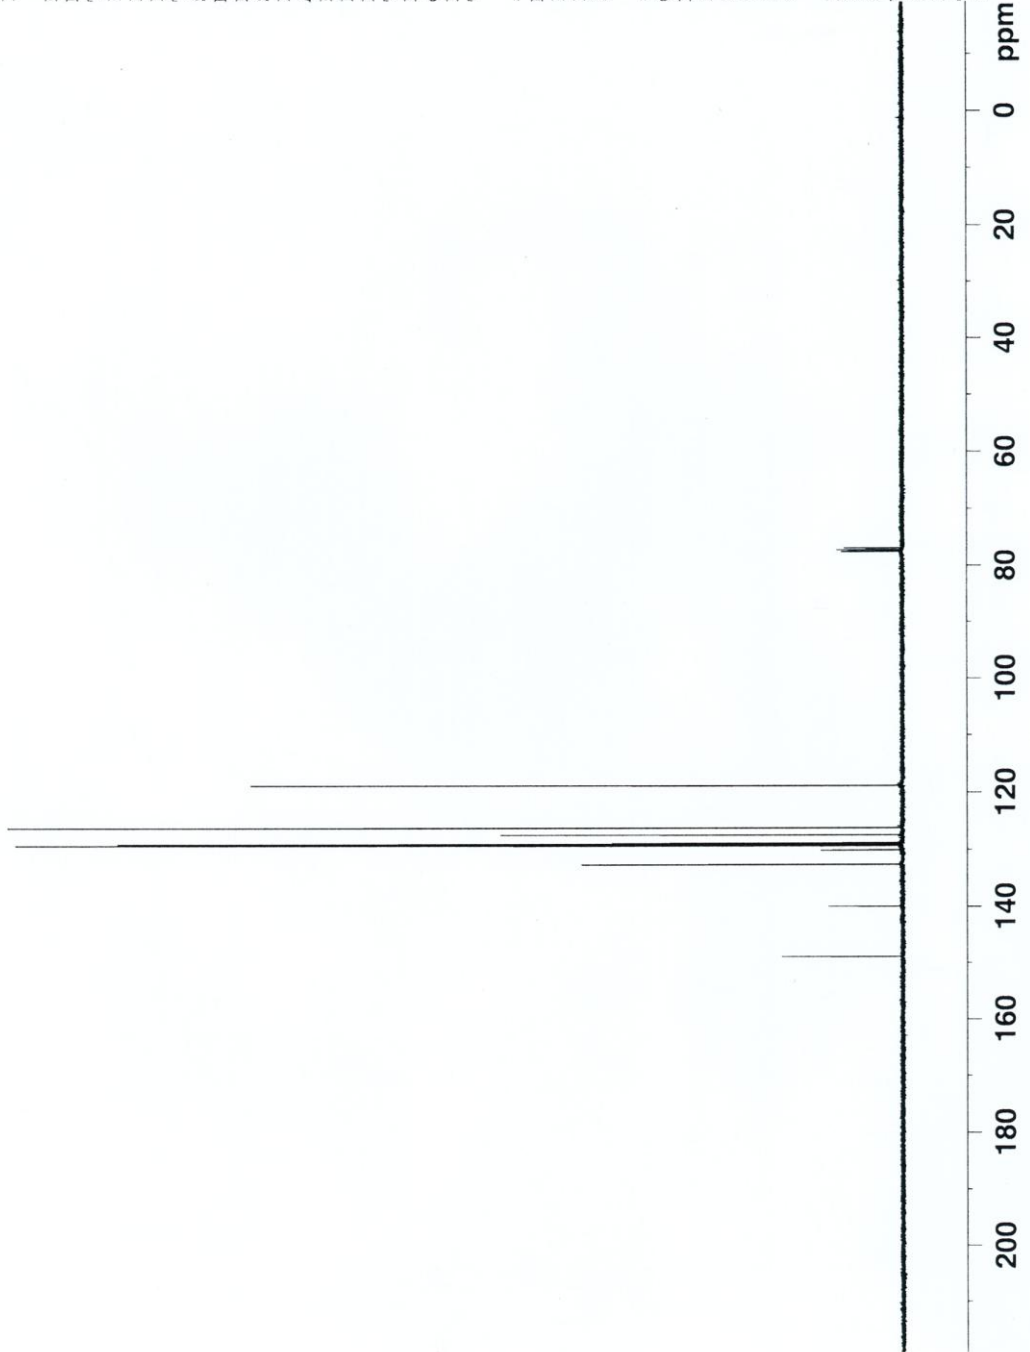

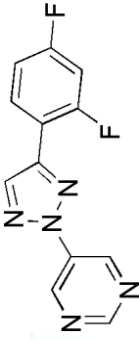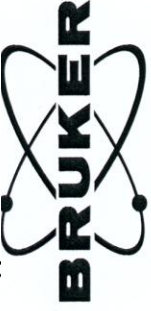

Current Data Parameters  
 NAME SU1-179-6  
 EXPNO 1  
 PROCNO 1

F2 - Acquisition Parameters  
 Date\_ 20101119  
 Time 9.03  
 INSTRUM spect  
 PROBHD 5 mm QNP 1H/13  
 PULPROG zg30  
 TD 65536  
 SOLVENT CDCl3  
 NS 16  
 DS 2  
 SWH 8278.146 Hz  
 FIDRES 0.126314 Hz  
 AQ 3.9584243 sec  
 RG 114  
 DW 60.400 usec  
 DE 6.00 usec  
 TE 295.2 K  
 D1 1.00000000 sec  
 TD0 1

==== CHANNEL f1 =====  
 NUC1 1H  
 P1 14.00 usec  
 PL1 0.00 dB  
 SFO1 400.1324710 MHz

F2 - Processing parameters  
 SI 65536  
 SF 400.1300098 MHz  
 WDW no  
 SSB 0  
 LB 0.00 Hz  
 GB 0  
 PC 1.00

9.415  
 9.171  
 8.161  
 8.151  
 8.065  
 8.044  
 8.027  
 8.006  
 6.984  
 6.964  
 6.947  
 6.943  
 6.928  
 6.900  
 6.878  
 6.873

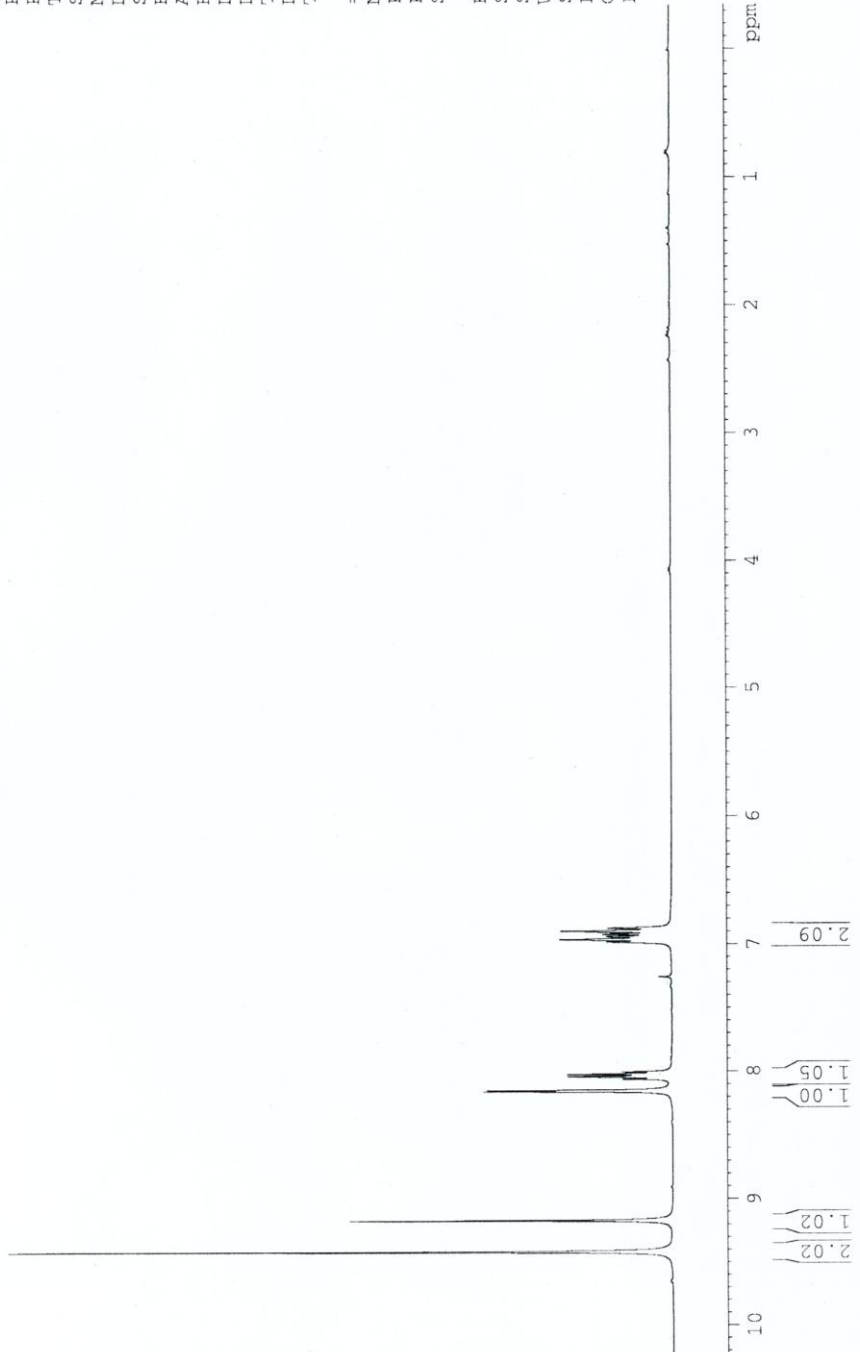

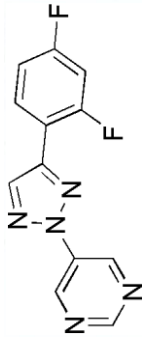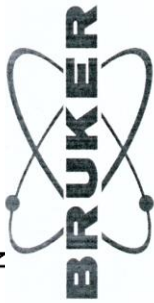

Current Data Parameters  
 NAME SUI-179-6C  
 EXPNO 1  
 PROCNO 1

F2 - Acquisition Parameters  
 Date\_ 20101119  
 Time\_ 9.18  
 INSTRUM spect  
 PROBHD 5 mm QNP 1H/13  
 PULPROG zgpg30  
 TD 65536  
 SOLVENT CDCl3  
 NS 256  
 DS 4  
 SWH 23980.814 Hz  
 FIDRES 0.365918 Hz  
 AQ 1.3664756 sec  
 RG 1625.5  
 DW 20.850 usec  
 DE 6.00 usec  
 TE 296.2 K  
 D1 2.0000000 sec  
 d11 0.0300000 sec  
 DELTA 1.8999999 sec  
 TD0 1

==== CHANNEL f1 =====  
 NUC1 13C  
 P1 9.38 usec  
 PL1 0.00 dB  
 SFO1 100.6228298 MHz

==== CHANNEL f2 =====  
 CPDPRG2 waltz16  
 NUC2 1H  
 PCPD2 90.00 usec  
 PL2 0.00 dB  
 PL12 16.10 dB  
 PL13 19.00 dB  
 SFO2 400.1316005 MHz

F2 - Processing parameters  
 SI 32768  
 SF 100.6127554 MHz  
 WDW no  
 SSB 0  
 LB 0.00 Hz  
 GB 0  
 PC 1.40

164.84  
 164.72  
 162.33  
 162.21  
 161.82  
 161.70  
 159.30  
 159.18  
 157.23  
 146.94  
 144.41  
 136.41  
 136.29  
 134.28  
 129.79  
 129.74  
 129.70  
 129.65  
 113.74  
 113.70  
 113.61  
 113.57  
 112.63  
 112.60  
 112.42  
 112.39  
 104.98  
 104.73  
 104.47

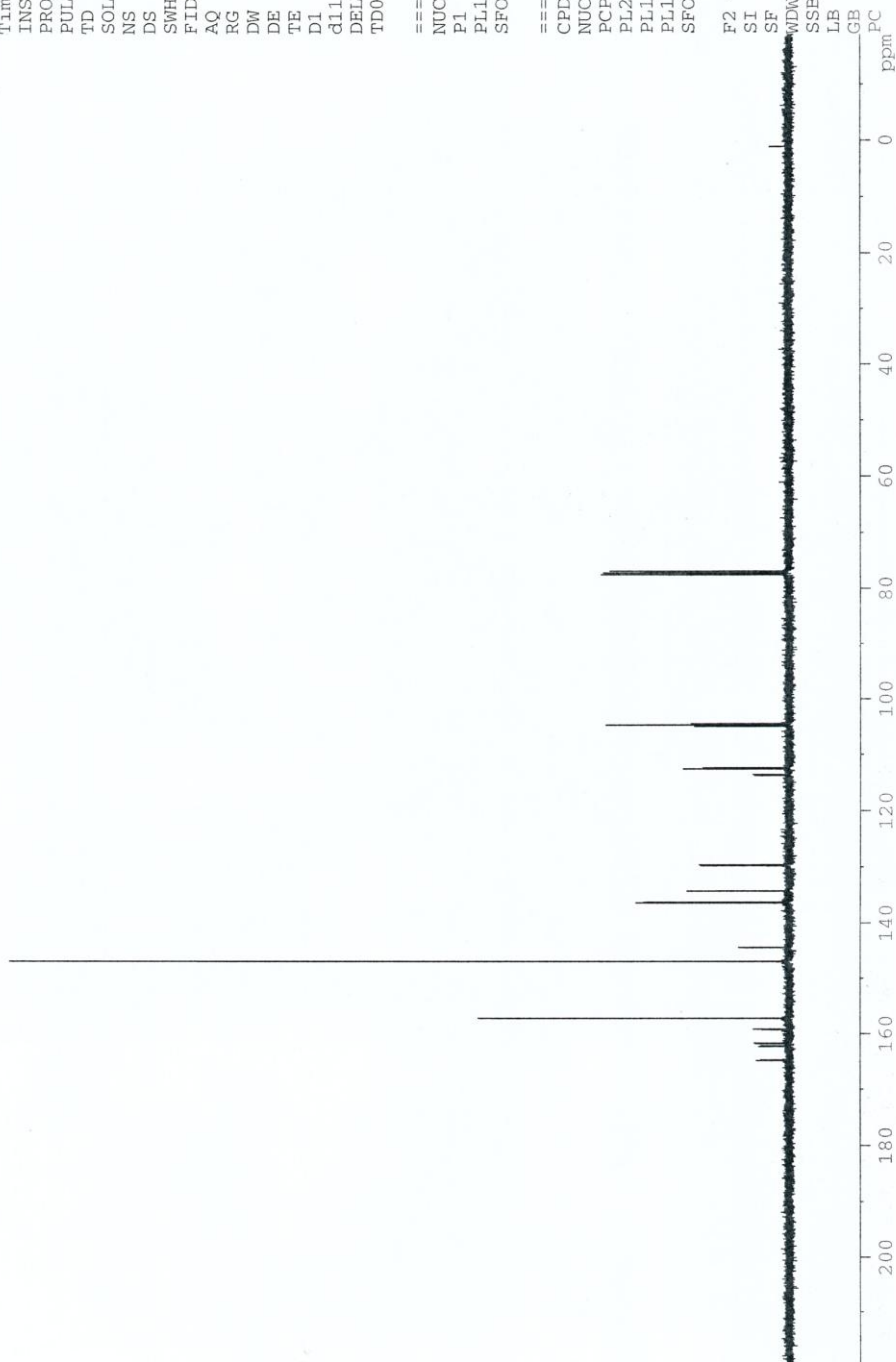

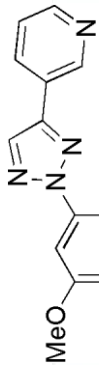

OMe

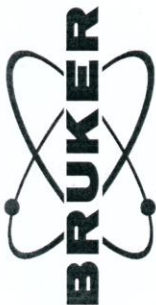

Current Data Parameters  
 NAME Su1-209  
 EXPNO 1  
 PROCNO 1

F2 - Acquisition Parameters  
 Date\_ 20101222  
 Time 11.44  
 INSTRUM spect  
 PROBHD 5 mm BBO BB-IH  
 PULPROG zg30  
 TD 65536  
 SOLVENT CDC13  
 NS 8  
 DS 2  
 SWH 8278.146 Hz  
 FIDRES 0.126314 Hz  
 AQ 3.9584243 sec  
 RG 40.3  
 DW 60.400 usec  
 DE 6.00 usec  
 TE 296.2 K  
 D1 1.00000000 sec  
 TD0 1

==== CHANNEL f1 =====  
 NUC1 1H  
 P1 15.07 usec  
 PL1 0.00 dB  
 SFO1 400.1324710 MHz

F2 - Processing parameters  
 SI 65536  
 SF 400.1300124 MHz  
 WDW no  
 SSB 0  
 LB 0.00 Hz  
 GB 0  
 PC 1.00

9.068  
9.059  
8.576  
8.565  
8.112  
8.098  
8.093  
8.027  
8.022  
8.020  
8.016  
8.008  
7.332  
7.321  
7.313  
7.261  
7.249  
7.243  
6.413  
6.408  
6.401  
6.395

3.819

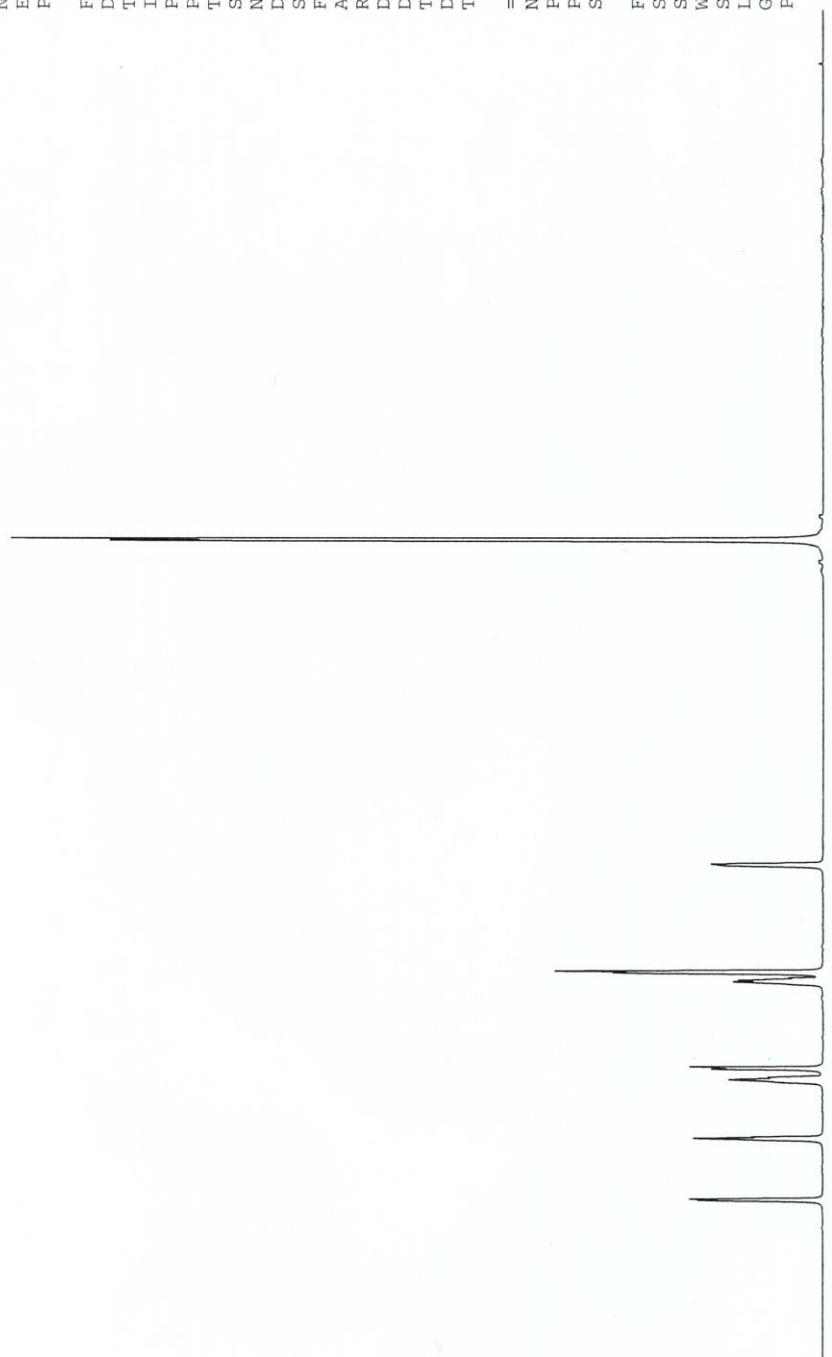

10  
9  
8  
7  
6  
5  
4  
3  
2  
1  
ppm

1.00  
1.01  
1.06  
1.02  
3.17  
1.01  
6.35

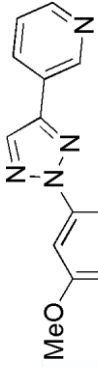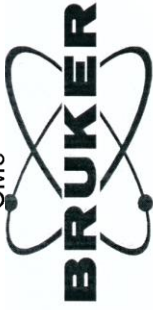

Current Data Parameters  
 NAME Sul-209C  
 EXPNO 1  
 PROCNO 1

F2 - Acquisition Parameters  
 Date\_ 20101222  
 Time 11.51  
 INSTRUM spect  
 PROBHD 5 mm BBO BB-1H  
 PULPROG zgpg30  
 TD 65536  
 SOLVENT CDC13  
 NS 128  
 DS 2  
 SWH 23980.814 Hz  
 FIDRES 0.365918 Hz  
 AQ 1.3664756 sec  
 RG 8192  
 DW 20.850 usec  
 DE 6.00 usec  
 TE 297.2 K  
 D1 2.0000000 sec  
 d11 0.0300000 sec  
 DELTA 1.89999998 sec  
 TD0 1

==== CHANNEL f1 =====  
 NUC1 13C  
 P1 8.75 usec  
 PL1 -3.00 dB  
 SF01 100.6228298 MHz  
 ===== CHANNEL f2 =====  
 CPDPRG2 waltz16  
 NUC2 1H  
 PCPD2 90.00 usec  
 PL2 -1.00 dB  
 PL12 14.52 dB  
 PL13 18.00 dB  
 SF02 400.1316005 MHz

F2 - Processing parameters  
 SI 65536  
 SF 100.6127575 MHz  
 WDW no  
 SSB 0  
 LB 0.00 Hz  
 GB 0  
 PC 1.40

161.37  
 149.95  
 147.53  
 145.94  
 141.21  
 133.39  
 132.56  
 126.15  
 123.82  
 100.24  
 97.34  
 55.73

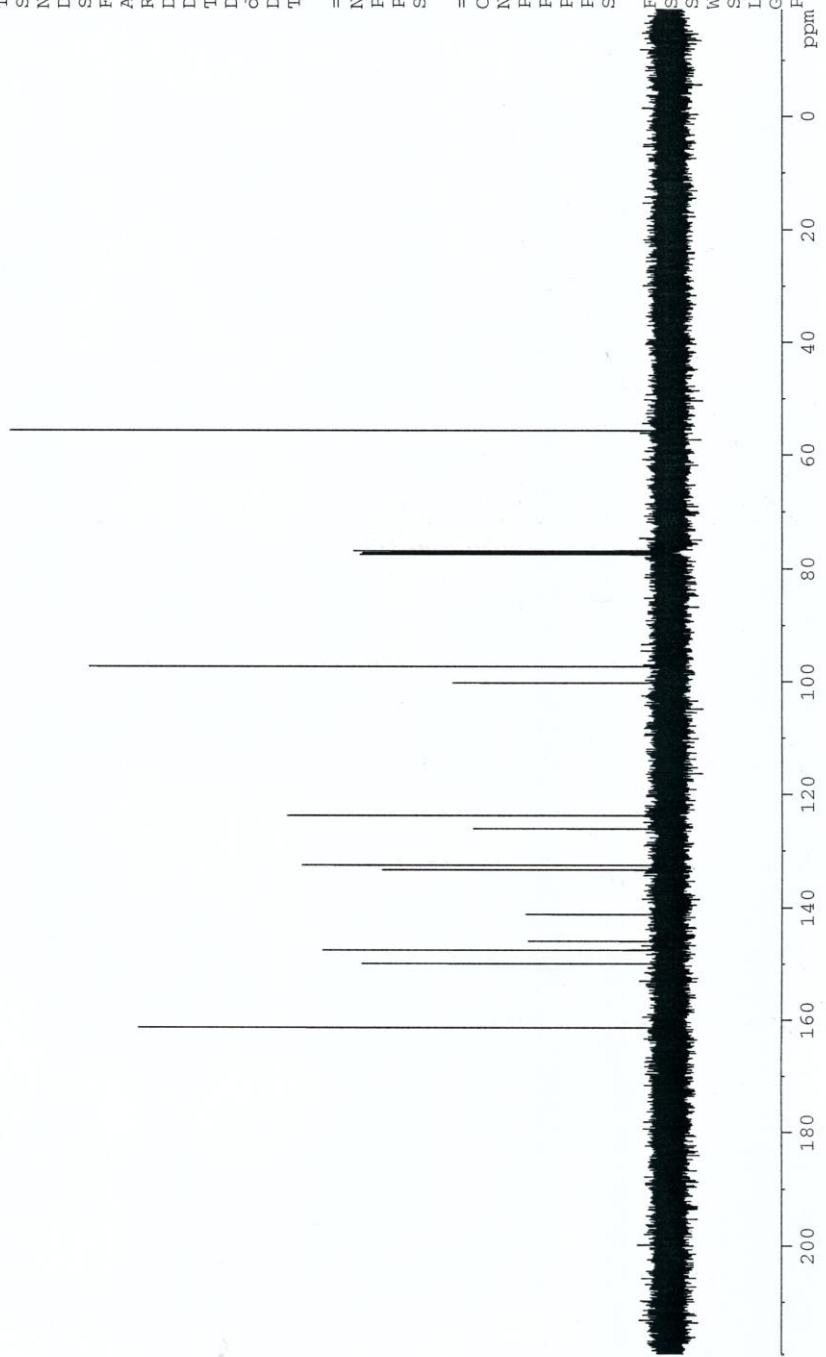



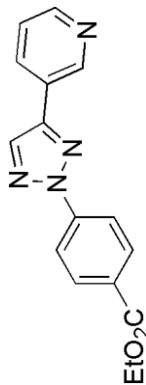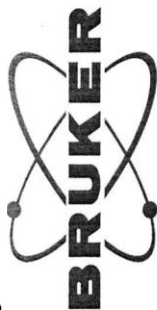

Current Data Parameters  
 NAME SU2-116  
 EXPNO 1  
 PROCNO 1

F2 - Acquisition Parameters  
 Date\_ 20110603  
 Time 9.05  
 INSTRUM spect  
 PROBHD 5 mm BBO BB-1H  
 PULPROG zg30  
 TD 65536  
 SOLVENT CDCl3  
 NS 8  
 DS 2  
 SWH 8278.146 Hz  
 FIDRES 0.126314 Hz  
 AQ 3.9584243 sec  
 RG 28.5  
 DW 60.400 usec  
 DE 6.00 usec  
 TE 297.2 K  
 D1 1.00000000 sec  
 TD0 1

==== CHANNEL f1 =====  
 NUC1 1H  
 P1 15.07 usec  
 PL1 0.00 dB  
 SFO1 400.1324710 MHz

F2 - Processing parameters  
 SI 65536  
 SF 400.1300087 MHz  
 WDW no  
 SSB 0  
 LB 0.00 Hz  
 GB 0  
 PC 1.00

1.344  
1.326  
1.308

4.329  
4.311  
4.293  
4.276

9.013  
9.010  
9.008  
8.548  
8.545  
8.541  
8.536  
8.533  
8.063  
8.049  
8.016  
8.013  
7.295  
7.283  
7.275  
7.263

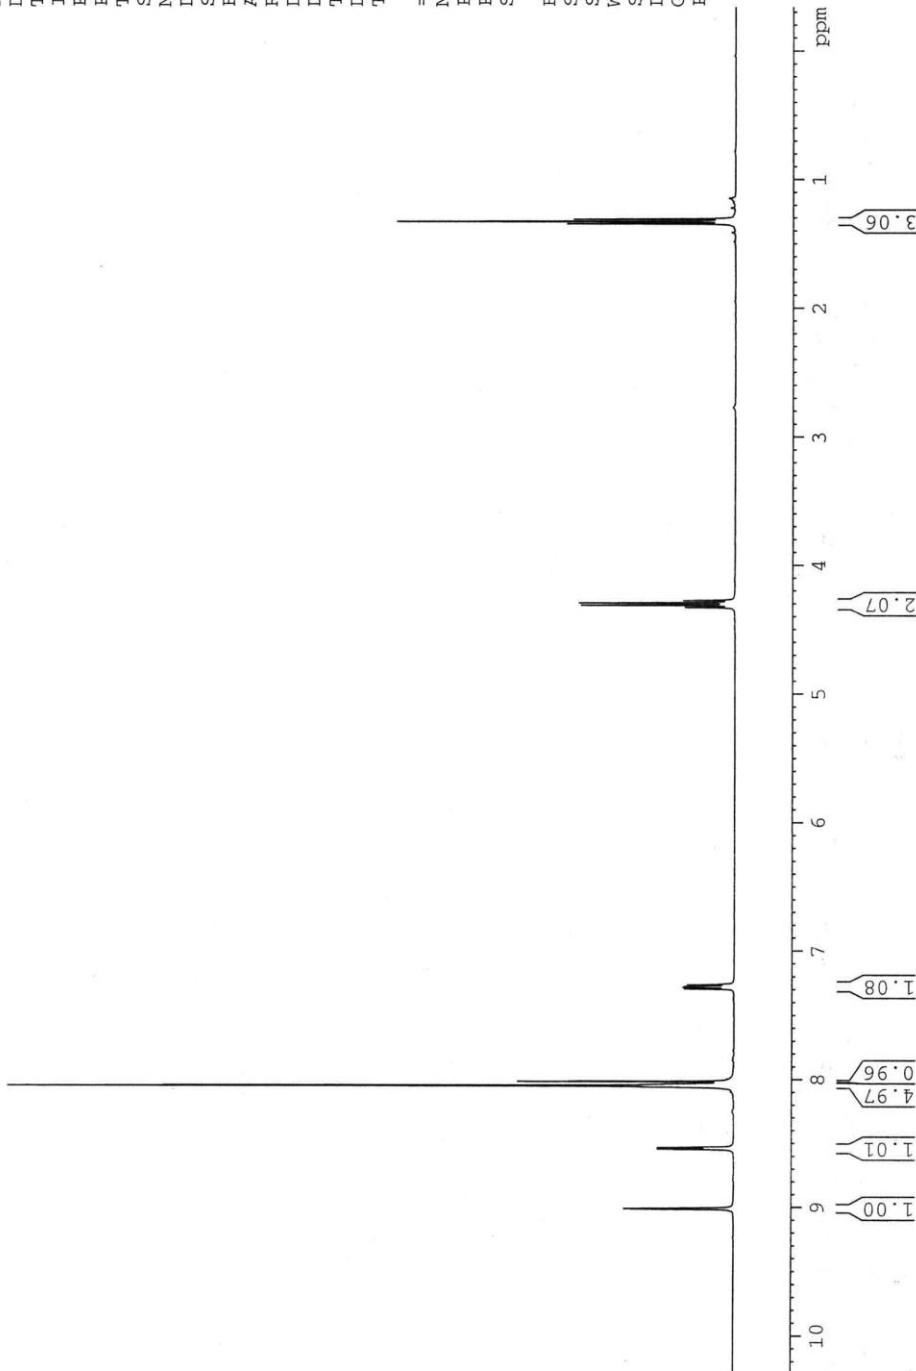

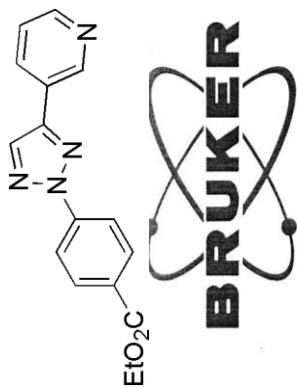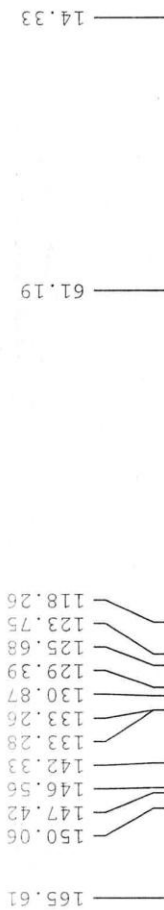

Current Data Parameters  
 NAME SU2-116C  
 EXPNO 1  
 PROCNO 1

F2 - Acquisition Parameters  
 Date\_ 20110603  
 Time 9.14  
 INSTRUM spect  
 PROBD 5 mm BBO BB-1H  
 PULPROG zgpg30  
 TD 65536  
 SOLVENT CDC13  
 NS 128  
 DS 2  
 SWH 23980.814 Hz  
 FIDRES 0.365918 Hz  
 AQ 1.3664756 sec  
 RG 13004  
 DW 20.850 usec  
 DE 6.00 usec  
 TE 297.2 K  
 D1 2.0000000 sec  
 d11 0.0300000 sec  
 DELTA 1.8999999 sec  
 TD0 1

==== CHANNEL f1 =====  
 NUC1 13C  
 P1 8.75 usec  
 PL1 -3.00 dB  
 SFO1 100.6228298 MHz  
 ===== CHANNEL f2 =====  
 CPDPRG2 waltzi6  
 NUC2 1H  
 P2 90.00 usec  
 PL2 -1.00 dB  
 PL12 14.52 dB  
 PL13 18.00 dB  
 SFO2 400.1316005 MHz

F2 - Processing parameters  
 SI 65536  
 SF 100.6127645 MHz  
 WDW no  
 SSB 0  
 LB 0.00 Hz  
 GB 0  
 PC 1.40



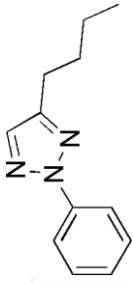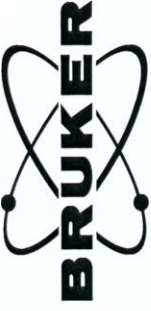

Current Data Parameters  
 NAME SUI-172-1  
 EXPNO 1  
 PROCNO 1

F2 - Acquisition Parameters  
 Date\_ 20101115  
 Time 10.57  
 INSTRUM spect  
 PROBD 5 mm QNP 1H/13  
 PULPROG zg30  
 TD 65536  
 SOLVENT CDCl3  
 NS 8  
 DS 2  
 SWH 8278.146 Hz  
 FIDRES 0.126314 Hz  
 AQ 3.9584243 sec  
 RG 57  
 DW 60.400 usec  
 DE 6.00 usec  
 TE 295.2 K  
 D1 1.00000000 sec  
 TD0 1

==== CHANNEL f1 =====  
 NUC1 1H  
 P1 14.00 usec  
 PL1 0.00 GB  
 SFO1 400.1324710 MHz  
 F2 - Processing parameters  
 SI 65536  
 SF 400.1300097 MHz  
 WDW no  
 SSB 0  
 LB 0.00 Hz  
 GB 0  
 PC 1.00

2.783  
 2.764  
 2.744  
 1.746  
 1.728  
 1.723  
 1.709  
 1.703  
 1.689  
 1.684  
 1.670  
 1.472  
 1.454  
 1.435  
 1.416  
 1.397  
 1.379  
 0.979  
 0.961  
 0.942

8.065  
 8.062  
 8.046  
 8.043  
 8.041  
 7.570  
 7.469  
 7.468  
 7.466  
 7.463  
 7.455  
 7.449  
 7.447  
 7.446  
 7.442  
 7.433  
 7.428  
 7.423  
 7.313  
 7.310  
 7.307  
 7.296  
 7.292  
 7.288  
 7.276  
 7.273

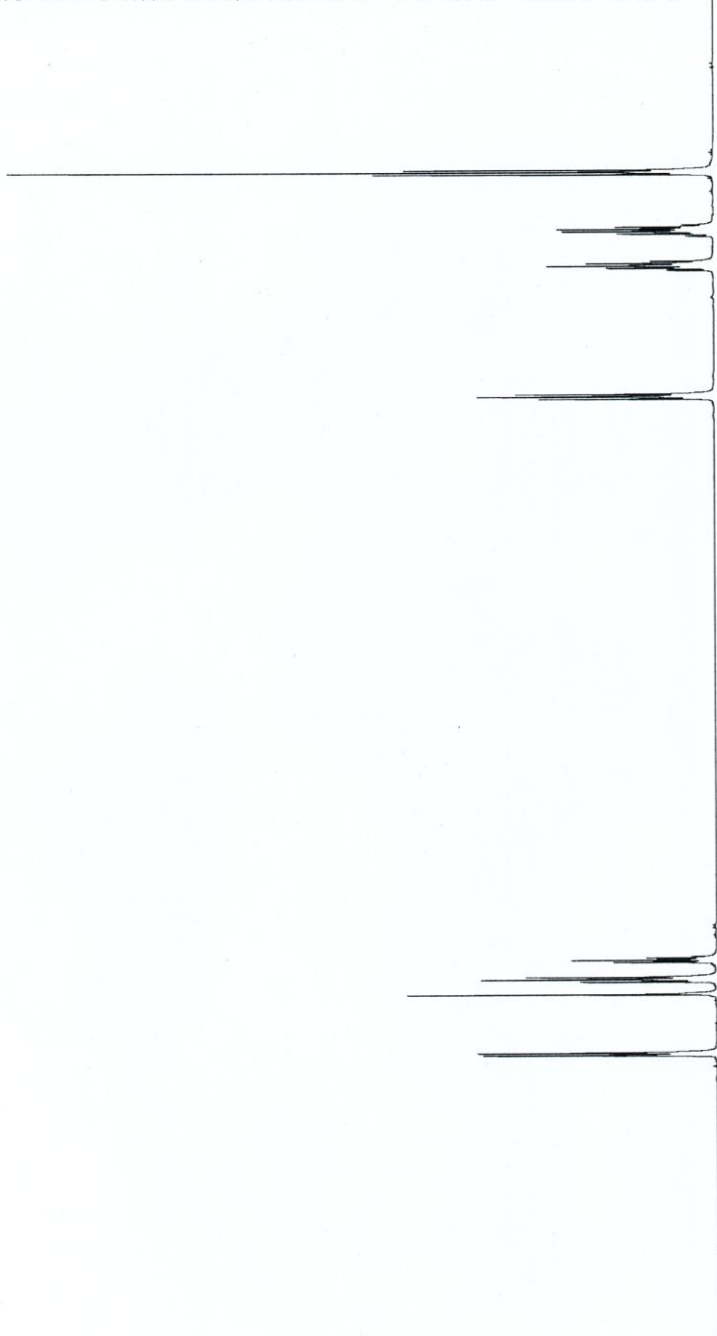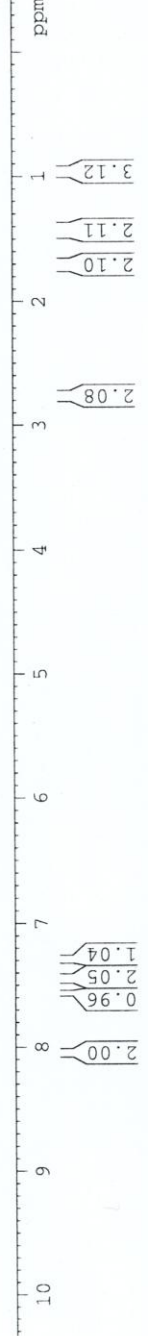

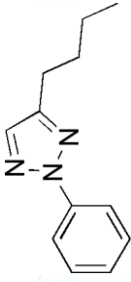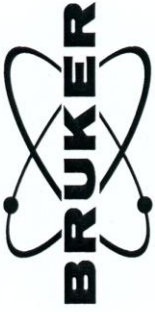

Current Data Parameters  
 NAME SUI-172-1C  
 EXPNO 1  
 PROCNO 1

F2 - Acquisition Parameters  
 Date\_ 20101115  
 Time 11.06  
 INSTRUM spect  
 PROBHD 5 mm QNP 1H/13  
 PULPROG zgpg30  
 TD 65536  
 SOLVENT CDCl3  
 NS 128  
 DS 4  
 SWH 23980.814 Hz  
 FIDRES 0.365918 Hz  
 AQ 1.3664756 sec  
 RG 5160.6  
 DW 20.850 usec  
 DE 6.00 usec  
 TE 295.2 K  
 D1 2.0000000 sec  
 d11 0.0300000 sec  
 DELTA 1.8999999 sec  
 TDO 1

==== CHANNEL f1 =====  
 NUC1 13C  
 P1 9.38 usec  
 PL1 0.00 dB  
 SFO1 100.6228298 MHz

==== CHANNEL f2 =====  
 CPDPRG2 waltz16  
 NUC2 1H  
 PCPD2 90.00 usec  
 PL2 0.00 dB  
 PL12 16.10 dB  
 PL13 19.00 dB  
 SFO2 400.1316005 MHz

F2 - Processing parameters  
 SI 32768  
 SF 100.6127580 MHz  
 WDW no  
 SSB 0  
 LB 0.00 Hz  
 GB 0  
 PC 1.40

13.95  
 22.48  
 25.43  
 31.44

118.67  
 127.07  
 129.31  
 134.39  
 140.10  
 150.34

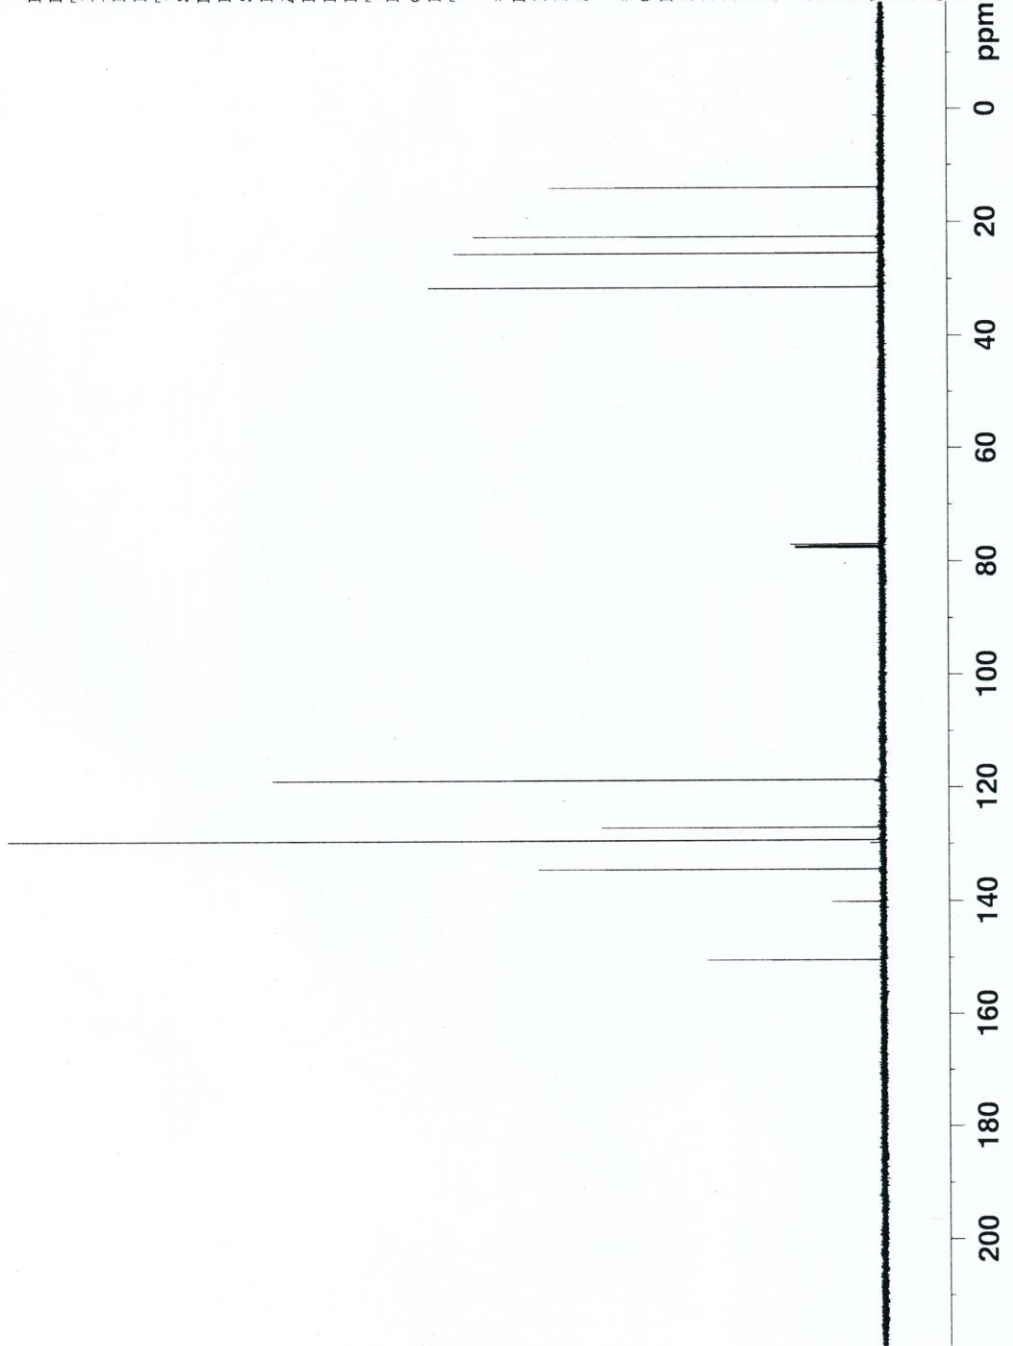

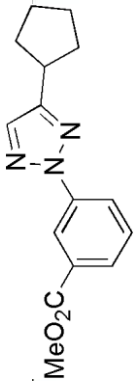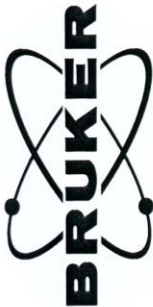

Current Data Parameters  
 NAME SU1-179-1  
 EXPNO 1  
 PROCNO 1

F2 - Acquisition Parameters  
 Date\_ 20101117  
 Time 9.00  
 INSTRUM spect  
 PROBHD 5 mm QNP 1H/13  
 PULPROG zg30  
 TD 65536  
 SOLVENT CDCl3  
 NS 8  
 DS 2  
 SWH 8278.146 Hz  
 FIDRES 0.126314 Hz  
 AQ 3.9584243 sec  
 RG 28.5  
 DW 60.400 usec  
 DE 6.00 usec  
 TE 295.2 K  
 D1 1.00000000 sec  
 TD0 1

==== CHANNEL f1 =====  
 NUC1 1H  
 P1 14.00 usec  
 PL1 0.00 dB  
 SFO1 400.1324710 MHz

F2 - Processing parameters  
 SI 65536  
 SF 400.1300091 MHz  
 WDW no  
 SSB 0  
 LB 0.00 Hz  
 GB 0  
 PC 1.00

3.888  
3.202  
3.182  
3.175  
3.163  
3.143  
3.124  
2.111  
2.083  
2.078  
2.070  
2.049  
2.030  
2.023  
1.774  
1.760  
1.724  
1.673  
1.607

8.632  
8.627  
8.623  
8.177  
8.174  
8.171  
8.168  
8.156  
8.154  
8.151  
8.148  
7.916  
7.913  
7.912  
7.909  
7.896  
7.894  
7.893  
7.890  
7.538  
7.471  
7.470  
7.451  
7.431  
7.431

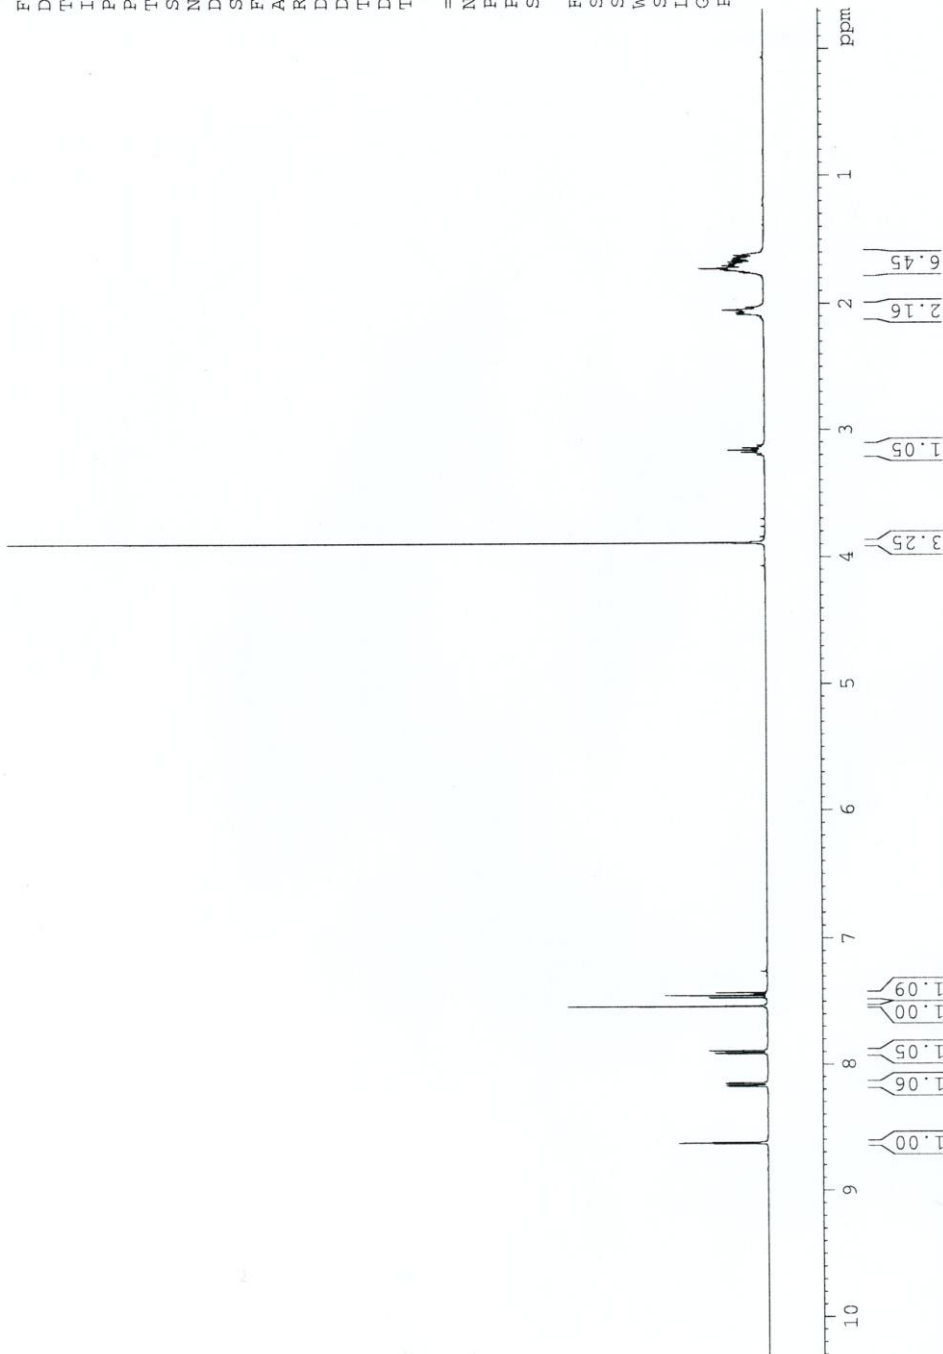

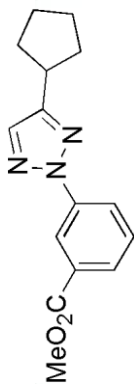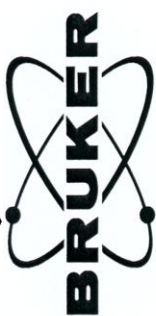

Current Data Parameters  
 NAME SUI-179-1C  
 EXPNO 1  
 PROCNO 1

F2 - Acquisition Parameters  
 Date\_ 20101117  
 Time 9.08  
 INSTRUM spect  
 PROBHD 5 mm QNP 1H/13  
 PULPROG zgpg30  
 TD 65536  
 SOLVENT CDCl3  
 NS 128  
 DS 4  
 SMW 23980.814 Hz  
 FIDRES 0.365918 Hz  
 AQ 1.3664756 sec  
 RG 4096  
 DW 20.850 usec  
 DE 6.00 usec  
 TE 295.2 K  
 D1 2.00000000 sec  
 d11 0.03000000 sec  
 DELTA 1.89999998 sec  
 TDO 1

=====  
 CHANNEL f1 13C  
 NUC1 13C  
 P1 9.38 usec  
 PL1 0.00 dB  
 SFO1 100.6228298 MHz

=====  
 CHANNEL f2  
 CPDPRG2 waltz16  
 NUC2 1H  
 PCPD2 90.00 usec  
 PL2 0.00 dB  
 PL12 16.10 dB  
 PL13 19.00 dB  
 SFO2 400.1316005 MHz

F2 - Processing parameters  
 SI 32768  
 SF 100.6127619 MHz  
 WDW no  
 SSB 0  
 LB 0.00 Hz  
 GB 0  
 PC 1.40

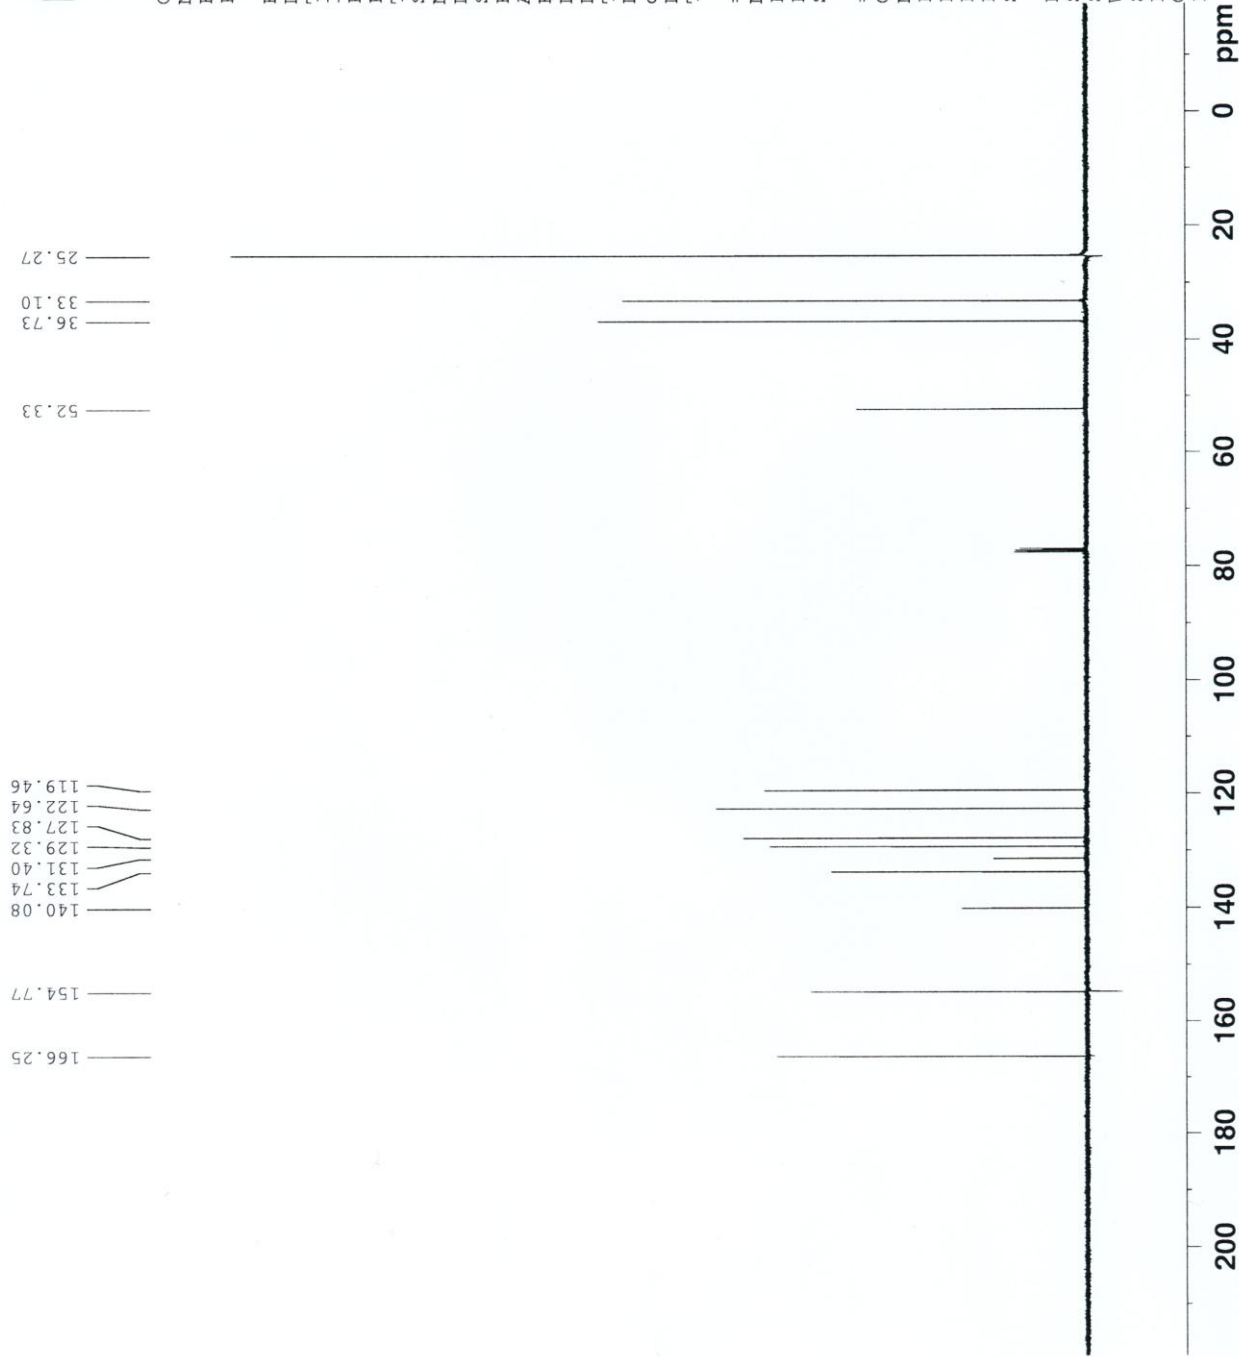

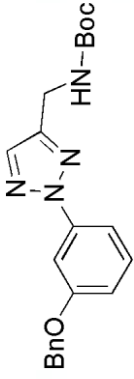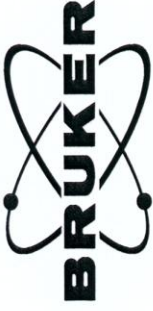

Current Data Parameters  
 NAME SU1-179-7  
 EXPNO 1  
 PROCNO 1

F2 - Acquisition Parameters  
 Date\_ 20101119  
 Time 8.50  
 INSTRUM spect  
 PROBHD 5 mm QNP 1H/13  
 PULPROG zg30  
 TD 65536  
 SOLVENT CDCl3  
 NS 8  
 DS 2  
 SWH 8278.146 Hz  
 FIDRES 0.126314 Hz  
 AQ 3.9584243 sec  
 RG 25.4  
 DW 60.400 usec  
 DE 6.00 usec  
 TE 295.2 K  
 D1 1.00000000 sec  
 TD0 1

==== CHANNEL f1 =====  
 NUC1 1H  
 P1 14.00 usec  
 PL1 0.00 dB  
 SFO1 400.1324710 MHz

F2 - Processing parameters  
 SI 65536  
 SF 400.1300093 MHz  
 WDW no  
 SSB 0  
 LB 0.00 Hz  
 GB 0  
 PC 1.00

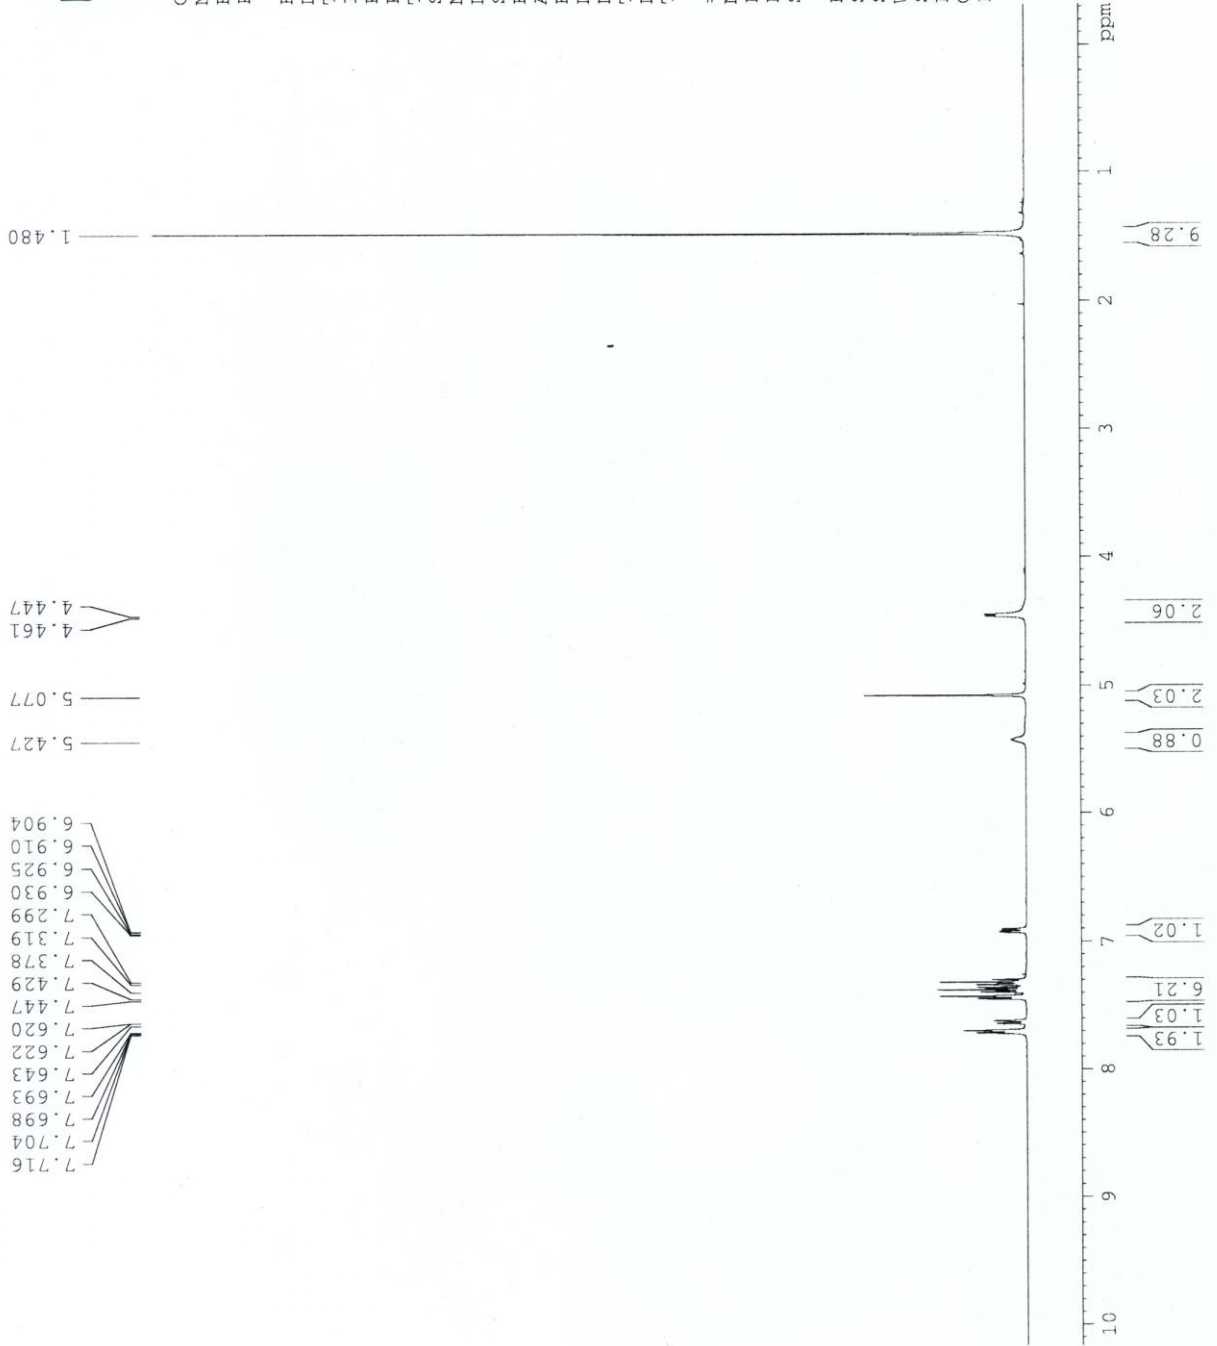



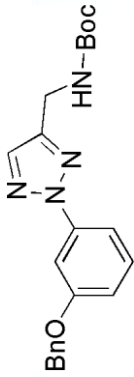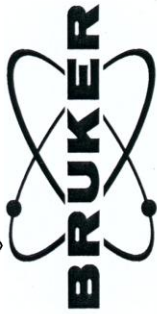

Current Data Parameters  
 NAME SUI-179-7C  
 EXPNO 1  
 PROCNO 1

F2 - Acquisition Parameters  
 Date\_ 20101119  
 Time 8.58  
 INSTRUM spect  
 PROBHD 5 mm QNP 1H/13  
 PULPROG zgpg30  
 TD 65536  
 SOLVENT CDCl3  
 NS 128  
 DS 4  
 SWH 23980.814 Hz  
 FIDRES 0.365918 Hz  
 AQ 1.3664756 sec  
 RG 1625.5  
 DW 20.850 usec  
 DE 6.00 usec  
 TE 296.2 K  
 D1 2.0000000 sec  
 d11 0.0300000 sec  
 DELTA 1.89999998 sec  
 TDO 1

==== CHANNEL f1 =====  
 NUC1 13C  
 P1 9.38 usec  
 PL1 0.00 dB  
 SFO1 100.6228298 MHz

==== CHANNEL f2 =====  
 CPDPRG2 waltz16  
 NUC2 1H  
 PCPD2 90.00 usec  
 PL2 0.00 dB  
 PL12 16.10 dB  
 PL13 19.00 dB  
 SFO2 400.1316005 MHz

F2 - Processing parameters  
 SI 32768  
 SF 100.6127720 MHz  
 WDW no  
 SSB 0  
 LB 0.00 Hz  
 GB 0  
 PC 1.40

159.46  
 155.93  
 147.44  
 140.76  
 136.54  
 134.32  
 130.14  
 128.61  
 128.09  
 127.54  
 114.21  
 111.18  
 105.21  
 79.77  
 70.15  
 36.20  
 28.41

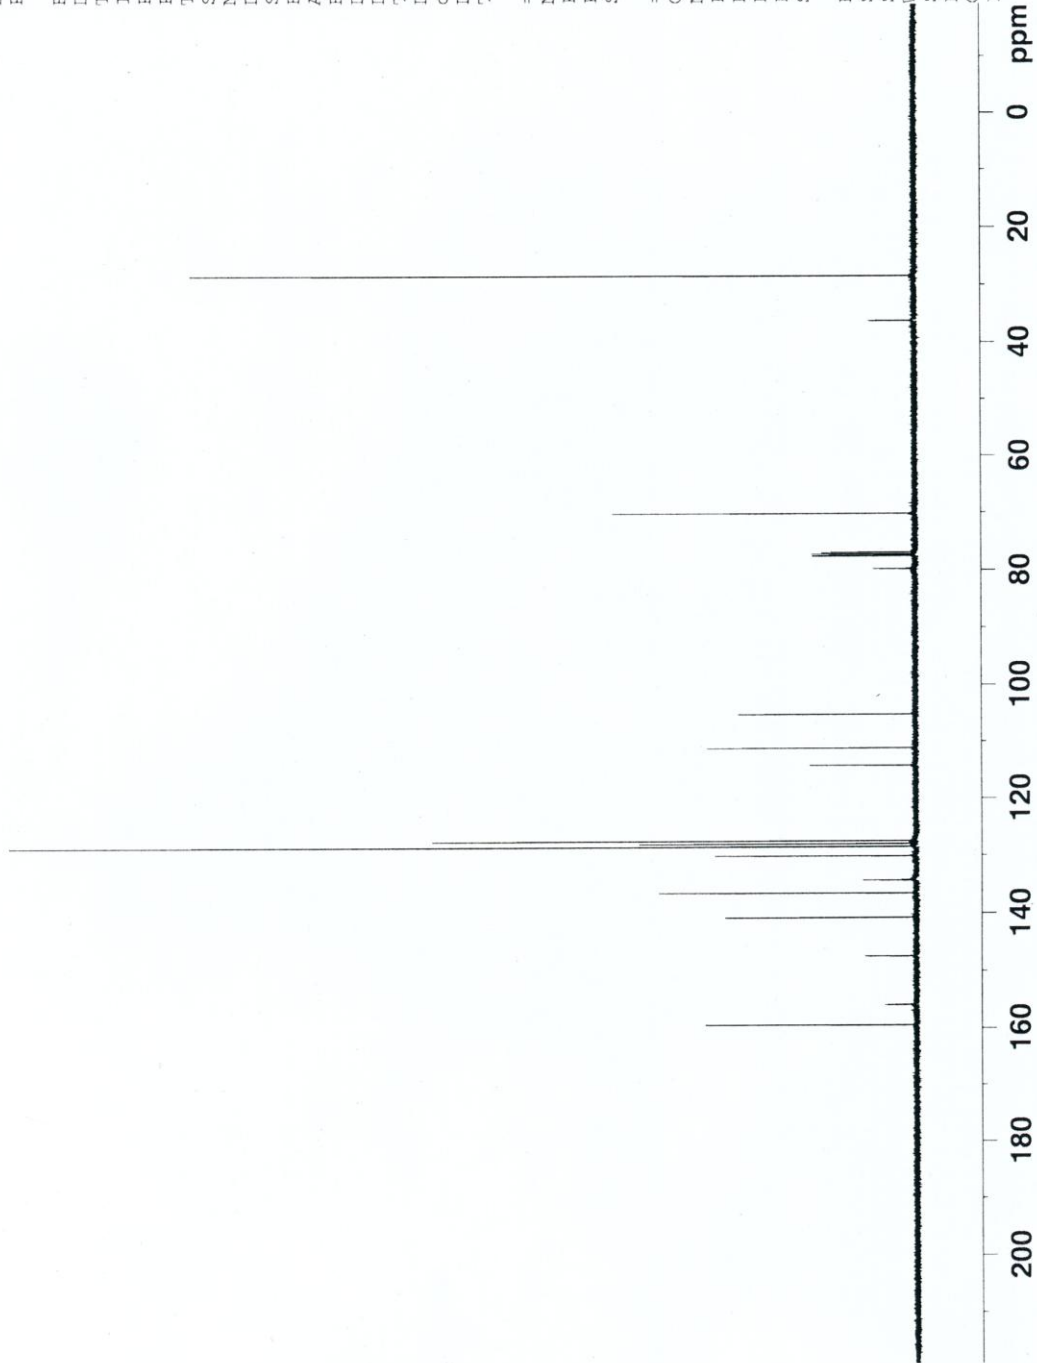

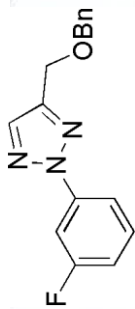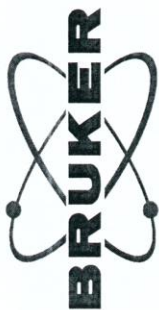

Current Data Parameters  
 NAME SUI-186-5  
 EXPNO 1  
 PROCNO 1

F2 - Acquisition Parameters  
 Date\_ 20101203  
 Time 15.02  
 INSTRUM spect  
 PROBHD 5 mm BBO BB-IH  
 PULPROG zg30  
 TD 65536  
 SOLVENT CDCl3  
 NS 8  
 DS 2  
 SWH 8278.146 Hz  
 FIDRES 0.126314 Hz  
 AQ 3.9584243 sec  
 RG 22.6  
 DW 60.400 usec  
 DE 6.00 usec  
 TE 296.2 K  
 D1 1.00000000 sec  
 TDO 1

==== CHANNEL f1 =====  
 NUC1 1H  
 P1 15.07 usec  
 PL1 0.00 dB  
 SFO1 400.1324710 MHz

F2 - Processing parameters  
 SI 65536  
 SF 400.1300075 MHz  
 WDW no  
 SSB 0  
 LB 0.00 Hz  
 GB 0  
 PC 1.00

7.922  
7.920  
7.902  
7.901  
7.898  
7.881  
7.875  
7.870  
7.851  
7.853  
7.438  
7.421  
7.402  
7.383  
7.359  
7.343  
7.327  
7.322  
7.075  
7.073  
7.069  
7.067  
7.054  
7.052  
7.048  
7.046  
7.034  
7.032  
7.027  
7.026  
4.749  
4.661

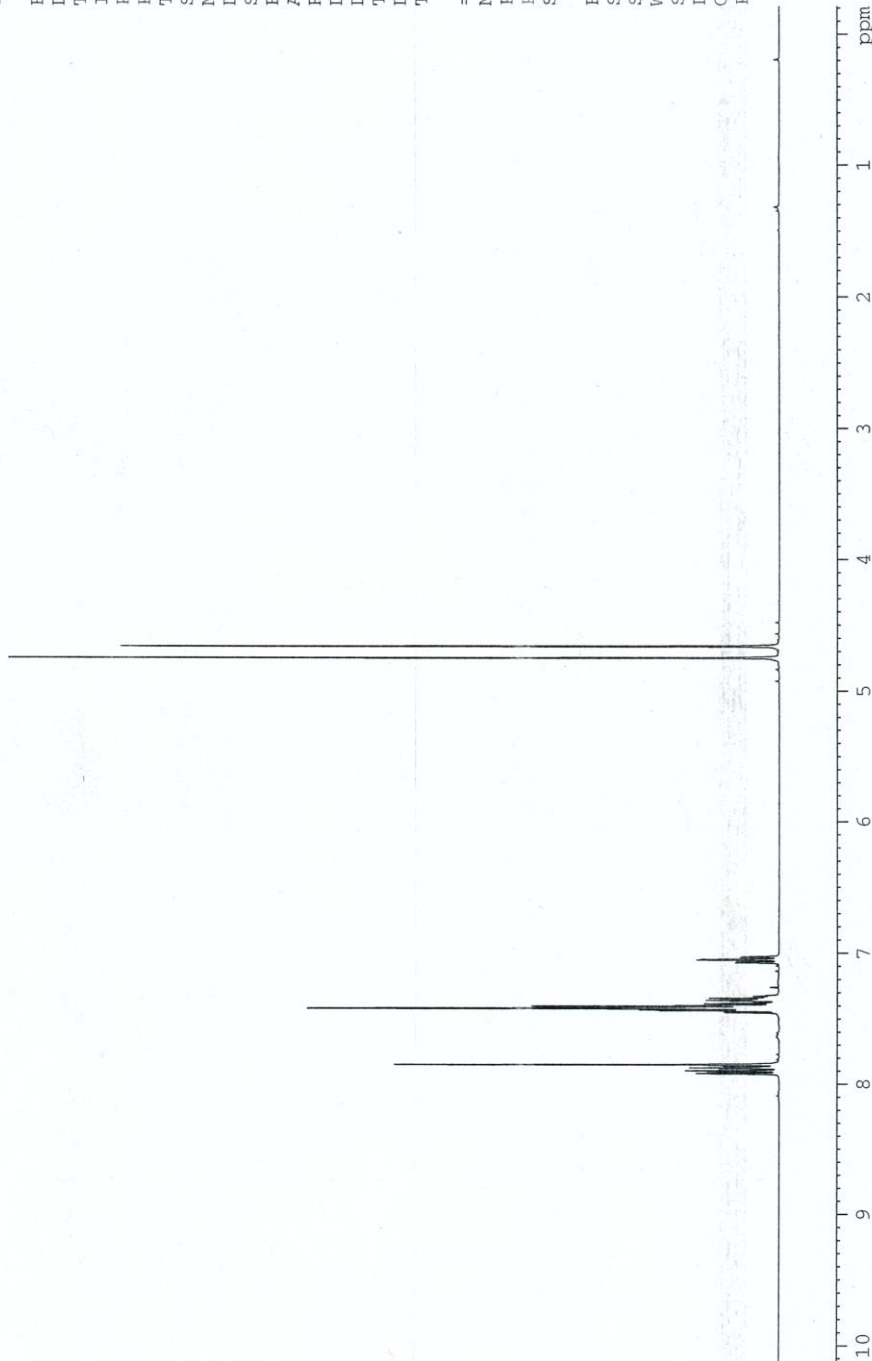

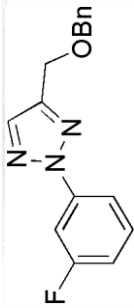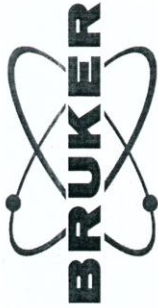

Current Data Parameters  
 NAME SUI-186-5  
 EXPNO 4  
 PROCNO 4

F2 - Acquisition Parameters  
 Date\_ 20101203  
 Time 15.18  
 INSTRUM spect  
 PROBHD 5 mm BBO BB-1H  
 PULPROG zgpg30  
 TD 65536  
 SOLVENT CDCl3  
 NS 128  
 DS 2  
 SWH 23980.814 Hz  
 FIDRES 0.365918 Hz  
 AQ 1.3664756 sec  
 RG 8192  
 DW 20.850 usec  
 DE 6.00 usec  
 TE 297.2 K  
 D1 2.0000000 sec  
 d11 0.0300000 sec  
 DELTA 1.89999998 sec  
 TD0 1

==== CHANNEL f1 =====  
 NUC1 13C  
 P1 8.75 usec  
 PL1 -3.00 dB  
 SFO1 100.6228298 MHz

==== CHANNEL f2 =====  
 CPDPRG2 waltz16  
 NUC2 1H  
 PCPD2 90.00 usec  
 PL2 -1.00 dB  
 PL12 14.52 dB  
 PL13 18.00 dB  
 SFO2 400.1316005 MHz

F2 - Processing parameters  
 SI 65536  
 SF 100.6127671 MHz  
 WDW no  
 SSB 0  
 LB 0.00 Hz  
 GB 0  
 PC 1.40

164.35  
 161.90  
 147.32  
 141.08  
 140.98  
 137.68  
 135.46  
 130.75  
 130.66  
 128.59  
 128.01  
 127.99  
 114.38  
 114.36  
 114.32  
 114.16  
 106.75  
 106.49

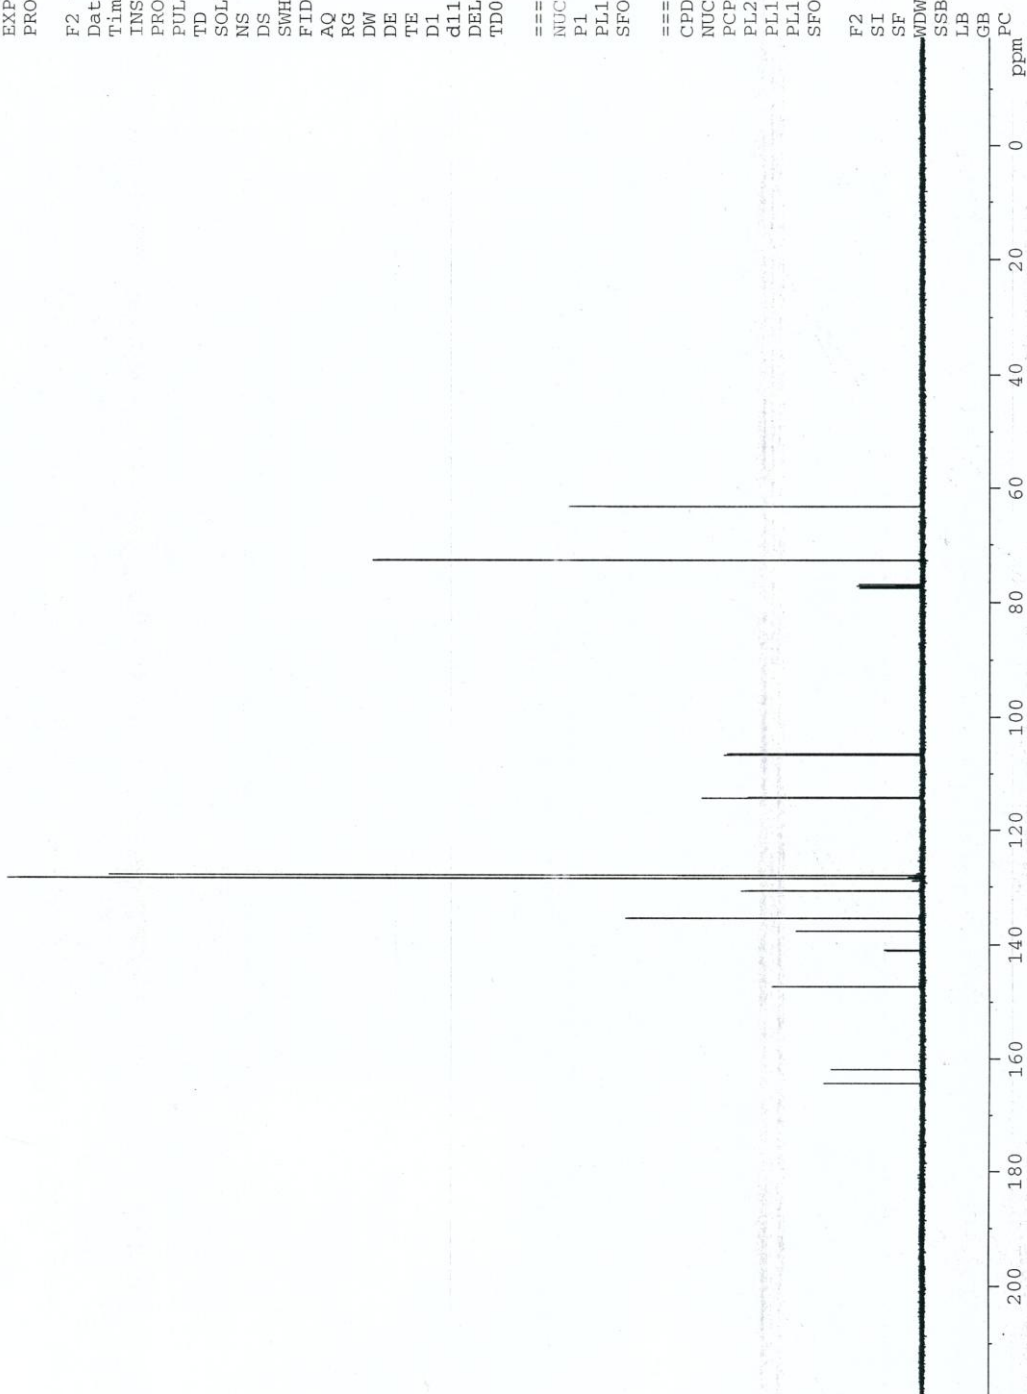



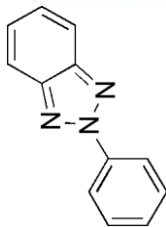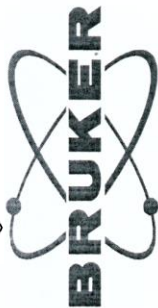

Current Data Parameters  
 NAME SUI-227 Fr3-10  
 EXPNO 1  
 PROCNO 1

F2 - Acquisition Parameters  
 Date\_ 20110302  
 Time 9.33  
 INSTRUM spect  
 PROBHD 5 mm QNP 1H/13  
 PULPROG zg30  
 TD 65536  
 SOLVENT CDC13  
 NS 16  
 DS 2  
 SWH 8278.146 Hz  
 FIDRES 0.126314 Hz  
 AQ 3.9584243 sec  
 RG 181  
 DW 60.400 usec  
 DE 6.00 usec  
 TE 296.2 K  
 D1 1.00000000 sec  
 TDO 1

==== CHANNEL f1 =====  
 NUC1 1H  
 P1 14.00 usec  
 PL1 0.00 dB  
 SFO1 400.1324710 MHz

F2 - Processing parameters  
 SI 65536  
 SF 400.1300095 MHz  
 WDW no  
 SSB 0  
 LB 0.00 Hz  
 GB 0  
 PC 1.00

7.400  
7.408  
7.417  
7.424  
7.427  
7.446  
7.464  
7.529  
7.546  
7.550  
7.568  
7.928  
7.936  
7.944  
7.952  
8.356  
8.359  
8.361  
8.377  
8.381

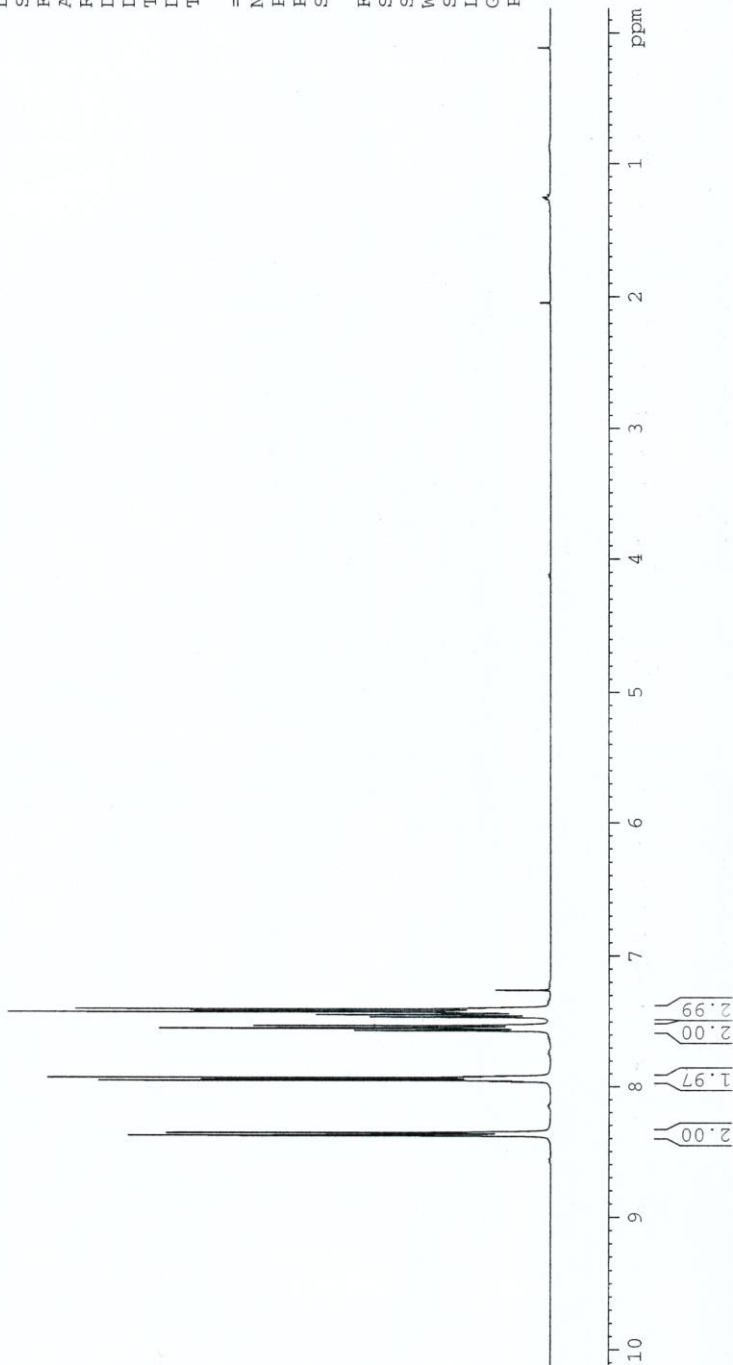

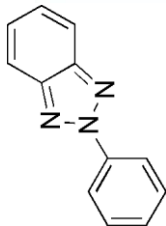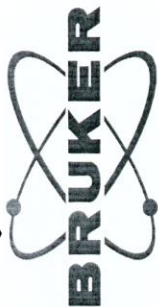

Current Data Parameters  
 NAME SUI-227 Fr3-10C  
 EXPNO 1  
 PROCNO 1

F2 - Acquisition Parameters  
 Date\_ 20110302  
 Time 9.41  
 INSTRUM spect  
 PROBHD 5 mm QNP 1H/13  
 PULPROG zgpg30  
 TD 65536  
 SOLVENT CDCl3  
 NS 128  
 DS 4  
 SWH 23980.814 Hz  
 FIDRES 0.365918 Hz  
 AQ 1.3664756 sec  
 RG 4096  
 DW 20.850 usec  
 DE 6.00 usec  
 TE 296.2 K  
 D1 2.0000000 sec  
 d11 0.0300000 sec  
 DELTA 1.89999998 sec  
 TDO 1

==== CHANNEL f1 =====  
 NUC1 13C  
 P1 9.38 usec  
 PL1 0.00 dB  
 SFO1 100.6228298 MHz

==== CHANNEL f2 =====  
 CPDPRG2 waltz16  
 NUC2 1H  
 PCPD2 90.00 usec  
 PL2 0.00 dB  
 PL12 16.10 dB  
 PL13 19.00 dB  
 SFO2 400.1316005 MHz

F2 - Processing parameters  
 SI 32768  
 SF 100.6127535 MHz  
 WDW no  
 SSB 0  
 LB 0.00 Hz  
 GB 0  
 PC 1.40

145.20  
 140.53  
 129.59  
 129.13  
 127.33  
 120.79  
 118.56

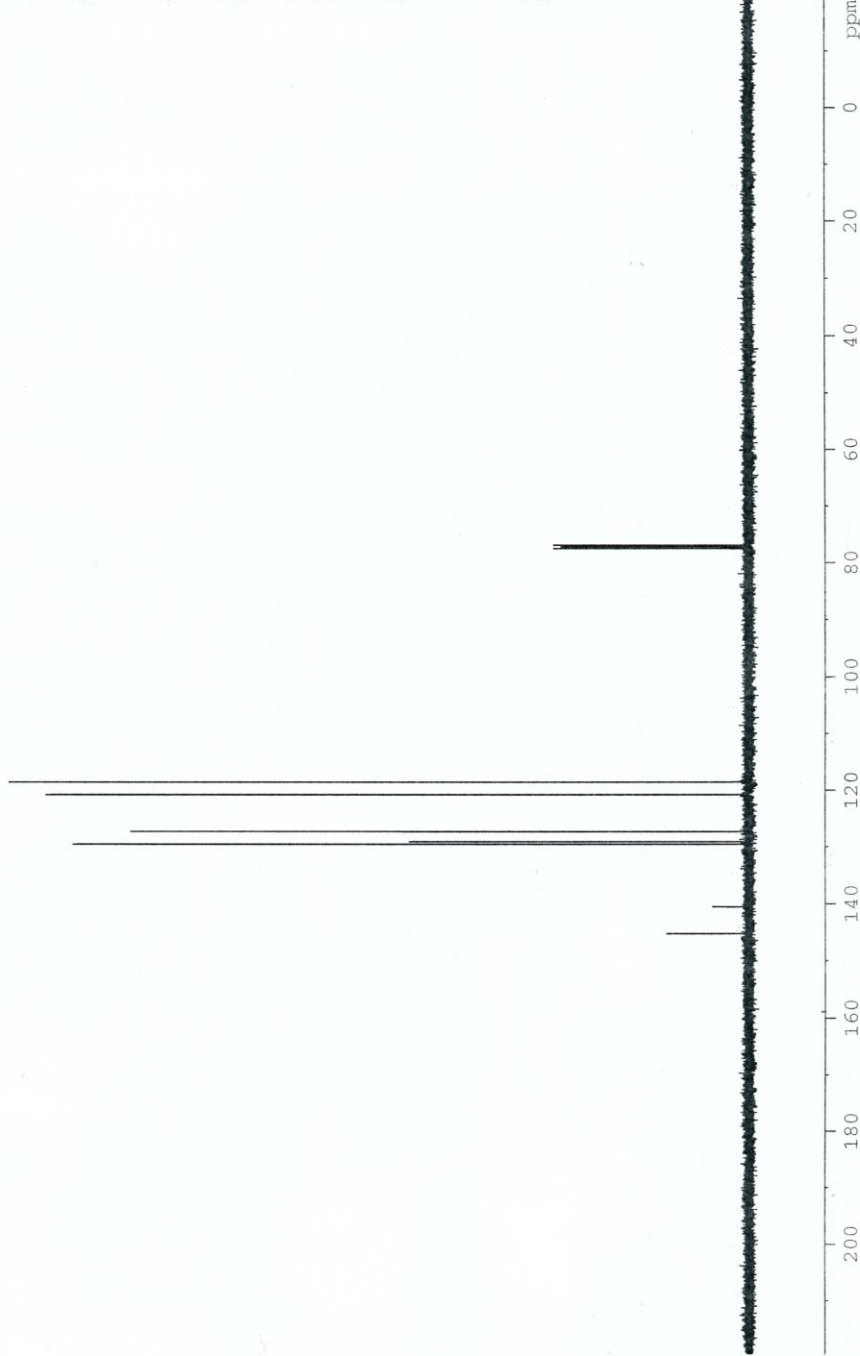

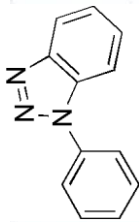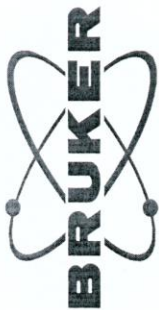

Current Data Parameters  
 NAME S01-227 Fr13-20  
 EXPNO 1  
 PROCNO 1

F2 - Acquisition Parameters

Date\_ 20110302  
 Time 9.45  
 INSTRUM spect  
 PROBHD 5 mm QNP 1H/13  
 PULPROG zg30  
 TD 65536  
 SOLVENT CDC13  
 NS 16  
 DS 2  
 SWH 8278.146 Hz  
 FIDRES 0.126314 Hz  
 AQ 3.9584243 sec  
 RG 143.7  
 DW 60.400 usec  
 DE 6.00 usec  
 TE 296.2 K  
 D1 1.00000000 sec  
 TDO 1

==== CHANNEL f1 =====  
 NUC1 1H  
 P1 14.00 usec  
 PL1 0.00 dB  
 SFO1 400.1324710 MHz

F2 - Processing parameters

SI 65536  
 SF 400.1300094 MHz  
 WDW no  
 SSB 0  
 LB 0.00 Hz  
 GB 0  
 PC 1.00

7.769  
7.766  
7.750  
7.748  
7.746  
7.729  
7.708  
7.602  
7.601  
7.596  
7.582  
7.579  
7.566  
7.562  
7.535  
7.532  
7.517  
7.515  
7.511  
7.496  
7.494  
7.491  
7.488  
7.476  
7.472  
7.453  
7.424  
7.404  
7.386  
7.384

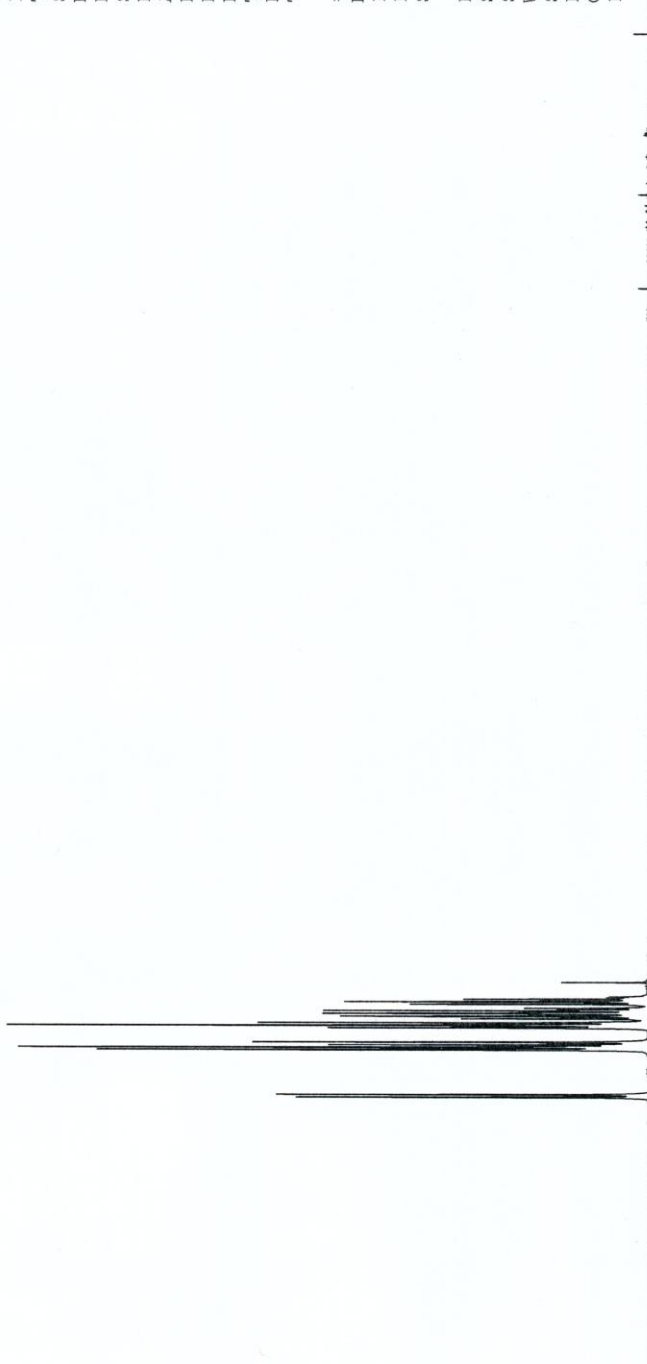

1.06  
2.02  
2.08  
3.03  
1.00

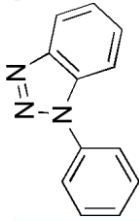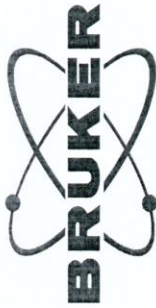

Current Data Parameters  
 NAME SUI-227 Fr13-20C  
 EXPNO 1  
 PROCNO 1

F2 - Acquisition Parameters  
 Date\_ 20110302  
 Time 9.53  
 INSTRUM spect  
 PROBHD 5 mm QNP 1H/13  
 PULPROG zgpg30  
 TD 65536  
 SOLVENT CDC13  
 NS 128  
 DS 4  
 SWH 23980.814 Hz  
 FIDRES 0.365918 Hz  
 AQ 1.3664756 sec  
 RG 1625.5  
 DW 20.850 usec  
 DE 6.00 usec  
 TE 296.2 K  
 D1 2.00000000 sec  
 d11 0.03000000 sec  
 DELTA 1.89999998 sec  
 TD0 1

==== CHANNEL f1 =====  
 NUC1 13C  
 P1 9.38 usec  
 PL1 0.00 dB  
 SFO1 100.6228298 MHz

==== CHANNEL f2 =====  
 CPDPRG2 waltz16  
 NUC2 1H  
 PCPD2 90.00 usec  
 PL2 0.00 dB  
 PL12 16.10 dB  
 PL13 19.00 dB  
 SFO2 400.1316005 MHz

F2 - Processing parameters  
 SI 32768  
 SF 100.6127589 MHz  
 WDW no  
 SSB 0  
 LB 0.00 Hz  
 GB 0  
 PC 1.40

146.63  
 137.10  
 132.40  
 129.97  
 128.76  
 128.35  
 124.49  
 122.94  
 120.38  
 110.48

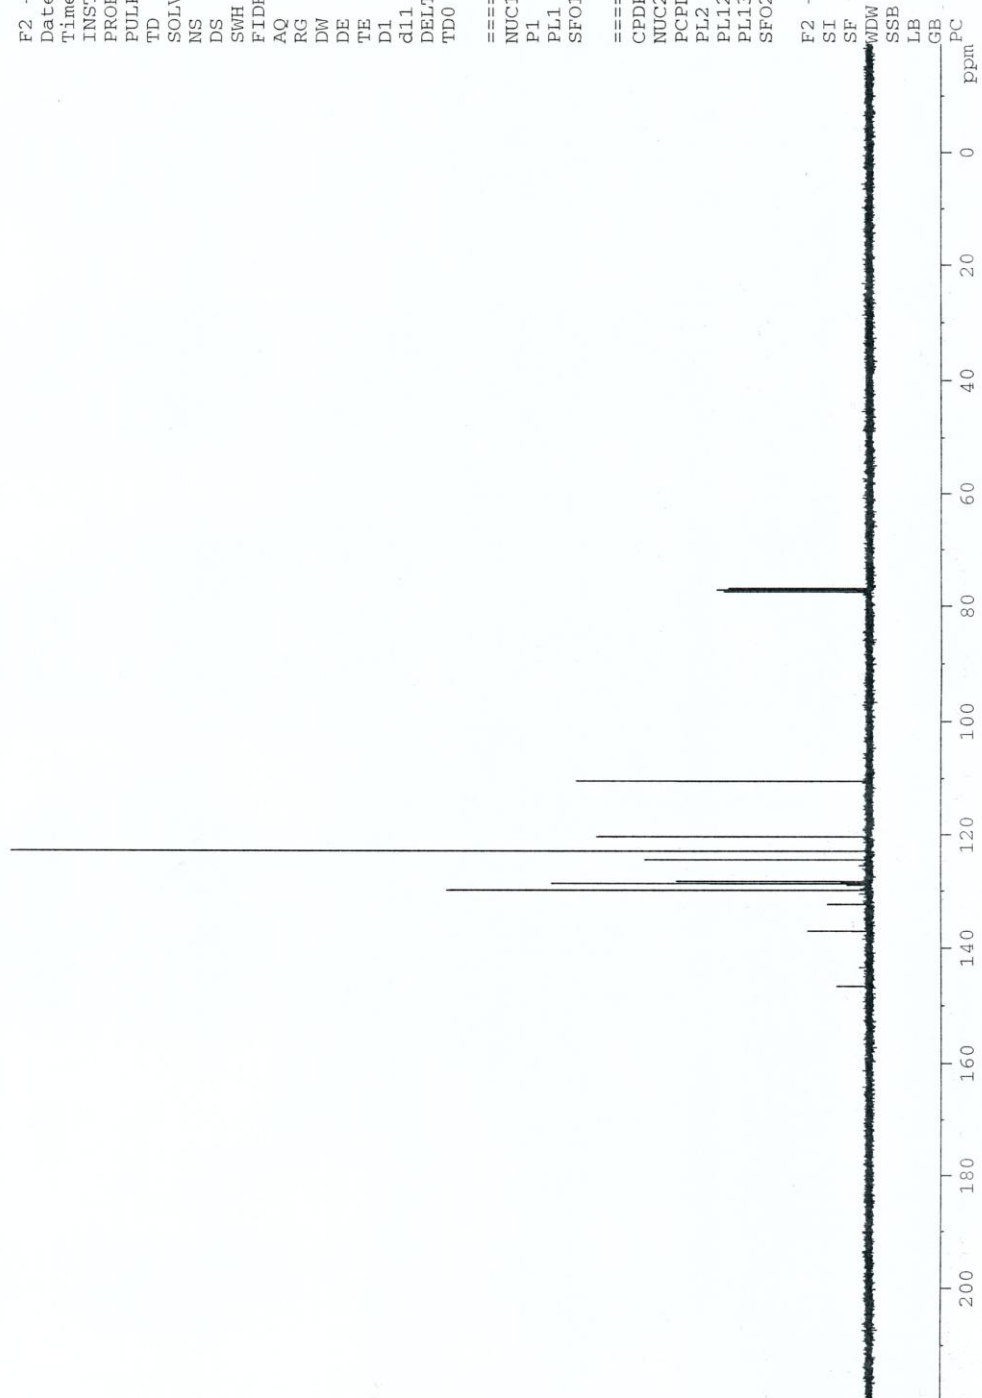

Supplement: NIHMS349291-supplement-Supporting_Information.pdf [file NIHMS349291-supplement-Supporting_Information.pdf]
